# Supplementary material for: Method development and characterisation of the low-molecular-weight peptidome of human wound fluids
Source: eLife. 2021 Jul 6;10:e66876. doi: 10.7554/eLife.66876 (PMC8260221; doi:10.7554/eLife.66876)
Supplement: Source data 2. — List of 7809 unique peptide sequences identified by LC–MS/MS. [file elife-66876-data2.xlsx]

## Sheet: peptide
Peptide	-10lgP	Mass	Length	ppm	m/z	RT	Area Sample 1	Fraction	Scan	Source File	#Feature	#Feature Sample 1	Accession	PTM	AScore
TYFPHFDLSHGSAQV	98.33	1704.79	15	1.8	853.404	74.4	2560000000	9	F9:36176	WF5_80uL_long_1.raw	15	15	sp|P69905|HBA_HUMAN
TLEIPGNSDPNM(+15.99)IPDGDFN	94.23	2060.9	19	2.7	1031.46	97	658000000	5	F5:40834	WF3_80uL_long_1.raw	26	26		Oxidation (M)	M12:Oxidation (M):1000.00
HASLDKFLASVSTVLTSKY	94.19	2066.1	19	1.7	1034.06	106.3	552000000	11	F11:70659	170303_WF1_2.raw	34	34	sp|P69905|HBA_HUMAN
AALLSPYSYSTTAVVTNPKE	91.5	2111.08	20	0.9	1056.55	75.71	159000000	14	F14:35483	170303_WF2_2.raw	38	38	sp|P02766|TTHY_HUMAN
YFPHFDLSHGSAQV	91.41	1603.74	14	1.7	802.88	68.82	1570000000	16	F16:26156	170303_WF3_2.raw	18	18	sp|P69905|HBA_HUMAN
KLDDDLEHQGGHVLDHGH	90.68	2020.94	18	1.1	1011.48	15.86	83400000	11	F11:6634	170303_WF1_2.raw	21	21	sp|P01042|KNG1_HUMAN
DLGTLSGIGTLDGFR	90.44	1520.78	15	1.4	761.4	105.92	33300000	15	F15:41975	170303_WF3_1.raw	34	34	sp|P02671|FIBA_HUMAN
DIQM(+15.99)TQSPSSLSASVGDRV	89.54	1992.94	19	3.2	997.482	53.98	29000000	11	F11:32777	170303_WF1_2.raw	31	31		Oxidation (M)	M4:Oxidation (M):1000.00
VLTIDEKGTEAAGAM(+15.99)FL	89.38	1780.89	17	2.8	891.456	87.08	10700000	19	F19:42110	170303_WF5_1.raw	16	16	sp|P01009|A1AT_HUMAN	Oxidation (M)	M15:Oxidation (M):1000.00
FDTASTGKTFPGFFSPM(+15.99)	89.1	1852.83	17	3.5	927.428	97.05	268000000	9	F9:46664	WF5_80uL_long_1.raw	21	21	sp|P02671|FIBA_HUMAN	Oxidation (M)	M17:Oxidation (M):1000.00
VFSN(+.98)GADLSGVTEEAPLKL	87.43	1946.98	19	1.6	974.501	104.2	2090000	9	F9:50822	WF5_80uL_long_1.raw	12	12	sp|P01009|A1AT_HUMAN	Deamidation (NQ)	N4:Deamidation (NQ):1000.00
AVLTIDEKGTEAAGAM(+15.99)	87.08	1591.78	16	0.7	796.896	30.62	6440000	9	F9:14736	WF5_80uL_long_1.raw	10	10	sp|P01009|A1AT_HUMAN	Oxidation (M)	M16:Oxidation (M):1000.00
FFDSFGNLSSASAIM(+15.99)GNPK	86.56	2004.92	19	4.4	1003.47	90.91	3170000	9	F9:43669	WF5_80uL_long_1.raw	19	19	sp|P69891|HBG1_HUMAN:sp|P69892|HBG2_HUMAN	Oxidation (M)	M15:Oxidation (M):1000.00
VLGAFSDGLAHLDNL	86.52	1540.79	15	2.6	771.404	105.25	217000000	20	F20:53441	170303_WF5_2.raw	27	27	sp|P68871|HBB_HUMAN:sp|P02042|HBD_HUMAN
SLDKFLASVSTVLTSKY	86.49	1858.01	17	2.4	930.014	110.11	567000000	19	F19:57046	170303_WF5_1.raw	40	40	sp|P69905|HBA_HUMAN
TATSEYQTFFNPR	85.93	1560.72	13	1.9	781.369	63.08	25300000	16	F16:23913	170303_WF3_2.raw	24	24	sp|P00734|THRB_HUMAN
AVLTIDEKGTEAAGAM(+15.99)FL	85.74	1851.93	18	1.6	926.973	93.01	16900000	16	F16:34939	170303_WF3_2.raw	26	26	sp|P01009|A1AT_HUMAN	Oxidation (M)	M16:Oxidation (M):1000.00
VGAHAGEYGAEALERM(+15.99)FL	85.4	1935.91	18	0.8	968.966	85.15	28900000	16	F16:32140	170303_WF3_2.raw	17	17	sp|P69905|HBA_HUMAN	Oxidation (M)	M16:Oxidation (M):1000.00
GAHAGEYGAEALER	85.22	1429.66	14	-0.2	715.836	14.44	196000000	16	F16:4795	170303_WF3_2.raw	29	29	sp|P69905|HBA_HUMAN
IILEDENDAM(+15.99)ADADRL	84.51	1818.83	16	-2.2	910.421	64.81	436000	16	F16:24433	170303_WF3_2.raw	9	9	sp|Q9BUN1|MENT_HUMAN	Oxidation (M)	M10:Oxidation (M):1000.00
GGSTSYGTGSETESPRNPS	84.5	1869.8	19	2.1	935.908	12.45	11700000	6	F6:3080	WF3_80uL_long_2.raw	14	14	sp|P02671|FIBA_HUMAN
DTASTGKTFPGFF	84.33	1374.65	13	2.6	688.332	92.46	45700000	5	F5:38885	WF3_80uL_long_1.raw	16	16	sp|P02671|FIBA_HUMAN
DTASTGKTFPGFFSPM(+15.99)	84.29	1705.77	16	2.1	853.892	88.8	565000000	16	F16:33693	170303_WF3_2.raw	20	20	sp|P02671|FIBA_HUMAN	Oxidation (M)	M16:Oxidation (M):1000.00
AM(+15.99)GIM(+15.99)NSFVNDIFERI	83.91	1887.89	16	-0.2	944.95	110.58	133000000	19	F19:57313	170303_WF5_1.raw	39	39		Oxidation (M)	M2:Oxidation (M):1000.00;M5:Oxidation (M):1000.00
QLGLPGPPDVPDHA	83.12	1411.71	14	2.7	706.864	66.03	799000000	5	F5:27980	WF3_80uL_long_1.raw	31	31	sp|Q14624|ITIH4_HUMAN
VLTIDEKGTEAAGAM(+15.99)	83.11	1520.74	15	1.9	761.378	24.2	3960000	20	F20:10629	170303_WF5_2.raw	10	10	sp|P01009|A1AT_HUMAN	Oxidation (M)	M15:Oxidation (M):1000.00
DSGEGDFLAEGGGVR	83.01	1464.65	15	1.3	733.332	49.64	111000000	10	F10:23902	WF5_80uL_long_2.raw	38	38	sp|P02671|FIBA_HUMAN
IILEDENDAM(+15.99)ADADR	82.94	1705.75	15	2.3	853.882	30.7	621000	16	F16:12092	170303_WF3_2.raw	6	6	sp|Q9BUN1|MENT_HUMAN	Oxidation (M)	M10:Oxidation (M):1000.00
ALLSPYSYSTTAVVTNPKE	82.9	2040.04	19	-0.6	1021.03	74.05	1150000	4	F4:38901	WF2_80uL_long_2.raw	12	12	sp|P02766|TTHY_HUMAN
LLSPYSYSTTAVVTNPKE	82.8	1969	18	0.9	985.51	65.19	1250000	16	F16:24563	170303_WF3_2.raw	15	15	sp|P02766|TTHY_HUMAN
SVLPEGGETPLFKQFF	82.79	1794.92	16	1.6	898.468	109.24	114000000	9	F9:54942	WF5_80uL_long_1.raw	28	28	sp|P06396|GELS_HUMAN
TGKTFPGFFSPM(+15.99)L	82.74	1444.71	13	3	723.362	98.93	61700000	5	F5:41772	WF3_80uL_long_1.raw	18	18	sp|P02671|FIBA_HUMAN	Oxidation (M)	M12:Oxidation (M):1000.00
YTGIFTDQVLSVLKGEE	82.68	1897.97	17	-1.9	949.989	111.07	46900000	15	F15:44859	170303_WF3_1.raw	30	30	sp|P02655|APOC2_HUMAN
LLSLKPSEAPELDEDEGF	82.48	1987.96	18	1	994.99	96.32	39600000	20	F20:47305	170303_WF5_2.raw	19	19	sp|P33241|LSP1_HUMAN
SPLFM(+15.99)GKVVNPTQ	82.36	1432.74	13	0.7	717.377	37.89	155000000	15	F15:14827	170303_WF3_1.raw	19	19	sp|P01009|A1AT_HUMAN	Oxidation (M)	M5:Oxidation (M):1000.00
DLGTLSGIGTLDGF	82.3	1364.68	14	1.7	683.35	116.89	9320000	5	F5:52250	WF3_80uL_long_1.raw	14	14	sp|P02671|FIBA_HUMAN
VDIDTPDINIEGSEGKF	82.29	1847.88	17	4.5	924.951	90.82	4640000	4	F4:49098	WF2_80uL_long_2.raw	14	14	sp|Q09666|AHNK_HUMAN
FFDTASTGKTFPG	82.11	1374.65	13	2.7	688.332	54.8	88400000	5	F5:22914	WF3_80uL_long_1.raw	15	15	sp|P02671|FIBA_HUMAN
GAHAGEYGAEALERM(+15.99)	82.01	1576.69	15	2.6	789.356	16.1	170000000	9	F9:6256	WF5_80uL_long_1.raw	22	22	sp|P69905|HBA_HUMAN	Oxidation (M)	M15:Oxidation (M):1000.00
VIAM(+15.99)EEPAVPAPLPK	81.82	1576.85	15	2.2	789.436	47.68	7010000	5	F5:19828	WF3_80uL_long_1.raw	9	9	sp|P14317|HCLS1_HUMAN	Oxidation (M)	M4:Oxidation (M):1000.00
SELTQDPAVSVALGQTV	81.69	1713.88	17	2.1	857.948	102.57	10300000	1	F1:48412	WF1_80uL_long_1.raw	13	13	sp|P01714|LV319_HUMAN
RLLLPGELAKHAVSEGTKAVTKYTSS	81.67	2755.52	26	0.7	919.516	76.85	7660000	11	F11:49267	170303_WF1_2.raw	8	8
LLDNWDSVTSTFSKL	81.52	1724.86	15	1.3	863.439	109.75	509000	10	F10:60975	WF5_80uL_long_2.raw	4	4	sp|P02647|APOA1_HUMAN
QAAVGTSAAPVPSDNH	81.36	1520.72	16	1.3	761.369	14.62	7650000	16	F16:4882	170303_WF3_2.raw	20	20	sp|P02649|APOE_HUMAN
TLEIPGNSDPNM(+15.99)IPDGDFNSYV	81.33	2410.06	22	4	1206.04	108.56	661000000	14	F14:55025	170303_WF2_2.raw	26	26		Oxidation (M)	M12:Oxidation (M):1000.00
DEPPQSPWDRVKDLAT	81.06	1852.9	16	2.2	927.457	80.71	42500000	11	F11:51856	170303_WF1_2.raw	9	9	sp|P02647|APOA1_HUMAN
SLKPSEAPELDEDEGF	80.65	1761.79	16	2.6	881.907	62.25	73300000	4	F4:31975	WF2_80uL_long_2.raw	17	17	sp|P33241|LSP1_HUMAN
VGAHAGEYGAEALER	80.62	1528.73	15	-2.8	765.369	17.03	122000000	9	F9:6881	WF5_80uL_long_1.raw	31	31	sp|P69905|HBA_HUMAN
STGKTFPGFFSPM(+15.99)LGE	80.31	1717.8	16	2.4	859.91	94.91	51800000	6	F6:40421	WF3_80uL_long_2.raw	17	16	sp|P02671|FIBA_HUMAN	Oxidation (M)	M13:Oxidation (M):1000.00
EIVLTQSPGTLSLSPGERA	80.07	1954.04	19	1.4	978.027	74.03	4900000	15	F15:27865	170303_WF3_1.raw	19	19
ILEDENDAM(+15.99)ADADRL	80.05	1705.75	15	0.4	853.881	45.96	499000	5	F5:19043	WF3_80uL_long_1.raw	10	10	sp|Q9BUN1|MENT_HUMAN	Oxidation (M)	M9:Oxidation (M):1000.00
STGKTFPGFFSPM(+15.99)LGEFV	79.98	1963.94	18	1.3	982.978	109.57	676000000	9	F9:55450	WF5_80uL_long_1.raw	26	26	sp|P02671|FIBA_HUMAN	Oxidation (M)	M13:Oxidation (M):1000.00
FDTASTGKTFPGFF	79.92	1521.71	14	1.6	761.865	100.35	47500000	6	F6:42809	WF3_80uL_long_2.raw	19	19	sp|P02671|FIBA_HUMAN
LTIDEKGTEAAGAM(+15.99)FL	79.85	1681.82	16	2.1	841.921	79.85	254000	10	F10:41298	WF5_80uL_long_2.raw	4	4	sp|P01009|A1AT_HUMAN	Oxidation (M)	M14:Oxidation (M):1000.00
YQKVVAGVANALAHKYH	79.72	1868.01	17	0.5	623.676	30.41	349000000	11	F11:17463	170303_WF1_2.raw	20	20	sp|P68871|HBB_HUMAN:sp|P02042|HBD_HUMAN
NSPLDEENLTQENQDR	79.69	1900.84	16	1.8	951.429	32.63	7650000	9	F9:15577	WF5_80uL_long_1.raw	24	24	sp|P01011|AACT_HUMAN
GEGDFLAEGGGVR	79.65	1262.59	13	2.8	632.304	38.2	18900000	8	F8:16734	WF4_80uL_long_2.raw	19	19	sp|P02671|FIBA_HUMAN
LGAFSDGLAHLDNL	79.54	1441.72	14	0.5	721.868	101.59	12600000	10	F10:54229	WF5_80uL_long_2.raw	9	9	sp|P68871|HBB_HUMAN:sp|P02042|HBD_HUMAN
AAWGKVGAHAGEYGAEA	79.52	1643.77	17	-2.1	822.89	22.8	190000	15	F15:9155	170303_WF3_1.raw	4	4	sp|P69905|HBA_HUMAN
PAPPPISGGGY	79.49	1011.5	11	1.5	506.759	37.84	34900000	5	F5:15523	WF3_80uL_long_1.raw	15	15	sp|P02675|FIBB_HUMAN
VFDEFKPLVEEPQN	79.1	1689.83	14	1.7	845.921	85.49	11800000	8	F8:38730	WF4_80uL_long_2.raw	19	19	sp|P02768|ALBU_HUMAN
LM(+15.99)IEQNTKSPLFM(+15.99)G	79	1639.79	14	3.6	820.908	55.29	57800000	9	F9:26470	WF5_80uL_long_1.raw	23	23	sp|P01009|A1AT_HUMAN	Oxidation (M)	M2:Oxidation (M):1000.00;M13:Oxidation (M):1000.00
VLGAFSDGLAHLD	78.95	1313.66	13	1.4	657.839	86.14	14800000	16	F16:32518	170303_WF3_2.raw	16	16	sp|P68871|HBB_HUMAN:sp|P02042|HBD_HUMAN
SLDKFLASVSTVLTSKYR	78.91	2014.11	18	1.7	1008.06	104.87	134000000	13	F13:63914	170303_WF2_1.raw	21	21	sp|P69905|HBA_HUMAN
SLAELGGHLDQQV	78.89	1365.69	13	1.8	683.853	58	487000000	5	F5:24433	WF3_80uL_long_1.raw	24	24	sp|P06727|APOA4_HUMAN
EEEAPAPEVGASKPEG	78.88	1595.73	16	1.9	798.875	17.84	18000000	1	F1:4308	WF1_80uL_long_1.raw	21	21	sp|P04004|VTNC_HUMAN
TLYSYKVQSTITSRM(+15.99)AT	78.69	1964.99	17	0.8	983.502	30.66	95700000	11	F11:17372	170303_WF1_2.raw	20	20	sp|P19823|ITIH2_HUMAN	Oxidation (M)	M15:Oxidation (M):1000.00
AVLTIDEKGTEAAGA	78.66	1444.74	15	3.7	723.38	31.37	34700000	5	F5:12573	WF3_80uL_long_1.raw	13	13	sp|P01009|A1AT_HUMAN
GIQGSDSVFSGFLLFPD	78.65	1784.86	17	4.9	893.443	117.73	43300000	1	F1:60923	WF1_80uL_long_1.raw	20	20	sp|P02747|C1QC_HUMAN
AAWGKVGAHAGEYGAEALERM(+15.99)	78.62	2189.03	21	0.9	730.685	39.99	3060000	9	F9:19335	WF5_80uL_long_1.raw	3	3	sp|P69905|HBA_HUMAN	Oxidation (M)	M21:Oxidation (M):1000.00
TLSGIGTLDGFR	78.58	1235.65	12	2.2	618.834	71.78	76700000	5	F5:30370	WF3_80uL_long_1.raw	30	30	sp|P02671|FIBA_HUMAN
GAEDSLADQAANEWGR	78.55	1688.74	16	0.6	845.377	63.4	1740000	5	F5:26515	WF3_80uL_long_1.raw	4	4	sp|P0DJI8|SAA1_HUMAN
VPPM(+15.99)EEDYPQFGSPK	78.38	1735.78	15	1.2	868.896	40.38	61800000	13	F13:23051	170303_WF2_1.raw	17	17	sp|P08697|A2AP_HUMAN	Oxidation (M)	M4:Oxidation (M):1000.00
PGSTGTWNPGSSER	78.33	1431.64	14	2	716.828	15.4	4830000	5	F5:4680	WF3_80uL_long_1.raw	8	8	sp|P02671|FIBA_HUMAN
FFDTASTGKTFPGFFSPM(+15.99)	78.2	1999.9	18	0.9	1000.96	106.35	126000000	13	F13:65359	170303_WF2_1.raw	23	22	sp|P02671|FIBA_HUMAN	Oxidation (M)	M18:Oxidation (M):1000.00
AQFVNWIDSIIQR	78.17	1588.84	13	3.7	795.428	112.07	54500000	11	F11:75679	170303_WF1_2.raw	32	32	sp|P08246|ELNE_HUMAN
M(+15.99)IEQNTKSPLFM(+15.99)G	78.17	1526.71	13	2.9	764.365	30.26	5490000	9	F9:14622	WF5_80uL_long_1.raw	8	8	sp|P01009|A1AT_HUMAN	Oxidation (M)	M1:Oxidation (M):1000.00;M12:Oxidation (M):1000.00
DALTNAVAHVDDM(+15.99)PNA	78.1	1668.74	16	1.6	835.379	66.96	5820000	6	F6:28580	WF3_80uL_long_2.raw	9	9	sp|P69905|HBA_HUMAN	Oxidation (M)	M13:Oxidation (M):1000.00
NFLSYFVELGTQPATQ	78.02	1813.89	16	0.5	907.952	118.34	208000000	1	F1:61845	WF1_80uL_long_1.raw	54	54	sp|P02652|APOA2_HUMAN
VYKVLKQVHPDTGISSK	77.85	1898.06	17	0.9	950.039	13.04	37100000	11	F11:4476	170303_WF1_2.raw	15	15
TGKTFPGFFSPM(+15.99)LGEFV	77.79	1876.91	17	0.6	939.461	109.7	43000000	16	F16:43862	170303_WF3_2.raw	17	17	sp|P02671|FIBA_HUMAN	Oxidation (M)	M12:Oxidation (M):1000.00
PNNPDWGTFEEV	77.76	1403.6	12	1.9	702.808	95.29	122000000	5	F5:40128	WF3_80uL_long_1.raw	18	18	sp|P02671|FIBA_HUMAN
LM(+15.99)IEQNTKSPLFM(+15.99)	77.76	1582.77	13	4.7	792.398	57.41	4260000	9	F9:27233	WF5_80uL_long_1.raw	8	8	sp|P01009|A1AT_HUMAN	Oxidation (M)	M2:Oxidation (M):1000.00;M13:Oxidation (M):1000.00
SEAEDASLLSFM(+15.99)QGYM(+15.99)K	77.72	1937.84	17	-0.1	969.927	73.15	99600	16	F16:27550	170303_WF3_2.raw	2	2	sp|P02656|APOC3_HUMAN	Oxidation (M)	M12:Oxidation (M):1000.00;M16:Oxidation (M):1000.00
HVEEDDDDELDSKL	77.7	1657.7	14	3.2	829.858	24.35	55900000	9	F9:11520	WF5_80uL_long_1.raw	24	24	sp|P52566|GDIR2_HUMAN
FSN(+.98)GADLSGVTEEAPLKLS	77.7	1934.95	19	-2.2	968.479	98.28	915000	6	F6:41596	WF3_80uL_long_2.raw	11	11	sp|P01009|A1AT_HUMAN	Deamidation (NQ)	N3:Deamidation (NQ):1000.00
DTASTGKTFPGFFSP	77.47	1558.73	15	1.8	780.374	93.22	238000000	16	F16:35186	170303_WF3_2.raw	19	19	sp|P02671|FIBA_HUMAN
SLAELGGHLDQQVEEFR	77.45	1926.94	17	0.9	964.48	78.07	35800000	15	F15:29379	170303_WF3_1.raw	21	21	sp|P06727|APOA4_HUMAN
NHAADQAGKEVEKL	77.32	1508.76	14	2.2	755.388	12.66	18500000	16	F16:3612	170303_WF3_2.raw	15	15	sp|Q6UWP8|SBSN_HUMAN
TYFPHFDLSHGSAQVK	77.3	1832.88	16	0.7	917.45	49.65	146000000	16	F16:18928	170303_WF3_2.raw	18	18	sp|P69905|HBA_HUMAN
FDTASTGKTFPGF	77.26	1374.65	13	1.1	688.331	70.59	28100000	13	F13:40451	170303_WF2_1.raw	19	19	sp|P02671|FIBA_HUMAN
HAGDVEGHLSFL	77.15	1280.61	12	0.7	641.315	50.09	103000000	13	F13:27674	170303_WF2_1.raw	30	30	sp|P06727|APOA4_HUMAN
AVLTIDEKGTEAAGAM(+15.99)F	77.15	1738.84	17	2	870.431	68.57	64800000	5	F5:29679	WF3_80uL_long_1.raw	67	67	sp|P01009|A1AT_HUMAN	Oxidation (M)	M16:Oxidation (M):1000.00
HAGDVEGHLSFLE	77.13	1409.66	13	2.1	705.837	49.39	74800000	20	F20:22532	170303_WF5_2.raw	21	21	sp|P06727|APOA4_HUMAN
EEEAPAPEVGASKPEGI	77.11	1708.82	17	1.2	855.416	34.1	67300000	4	F4:16359	WF2_80uL_long_2.raw	28	28	sp|P04004|VTNC_HUMAN
IVEGSDAEIGM(+15.99)SPWQV	77.11	1732.8	16	-0.5	867.406	96.77	47200000	6	F6:41044	WF3_80uL_long_2.raw	24	24	sp|P00734|THRB_HUMAN	Oxidation (M)	M11:Oxidation (M):1000.00
TLTAFGFASADLIEI	77.05	1567.81	15	2.3	784.916	117.66	5060000	1	F1:60846	WF1_80uL_long_1.raw	8	8	sp|P04114|APOB_HUMAN
IPSIQLFPGLREPEE	76.87	1723.91	15	2.3	862.966	104.36	15800000	5	F5:44712	WF3_80uL_long_1.raw	22	22	sp|Q03167|TGBR3_HUMAN
TLASDFEIGHFF	76.86	1382.65	12	3.4	692.335	109.34	1910000	10	F10:60624	WF5_80uL_long_2.raw	8	8	sp|Q99733|NP1L4_HUMAN
LFAQINQGESITHAL	76.83	1640.85	15	-0.6	821.433	80.32	1010000	15	F15:30293	170303_WF3_1.raw	12	12	sp|Q01518|CAP1_HUMAN
KLDDDLEHQGGHV	76.83	1461.68	13	2.3	731.851	13.3	53400000	11	F11:4689	170303_WF1_2.raw	27	27	sp|P01042|KNG1_HUMAN
VNPFRPGDSEPPPAPGA	76.76	1703.83	17	2.1	852.922	39.97	41200000	9	F9:19467	WF5_80uL_long_1.raw	20	20	sp|Q15942|ZYX_HUMAN
LGEFVSETESRGSESGIF	76.75	1929.9	18	-0.2	965.955	84.39	4320000	15	F15:32049	170303_WF3_1.raw	13	13	sp|P02671|FIBA_HUMAN
WGKVGAHAGEYGAEALE	76.71	1743.82	17	1.3	872.919	36.09	859000	16	F16:14157	170303_WF3_2.raw	5	5	sp|P69905|HBA_HUMAN
SFLSALEEYTKKLNTQ	76.69	1870.97	16	1.8	936.493	106.94	314000000	9	F9:53318	WF5_80uL_long_1.raw	15	15	sp|P02647|APOA1_HUMAN
DVIQTGVDNPGHPF	76.56	1494.71	14	-0.5	748.362	59.41	997000	16	F16:22467	170303_WF3_2.raw	14	14	sp|P06732|KCRM_HUMAN
FDTASTGKTFPGFFSP	76.44	1705.8	16	0.5	853.907	100.27	167000000	16	F16:37902	170303_WF3_2.raw	19	19	sp|P02671|FIBA_HUMAN
EEAPSLRPAPPPISGGGY	76.42	1793.89	18	3	897.957	57.65	4840000	18	F18:23245	170303_WF4_2.raw	5	5	sp|P02675|FIBB_HUMAN
LSDQVPDTESETRI	76.3	1588.76	14	2.8	795.389	36.19	29700000	16	F16:14169	170303_WF3_2.raw	21	21	sp|P01024|CO3_HUMAN
FLSSLTETIEGVDAEDGHGPGEQQ	76.26	2515.14	24	4.9	1258.58	101.13	11800000	16	F16:38124	170303_WF3_2.raw	14	14	sp|P00751|CFAB_HUMAN
VLGAFSDGLAHLDN	76.24	1427.7	14	1.8	714.861	80.87	1020000	15	F15:30584	170303_WF3_1.raw	8	8	sp|P68871|HBB_HUMAN:sp|P02042|HBD_HUMAN
AYQKVVAGVANALAHKYH	76.22	1939.04	18	0.6	647.355	45.56	133000000	11	F11:27162	170303_WF1_2.raw	14	14	sp|P68871|HBB_HUMAN:sp|P02042|HBD_HUMAN
TLTAFGFASADLI	76.18	1325.69	13	3.6	663.853	115.65	17600000	10	F10:65673	WF5_80uL_long_2.raw	19	19	sp|P04114|APOB_HUMAN
SAVTALWGKVNVD	76.12	1358.72	13	3.8	680.37	80.81	3950000	5	F5:33866	WF3_80uL_long_1.raw	8	8	sp|P68871|HBB_HUMAN
FFDTASTGKTFPGFFSPM(+15.99)LGE	76.07	2299.05	21	1.4	1150.53	109.22	5390000	16	F16:43411	170303_WF3_2.raw	9	9	sp|P02671|FIBA_HUMAN	Oxidation (M)	M18:Oxidation (M):1000.00
TYFPHFDLSHGSAQ	76.04	1605.72	14	1	803.869	60.16	637000000	16	F16:22826	170303_WF3_2.raw	31	31	sp|P69905|HBA_HUMAN
EDSLADQAANEWGR	75.95	1560.68	14	0.8	781.348	57.62	682000	5	F5:23838	WF3_80uL_long_1.raw	6	6	sp|P0DJI8|SAA1_HUMAN
VVSLGSPSGEVSHP	75.93	1350.68	14	2.8	676.348	27.31	7150000	7	F7:12519	WF4_80uL_long_1.raw	5	5	sp|P02765|FETUA_HUMAN
TIDEKGTEAAGAM(+15.99)F	75.86	1455.66	14	3.4	728.837	27.36	9590000	10	F10:12993	WF5_80uL_long_2.raw	16	16	sp|P01009|A1AT_HUMAN	Oxidation (M)	M13:Oxidation (M):1000.00
VAGVANALAHKYH	75.74	1349.72	13	2.2	675.869	13.29	582000000	9	F9:4350	WF5_80uL_long_1.raw	19	19	sp|P68871|HBB_HUMAN:sp|P02042|HBD_HUMAN
DVVM(+15.99)TQSPLSLPVTLGQPASI	75.58	2168.14	21	0.6	1085.08	114.46	3150000	11	F11:77731	170303_WF1_2.raw	15	15	sp|A0A075B6S6|KVD30_HUMAN:sp|P06310|KV230_HUMAN	Oxidation (M)	M4:Oxidation (M):1000.00
STGKTFPGFFSPM(+15.99)	75.57	1418.65	13	0.9	710.335	71.28	440000000	11	F11:45228	170303_WF1_2.raw	13	13	sp|P02671|FIBA_HUMAN	Oxidation (M)	M13:Oxidation (M):1000.00
SIQLFPGLREPEE	75.52	1513.78	13	1.9	757.898	88.95	27900000	5	F5:37584	WF3_80uL_long_1.raw	19	19	sp|Q03167|TGBR3_HUMAN
LISWYDNEFGYSNR	75.39	1762.8	14	1.1	882.406	92.91	4860000	5	F5:38868	WF3_80uL_long_1.raw	18	18	sp|P04406|G3P_HUMAN
GSESGIFTNTKESS	75.34	1442.65	14	4	722.336	18.71	18800000	5	F5:6623	WF3_80uL_long_1.raw	14	14	sp|P02671|FIBA_HUMAN
LHELQEKLSPLGEEM(+15.99)	75.09	1767.87	15	1.9	884.945	39.36	23500000	16	F16:15361	170303_WF3_2.raw	12	12	sp|P02647|APOA1_HUMAN	Oxidation (M)	M15:Oxidation (M):1000.00
STGKTFPGFF	75.01	1087.53	10	1.3	544.775	73.35	85400000	15	F15:28065	170303_WF3_1.raw	11	11	sp|P02671|FIBA_HUMAN
M(+15.99)GVVSLGSPSGEVSHP	74.78	1554.73	16	2.6	778.377	36.19	24200000	8	F8:15995	WF4_80uL_long_2.raw	9	9	sp|P02765|FETUA_HUMAN	Oxidation (M)	M1:Oxidation (M):1000.00
NSPLDEENLTQENQD	74.77	1744.74	15	2.8	873.379	49.34	25200000	9	F9:23348	WF5_80uL_long_1.raw	18	18	sp|P01011|AACT_HUMAN
DFGNDFVPPAPR	74.69	1330.63	12	3.4	666.325	67.09	69300000	9	F9:32281	WF5_80uL_long_1.raw	20	20	sp|Q9NQC3|RTN4_HUMAN
SFLGEAFDGARDM(+15.99)	74.69	1430.61	13	3.3	716.316	75.09	689000	16	F16:28168	170303_WF3_2.raw	4	4	sp|P0DJI8|SAA1_HUMAN:sp|P0DJI9|SAA2_HUMAN	Oxidation (M)	M13:Oxidation (M):1000.00
TGKTFPGFFSPM(+15.99)	74.65	1331.62	12	2.4	666.82	71.71	389000000	19	F19:33708	170303_WF5_1.raw	15	15	sp|P02671|FIBA_HUMAN	Oxidation (M)	M12:Oxidation (M):1000.00
GSESGIFTNTKE	74.51	1268.59	12	1.5	635.302	19.67	29800000	5	F5:7231	WF3_80uL_long_1.raw	11	11	sp|P02671|FIBA_HUMAN
VLTIDEKGTEAAGAM(+15.99)F	74.49	1667.81	16	1.7	834.913	60.21	36300000	16	F16:23295	170303_WF3_2.raw	29	29	sp|P01009|A1AT_HUMAN	Oxidation (M)	M15:Oxidation (M):1000.00
FFDTASTGKTFPGFFSP	74.47	1852.87	17	-0.4	927.441	107.34	37800000	16	F16:42266	170303_WF3_2.raw	15	15	sp|P02671|FIBA_HUMAN
STNIFFSPVSIATAFA	74.46	1671.85	16	4	836.936	117.71	857000	1	F1:60898	WF1_80uL_long_1.raw	4	4	sp|P01009|A1AT_HUMAN
LKQVHPDTGISSKAM(+15.99)GI	74.44	1796.95	17	0.5	899.481	14.19	1010000000	11	F11:5398	170303_WF1_2.raw	34	34		Oxidation (M)	M15:Oxidation (M):1000.00
FDLSHGSAQV	74.44	1059.5	10	4.8	530.759	33.51	119000000	14	F14:15831	170303_WF2_2.raw	17	17	sp|P69905|HBA_HUMAN
TALWGKVNVDEV	74.41	1329.69	12	2.1	665.855	72.66	58800000	5	F5:30288	WF3_80uL_long_1.raw	14	14	sp|P68871|HBB_HUMAN
HAGEYGAEALER	74.29	1301.6	12	1	651.808	13.6	109000000	15	F15:4224	170303_WF3_1.raw	34	34	sp|P69905|HBA_HUMAN
LASVSTVLTSKY	74.26	1267.7	12	1.6	634.86	56.19	18300000	10	F10:27273	WF5_80uL_long_2.raw	8	8	sp|P69905|HBA_HUMAN
TLYSYKVQSTI	74.26	1301.69	11	1.4	651.851	54.86	22500000	1	F1:21761	WF1_80uL_long_1.raw	11	11	sp|P19823|ITIH2_HUMAN
VHASLDKFLASV	74.19	1285.7	12	0.4	643.859	68.35	86200000	11	F11:42649	170303_WF1_2.raw	15	15	sp|P69905|HBA_HUMAN
GSSGTGGTATWKPGSSGP	74.15	1590.73	18	2.1	796.373	17.94	45200000	5	F5:6325	WF3_80uL_long_1.raw	16	16	sp|P02671|FIBA_HUMAN
FQTVTDYGKDLM(+15.99)E	74.12	1561.7	13	0.1	781.856	53.15	2230000	9	F9:24999	WF5_80uL_long_1.raw	9	9	sp|P02652|APOA2_HUMAN	Oxidation (M)	M12:Oxidation (M):1000.00
TFEYPSNAVEEVTQNNF	74.06	1987.88	17	4.7	994.952	106.29	39800000	16	F16:41422	170303_WF3_2.raw	32	32	sp|Q14624|ITIH4_HUMAN
DLGTLSGIGTLDG	74.03	1217.61	13	1.6	609.815	106.15	2710000	5	F5:46005	WF3_80uL_long_1.raw	5	5	sp|P02671|FIBA_HUMAN
YAALNSKATFYGEQV	73.87	1660.81	15	0.7	831.413	59.38	1160000	13	F13:33218	170303_WF2_1.raw	11	11	sp|P46940|IQGA1_HUMAN
SRQLGLPGPPDVPDHA	73.83	1654.84	16	2.2	828.43	43.67	209000000	16	F16:16804	170303_WF3_2.raw	30	30	sp|Q14624|ITIH4_HUMAN
LEAIPM(+15.99)SIPPEVKF	73.81	1585.84	14	0.2	793.929	94.51	61600000	10	F10:49723	WF5_80uL_long_2.raw	20	20	sp|P01009|A1AT_HUMAN	Oxidation (M)	M6:Oxidation (M):1000.00
SYFVELGTQPATQ	73.78	1439.69	13	1.1	720.855	81.6	22700000	4	F4:43889	WF2_80uL_long_2.raw	16	16	sp|P02652|APOA2_HUMAN
TPNLAEFAFSLYR	73.65	1527.77	13	3.8	764.896	109.95	830000	6	F6:49204	WF3_80uL_long_2.raw	8	8	sp|P01009|A1AT_HUMAN
LGTLSGIGTLDGFR	73.6	1405.76	14	1.8	703.887	89.97	10300000	15	F15:34081	170303_WF3_1.raw	18	17	sp|P02671|FIBA_HUMAN
SWYDNEFGYSNR	73.59	1536.63	12	-0.4	769.32	70.82	9250000	4	F4:37126	WF2_80uL_long_2.raw	9	9	sp|P04406|G3P_HUMAN
QGLLPVLESFKVSFL	73.59	1675.95	15	1.7	838.986	117.52	12800000	1	F1:60703	WF1_80uL_long_1.raw	14	14	sp|P02647|APOA1_HUMAN
GENFNKALVQQM(+15.99)EQL	73.58	1763.85	15	1.9	882.935	51.29	25400000	17	F17:21386	170303_WF4_1.raw	26	26	sp|P06727|APOA4_HUMAN	Oxidation (M)	M12:Oxidation (M):1000.00
LTIDEKGTEAAGAM(+15.99)F	73.54	1568.74	15	4.7	785.38	51.54	14700000	5	F5:21385	WF3_80uL_long_1.raw	20	20	sp|P01009|A1AT_HUMAN	Oxidation (M)	M14:Oxidation (M):1000.00
FQTVTDYGKDLM(+15.99)EKV	73.5	1788.86	15	4.9	895.442	61.26	10100000	10	F10:30140	WF5_80uL_long_2.raw	13	13	sp|P02652|APOA2_HUMAN	Oxidation (M)	M12:Oxidation (M):1000.00
FFDTASTGKTFPGFF	73.38	1668.78	15	1.7	835.4	108.08	12600000	5	F5:47620	WF3_80uL_long_1.raw	15	15	sp|P02671|FIBA_HUMAN
SRQLGLPGPPDVPDHAA	73.38	1725.88	17	-0.4	863.947	40.95	42200000	11	F11:23794	170303_WF1_2.raw	16	16	sp|Q14624|ITIH4_HUMAN
DDDLEHQGGHVLDHGH	73.34	1779.76	16	0.8	594.26	13.18	115000000	20	F20:4171	170303_WF5_2.raw	34	34	sp|P01042|KNG1_HUMAN
SESGSFRPDSPGSGNA	73.34	1550.66	16	-0.6	776.337	14.3	66900000	6	F6:4290	WF3_80uL_long_2.raw	18	18	sp|P02671|FIBA_HUMAN
VADALTNAVAHV	73.22	1179.62	12	1.4	590.821	56.19	3530000	16	F16:21296	170303_WF3_2.raw	16	16	sp|P69905|HBA_HUMAN
ADSGEGDFLAEGGGVR	73.21	1535.69	16	3.5	768.852	43.66	41300000	14	F14:20546	170303_WF2_2.raw	22	22	sp|P02671|FIBA_HUMAN
GEFVSETESRGSESGIFTNT	73.12	2132.95	20	2.8	1067.49	61.16	345000	16	F16:23115	170303_WF3_2.raw	3	3	sp|P02671|FIBA_HUMAN
RVLELPYQGEELSM(+15.99)V	73.09	1777.89	15	1.2	889.954	86.84	2670000	13	F13:51040	170303_WF2_1.raw	8	8	sp|P30740|ILEU_HUMAN	Oxidation (M)	M14:Oxidation (M):1000.00
QLGLPGPPDVPDHAA	73.06	1482.75	15	2.4	742.382	67.97	87000000	1	F1:28594	WF1_80uL_long_1.raw	19	19	sp|Q14624|ITIH4_HUMAN
SLVADENPFAQGALK	73.03	1558.8	15	0.6	780.407	73.09	945000	14	F14:34033	170303_WF2_2.raw	11	11	sp|P06396|GELS_HUMAN
DEKGTEAAGAM(+15.99)FL	73.02	1354.61	13	1	678.312	50.29	1990000	9	F9:23648	WF5_80uL_long_1.raw	6	6	sp|P01009|A1AT_HUMAN	Oxidation (M)	M11:Oxidation (M):1000.00
KLDDDLEHQGGHVL	73.01	1574.77	14	3.4	788.394	24.46	218000000	9	F9:11523	WF5_80uL_long_1.raw	34	33	sp|P01042|KNG1_HUMAN
GAHAGEYGAEALERM(+15.99)FL	73	1836.85	17	4	919.434	80.86	56300000	16	F16:30677	170303_WF3_2.raw	29	29	sp|P69905|HBA_HUMAN	Oxidation (M)	M15:Oxidation (M):1000.00
WGKVNVDEVGGEAL	72.88	1471.73	14	3.4	736.875	65.1	5200000	9	F9:30995	WF5_80uL_long_1.raw	13	13	sp|P68871|HBB_HUMAN
LDDDLEHQGGHVLDHGH	72.84	1892.84	17	1	631.955	16.94	122000000	15	F15:6126	170303_WF3_1.raw	26	26	sp|P01042|KNG1_HUMAN
FFDTASTGKTFPGFFSPM(+15.99)L	72.79	2112.99	19	2.9	1057.5	111.61	24400000	1	F1:55897	WF1_80uL_long_1.raw	26	26	sp|P02671|FIBA_HUMAN	Oxidation (M)	M18:Oxidation (M):1000.00
VHVSEEGTEPEAM(+15.99)L	72.78	1542.69	14	2	772.352	28.81	6210000	10	F10:13803	WF5_80uL_long_2.raw	16	16	sp|P06396|GELS_HUMAN	Oxidation (M)	M13:Oxidation (M):1000.00
GEYGAEALERM(+15.99)FL	72.76	1500.69	13	2.7	751.355	101.85	139000000	1	F1:48139	WF1_80uL_long_1.raw	46	46	sp|P69905|HBA_HUMAN	Oxidation (M)	M11:Oxidation (M):1000.00
SFLSALEEYTK	72.69	1286.64	11	3.3	644.329	105.51	70300000	14	F14:52466	170303_WF2_2.raw	21	21	sp|P02647|APOA1_HUMAN
DIQLTQSPSFLSASVGDRV	72.68	2019.03	19	1	1010.52	102.83	2010000	14	F14:50413	170303_WF2_2.raw	10	10	sp|A0A0C4DH69|KV109_HUMAN
QLDDYLNGRAV	72.66	1262.63	11	0.4	632.32	54.1	62000000	11	F11:32599	170303_WF1_2.raw	19	19	sp|P06396|GELS_HUMAN
VQAAVGTSAAPVPSDNH	72.58	1619.79	17	2.1	810.904	18.57	374000	17	F17:7217	170303_WF4_1.raw	3	3	sp|P02649|APOE_HUMAN
ALVILAKGAEEM(+15.99)ETV	72.56	1588.84	15	1.8	795.428	55.4	6370000	15	F15:21250	170303_WF3_1.raw	7	7	sp|Q99497|PARK7_HUMAN	Oxidation (M)	M12:Oxidation (M):1000.00
M(+15.99)VGM(+15.99)GQKDSYVGDEAQS	72.48	1832.76	17	1.5	917.386	13.35	8050000	9	F9:4400	WF5_80uL_long_1.raw	17	17	sp|P60709|ACTB_HUMAN:sp|P63261|ACTG_HUMAN:sp|P68032|ACTC_HUMAN:sp|P68133|ACTS_HUMAN	Oxidation (M)	M1:Oxidation (M):1000.00;M4:Oxidation (M):1000.00
KPEEEAPAPEVGASKPEGI	72.47	1933.96	19	-2	967.987	21.53	39500000	11	F11:10807	170303_WF1_2.raw	18	18	sp|P04004|VTNC_HUMAN
NSFVNDIFERI	72.42	1352.67	11	1.8	677.345	109.36	54100000	1	F1:54008	WF1_80uL_long_1.raw	20	20
YFPHFDLSHG	72.4	1218.55	10	1.2	610.281	57.17	871000000	11	F11:35499	170303_WF1_2.raw	30	30	sp|P69905|HBA_HUMAN
VLTIDEKGTEAAGA	72.37	1373.7	14	0.7	687.86	24.4	44300000	9	F9:11544	WF5_80uL_long_1.raw	17	17	sp|P01009|A1AT_HUMAN
SFLSALEEYTKKLNT	72.37	1742.91	15	3.3	872.465	106.8	109000000	5	F5:46508	WF3_80uL_long_1.raw	18	18	sp|P02647|APOA1_HUMAN
AAM(+15.99)STYTGIFTDQVLSVLKGEE	72.29	2375.16	22	1	1188.59	114.66	89100000	1	F1:58376	WF1_80uL_long_1.raw	28	28	sp|P02655|APOC2_HUMAN	Oxidation (M)	M3:Oxidation (M):1000.00
KLELDDVTSNM(+15.99)EQI	72.18	1649.78	14	2.8	825.9	59.82	515000	6	F6:25290	WF3_80uL_long_2.raw	5	5	sp|P12883|MYH7_HUMAN	Oxidation (M)	M11:Oxidation (M):1000.00
SRQ(+.98)LGLPGPPDVPDHA	72.18	1655.83	16	1.5	828.922	63.94	171000000	15	F15:24403	170303_WF3_1.raw	26	26	sp|Q14624|ITIH4_HUMAN	Deamidation (NQ)	Q3:Deamidation (NQ):1000.00
LVEQGFTVPEIKTI	72.14	1572.88	14	0.5	787.446	93.13	64700000	11	F11:60720	170303_WF1_2.raw	18	18	sp|P04114|APOB_HUMAN
KVDVDVPDVNIEGPDA	72.11	1680.82	16	-2.2	841.416	71.4	2030000	16	F16:26769	170303_WF3_2.raw	14	14	sp|Q09666|AHNK_HUMAN
SLPGAEGPDKPSVV	72.07	1351.7	14	1.2	676.857	29.07	13000000	15	F15:11632	170303_WF3_1.raw	16	16	sp|Q6UXB8|PI16_HUMAN
M(+15.99)NSFVNDIFERIAGEAS	72.05	1914.88	17	0.9	958.447	112.99	62100000	13	F13:70645	170303_WF2_1.raw	14	14		Oxidation (M)	M1:Oxidation (M):1000.00
SVSGSTGQWHSESGSF	72	1638.69	16	2.7	820.355	31.72	2600000	3	F3:18017	WF2_80uL_long_1.raw	10	10	sp|P02671|FIBA_HUMAN
TYFPHFDLSHGSA	71.97	1477.66	13	1.5	739.84	61.89	523000000	10	F10:30731	WF5_80uL_long_2.raw	25	25	sp|P69905|HBA_HUMAN
GTLSGIGTLDGFR	71.88	1292.67	13	2.3	647.345	74.6	2060000	5	F5:31236	WF3_80uL_long_1.raw	8	8	sp|P02671|FIBA_HUMAN
FSDGLAHLDNL	71.81	1200.58	11	-0.6	601.296	71.73	133000000	11	F11:45189	170303_WF1_2.raw	18	18	sp|P68871|HBB_HUMAN:sp|P02042|HBD_HUMAN
TSEYQTFFNPR	71.78	1388.64	11	1.7	695.326	56.75	1740000	15	F15:21566	170303_WF3_1.raw	3	3	sp|P00734|THRB_HUMAN
VYPWTQRFFESF	71.78	1605.76	12	1.9	803.89	110.31	99400000	11	F11:74126	170303_WF1_2.raw	14	14	sp|P68871|HBB_HUMAN:sp|P02042|HBD_HUMAN
TEAVLGGIYEYTLV	71.77	1526.79	14	1.2	764.402	114.01	1640000	1	F1:57841	WF1_80uL_long_1.raw	8	8	sp|P07358|CO8B_HUMAN
SESGIFTNTKE	71.7	1211.57	11	3	606.793	18.69	18500000	5	F5:6571	WF3_80uL_long_1.raw	11	11	sp|P02671|FIBA_HUMAN
TFQIPGYTVPVVNVEVSPF	71.57	2092.09	19	-0.7	1047.05	117.4	4770000	3	F3:82318	WF2_80uL_long_1.raw	10	10	sp|P04114|APOB_HUMAN
SLFSLGM(+15.99)GFDVDYDFLK	71.57	1968.92	17	0	985.466	115.95	3530000	1	F1:59399	WF1_80uL_long_1.raw	10	10	sp|P19823|ITIH2_HUMAN	Oxidation (M)	M7:Oxidation (M):1000.00
HASLDKFLASV	71.53	1186.63	11	1.1	594.325	61.65	57900000	14	F14:28670	170303_WF2_2.raw	19	19	sp|P69905|HBA_HUMAN
FLGEAFDGARDM(+15.99)	71.47	1343.58	12	2.3	672.8	52.36	2730000	5	F5:21720	WF3_80uL_long_1.raw	4	4	sp|P0DJI8|SAA1_HUMAN:sp|P0DJI9|SAA2_HUMAN	Oxidation (M)	M12:Oxidation (M):1000.00
ISWYDNEFGYSNR	71.46	1649.71	13	2.5	825.865	80.05	1110000	10	F10:41430	WF5_80uL_long_2.raw	5	5	sp|P04406|G3P_HUMAN
RLLLPGELAKHAVSEGTKAV	71.46	2088.21	20	1.5	523.059	87.99	113000000	1	F1:41584	WF1_80uL_long_1.raw	16	16
VDIDTPDIDIHGPEG	71.46	1591.74	15	2	796.877	76.2	1220000	10	F10:38994	WF5_80uL_long_2.raw	7	7	sp|Q09666|AHNK_HUMAN
GNYAERVGAGAPVYLAA	71.31	1677.85	17	4.4	839.935	59.81	8990000	9	F9:28359	WF5_80uL_long_1.raw	11	11
VLQSSGLYSLSSVV	71.24	1437.77	14	0.6	719.893	105.98	5610000	8	F8:48818	WF4_80uL_long_2.raw	17	17	sp|P0DOX5|IGG1_HUMAN
VSFLSALEEYTK	71.23	1385.71	12	2.8	693.863	107.56	31600000	15	F15:42633	170303_WF3_1.raw	17	17	sp|P02647|APOA1_HUMAN
HAGDVEGHLSF	71.22	1167.53	11	2	584.774	26.09	494000000	5	F5:10757	WF3_80uL_long_1.raw	37	36	sp|P06727|APOA4_HUMAN
LNHQLEGLTFQM(+15.99)	71.2	1445.7	12	2.4	723.858	55.93	14700000	8	F8:24845	WF4_80uL_long_2.raw	15	15	sp|P06727|APOA4_HUMAN	Oxidation (M)	M12:Oxidation (M):1000.00
AVGTSAAPVPSDNH	71.15	1321.63	14	0.4	661.821	13.23	352000	16	F16:4047	170303_WF3_2.raw	7	7	sp|P02649|APOE_HUMAN
AFGYVFPKAV	71.14	1097.59	10	0.3	549.803	73.49	2010000	11	F11:45921	170303_WF1_2.raw	8	8	sp|P04114|APOB_HUMAN
TLSLPELEQQQEQQ	71.13	1669.82	14	2.5	835.917	80.07	5460000	3	F3:53060	WF2_80uL_long_1.raw	9	9	sp|P06727|APOA4_HUMAN
NFLSYFVELGTQPAT	71.13	1685.83	15	1.7	843.924	117.57	85800000	3	F3:82533	WF2_80uL_long_1.raw	38	38	sp|P02652|APOA2_HUMAN
DKVNSFFSTF	71.11	1190.56	10	2.3	596.289	98.58	18800000	8	F8:44150	WF4_80uL_long_2.raw	18	18	sp|P06727|APOA4_HUMAN
VGAGAPVYLAAVLEYLTAEILELAGN	71.11	2616.41	26	3.7	1309.21	118.8	3330000	1	F1:61700	WF1_80uL_long_1.raw	15	15
M(+15.99)LGEFVSETESR	71.11	1399.63	12	3.1	700.824	35.28	6650000	5	F5:14262	WF3_80uL_long_1.raw	8	8	sp|P02671|FIBA_HUMAN	Oxidation (M)	M1:Oxidation (M):1000.00
SESGIFTNTKES	71.1	1298.6	12	-0.3	650.307	17.65	2240000	5	F5:5876	WF3_80uL_long_1.raw	4	4	sp|P02671|FIBA_HUMAN
PGPPDVPDHA	71.1	1000.46	10	1	501.238	19.29	31700000	1	F1:4743	WF1_80uL_long_1.raw	14	14	sp|Q14624|ITIH4_HUMAN
SYFEKSKEQLTPLI	71.05	1681.89	14	2.9	841.956	63.49	72000000	19	F19:29356	170303_WF5_1.raw	14	14	sp|P02652|APOA2_HUMAN
NVHSGSTFFKYY	71.04	1448.67	12	1.8	725.345	38.93	29200000	15	F15:15221	170303_WF3_1.raw	8	8	sp|Q14624|ITIH4_HUMAN
IFVGGLSPDTPEEKI	71.01	1600.83	15	-3	801.422	74.87	925000	10	F10:37918	WF5_80uL_long_2.raw	10	10	sp|Q14103|HNRPD_HUMAN
SWFEPLVEDM(+15.99)QR	70.97	1551.7	12	2.4	776.861	89.04	12500000	5	F5:37618	WF3_80uL_long_1.raw	16	16	sp|P02649|APOE_HUMAN	Oxidation (M)	M10:Oxidation (M):1000.00
SAVTALWGKVNVDEV	70.91	1586.83	15	0.1	794.423	99.04	3820000	16	F16:37024	170303_WF3_2.raw	14	14	sp|P68871|HBB_HUMAN
SWNSGSSGTGSTGNQNPGSPRPG	70.89	2187.95	23	-2.1	1094.98	14.29	1170000	3	F3:4379	WF2_80uL_long_1.raw	4	4	sp|P02671|FIBA_HUMAN
SLAELGGHLDQQVEEF	70.83	1770.84	16	3	886.431	94.62	309000000	7	F7:46309	WF4_80uL_long_1.raw	27	27	sp|P06727|APOA4_HUMAN
FLENVIRDAVTY	70.8	1438.75	12	4.8	720.384	101.76	102000000	16	F16:38524	170303_WF3_2.raw	21	21	sp|P62805|H4_HUMAN
QLGLPGPPDVPDHAAYHPF	70.79	2026.99	19	1.1	1014.5	83.53	100000000	16	F16:31549	170303_WF3_2.raw	16	16	sp|Q14624|ITIH4_HUMAN
REQLGPVTQEFWDNLE	70.79	1959.93	16	2.2	980.976	104.35	1640000	10	F10:56504	WF5_80uL_long_2.raw	3	3	sp|P02647|APOA1_HUMAN
SEYQTFFNPR	70.75	1287.59	10	1	644.802	52.75	6250000	16	F16:20153	170303_WF3_2.raw	6	6	sp|P00734|THRB_HUMAN
FTDQVLSVLKGEE	70.72	1463.75	13	2	732.884	88.62	25100000	6	F6:37926	WF3_80uL_long_2.raw	24	24	sp|P02655|APOC2_HUMAN
LIYDFIEDQGGLEAV	70.69	1680.82	15	-1.5	841.418	114.3	1050000	9	F9:59002	WF5_80uL_long_1.raw	7	7	sp|P42768|WASP_HUMAN
VWVLEEEGDEER	70.68	1488.67	12	-0.3	745.344	55	964000	10	F10:26577	WF5_80uL_long_2.raw	6	6	sp|Q0VD83|APOBR_HUMAN
FGYVFPKAV	70.68	1026.55	9	1.6	514.285	67.06	4800000	11	F11:41841	170303_WF1_2.raw	13	13	sp|P04114|APOB_HUMAN
GNYAERVGAGAPV	70.66	1259.63	13	1.8	630.821	22.02	20800000	9	F9:10030	WF5_80uL_long_1.raw	18	18	sp|Q6FI13|H2A2A_HUMAN
SLGSPSGEVSHP	70.63	1152.54	12	1	577.278	14.54	26400000	17	F17:4992	170303_WF4_1.raw	18	18	sp|P02765|FETUA_HUMAN
AVLTIDEKGTEA	70.58	1245.65	12	1.9	623.831	26.48	50300000	5	F5:10449	WF3_80uL_long_1.raw	17	17	sp|P01009|A1AT_HUMAN
TGKTFPGFF	70.56	1000.5	9	0.3	501.258	73.59	134000000	11	F11:47105	170303_WF1_2.raw	16	16	sp|P02671|FIBA_HUMAN
TYFPHFDLSHGSAQ(+.98)V	70.55	1705.77	15	3.8	853.897	76.85	156000000	11	F11:48357	170303_WF1_2.raw	15	15	sp|P69905|HBA_HUMAN	Deamidation (NQ)	Q14:Deamidation (NQ):1000.00
VHASLDKFLASVSTVLTSKY	70.54	2165.17	20	0.8	1083.59	107.07	193000000	14	F14:53698	170303_WF2_2.raw	18	18	sp|P69905|HBA_HUMAN
AVGKVIPELN(+.98)GKLTGM(+15.99)AF	70.52	1861	18	1	931.509	75.91	856000000	14	F14:35856	170303_WF2_2.raw	30	30	sp|P04406|G3P_HUMAN	Deamidation (NQ); Oxidation (M)	N10:Deamidation (NQ):1000.00;M16:Oxidation (M):1000.00
ALAAGGYDVEKN	70.52	1206.59	12	1.8	604.302	21.22	1990000	1	F1:5270	WF1_80uL_long_1.raw	8	8	sp|P16401|H15_HUMAN
AM(+15.99)GIM(+15.99)NSFVNDIFER	70.5	1774.8	15	4.6	888.412	99.43	2200000	15	F15:37712	170303_WF3_1.raw	14	14		Oxidation (M)	M2:Oxidation (M):1000.00;M5:Oxidation (M):1000.00
VLGAFSDGLAHLDNLK	70.49	1668.88	16	-2.1	835.447	84.62	687000	13	F13:49511	170303_WF2_1.raw	7	7	sp|P68871|HBB_HUMAN:sp|P02042|HBD_HUMAN
ELDESLQVAERLT	70.47	1501.76	13	3	751.891	79.12	34000000	10	F10:40944	WF5_80uL_long_2.raw	24	24	sp|P10909|CLUS_HUMAN
VLSNM(+15.99)GAHFGGYLV	70.43	1479.72	14	1.8	740.868	66.67	8100000	6	F6:28342	WF3_80uL_long_2.raw	13	13	sp|P13805|TNNT1_HUMAN	Oxidation (M)	M5:Oxidation (M):1000.00
LLPVLESFKVSFL	70.42	1490.87	13	3.4	746.447	115.68	4270000	9	F9:60030	WF5_80uL_long_1.raw	11	11	sp|P02647|APOA1_HUMAN
FFSFLGEAFDGARDM(+15.99)	70.42	1724.75	15	2.7	863.385	109.95	1620000	5	F5:48604	WF3_80uL_long_1.raw	11	11	sp|P0DJI8|SAA1_HUMAN:sp|P0DJI9|SAA2_HUMAN	Oxidation (M)	M15:Oxidation (M):1000.00
LGEFVSETESRGSESGIFTNT	70.39	2246.03	21	0.3	1124.02	81.05	21800000	16	F16:30596	170303_WF3_2.raw	14	14	sp|P02671|FIBA_HUMAN
AHAGEYGAEALER	70.36	1372.64	13	-1.3	687.325	13.97	25000000	10	F10:4768	WF5_80uL_long_2.raw	25	25	sp|P69905|HBA_HUMAN
FFDTASTGKTFPGF	70.34	1521.71	14	3.8	761.867	97.42	3220000	5	F5:40905	WF3_80uL_long_1.raw	15	15	sp|P02671|FIBA_HUMAN
HASLDKFLASVST	70.32	1374.71	13	4.9	688.368	58.88	6840000	11	F11:35984	170303_WF1_2.raw	7	7	sp|P69905|HBA_HUMAN
AAVPSGASTGIYEALELR	70.3	1803.94	18	0.1	902.976	93.89	4050000	9	F9:44956	WF5_80uL_long_1.raw	13	13	sp|P06733|ENOA_HUMAN:sp|P13929|ENOB_HUMAN
FFELEADEREPT	70.25	1481.67	12	4.7	741.844	59.58	11400000	9	F9:28324	WF5_80uL_long_1.raw	9	9	sp|P01019|ANGT_HUMAN
N(+.98)HAADQAGKEVEKL	70.2	1509.74	14	0.8	755.879	14.39	7780000	8	F8:4721	WF4_80uL_long_2.raw	9	9	sp|Q6UWP8|SBSN_HUMAN	Deamidation (NQ)	N1:Deamidation (NQ):78.33
LSDQVPDTESETRILL	70.14	1814.93	16	2.2	908.472	81.68	39200000	8	F8:37048	WF4_80uL_long_2.raw	6	6	sp|P01024|CO3_HUMAN
DGLILTSRGPGTSFEF	70.14	1695.85	16	1.4	848.932	105.69	103000	10	F10:57631	WF5_80uL_long_2.raw	2	2	sp|Q99497|PARK7_HUMAN
GLEEELQFSLGSKI	70.14	1548.8	14	3	775.411	107.05	66500000	1	F1:52021	WF1_80uL_long_1.raw	27	27
SESGIFTN(+.98)TKESS	70.13	1386.62	13	2.7	694.317	20.91	2940000	15	F15:8237	170303_WF3_1.raw	10	10	sp|P02671|FIBA_HUMAN	Deamidation (NQ)	N8:Deamidation (NQ):1000.00
TIEM(+15.99)SAFGYVFPKAV	70.1	1674.83	15	3.9	838.427	103.14	13100000	3	F3:69964	WF2_80uL_long_1.raw	26	26	sp|P04114|APOB_HUMAN	Oxidation (M)	M4:Oxidation (M):1000.00
DTASTGKTFPGF	70.04	1227.58	12	-0.2	614.796	53.23	33900000	9	F9:25016	WF5_80uL_long_1.raw	19	19	sp|P02671|FIBA_HUMAN
GDVYVNDAFGTAH	70.02	1364.6	13	-1.6	683.306	49.06	5850000	1	F1:18754	WF1_80uL_long_1.raw	12	12	sp|P00558|PGK1_HUMAN
LISLTDENALSGNEELTVK	70	2045.05	19	1	1023.53	91.17	103000	1	F1:42036	WF1_80uL_long_1.raw	3	3	sp|P14625|ENPL_HUMAN
QLGLPGPPDVPDH	69.97	1340.67	13	3.1	671.346	62.63	15300000	5	F5:26071	WF3_80uL_long_1.raw	13	13	sp|Q14624|ITIH4_HUMAN
TYTGIFTDQVLSVLKGEE	69.97	1999.01	18	1	1000.52	112.63	13000000	15	F15:45822	170303_WF3_1.raw	27	27	sp|P02655|APOC2_HUMAN
SGLIYEETRGVLKV	69.97	1562.87	14	1.9	782.442	64.58	962000000	15	F15:24647	170303_WF3_1.raw	30	30	sp|P62805|H4_HUMAN
LDDDLEHQGGHVL	69.88	1446.67	13	2.8	724.346	31.23	344000000	14	F14:14936	170303_WF2_2.raw	41	41	sp|P01042|KNG1_HUMAN
NFNEKLSQLQTYM(+15.99)I	69.87	1743.85	14	-0.6	872.932	84.55	10400000	9	F9:40910	WF5_80uL_long_1.raw	20	20	sp|P04114|APOB_HUMAN	Oxidation (M)	M13:Oxidation (M):1000.00
SLAPYAQDTQEKL	69.86	1462.73	13	1	732.373	38.63	239000000	16	F16:15090	170303_WF3_2.raw	28	28	sp|P06727|APOA4_HUMAN
AVLTIDEKGTEAA	69.78	1316.68	13	3.1	659.351	28.23	66400000	10	F10:13855	WF5_80uL_long_2.raw	15	15	sp|P01009|A1AT_HUMAN
SYFVELGTQPAT	69.76	1311.63	12	0.5	656.825	82.72	14000000	19	F19:39560	170303_WF5_1.raw	18	18	sp|P02652|APOA2_HUMAN
FLASVSTVLTSKY	69.76	1414.77	13	2.7	708.394	94.18	961000	1	F1:43528	WF1_80uL_long_1.raw	8	8	sp|P69905|HBA_HUMAN
TLSLPELEQQQEQQQE	69.74	1926.92	16	0.2	964.466	80.2	35300000	4	F4:43226	WF2_80uL_long_2.raw	22	22	sp|P06727|APOA4_HUMAN
DSGEGDFLAEGGGV	69.72	1308.55	14	1.2	655.282	86.47	67600000	15	F15:33054	170303_WF3_1.raw	22	22	sp|P02671|FIBA_HUMAN
SPAINVAVHVF	69.7	1152.63	11	1.4	577.323	73.71	1110000	8	F8:32963	WF4_80uL_long_2.raw	4	4	sp|P02766|TTHY_HUMAN
GDFLAEGGGVR	69.65	1076.53	11	2.2	539.271	29.2	39900000	17	F17:12483	170303_WF4_1.raw	31	31	sp|P02671|FIBA_HUMAN
VIDFEM(+15.99)QPIHEV	69.57	1471.7	12	1.9	736.86	63.36	18500000	10	F10:31551	WF5_80uL_long_2.raw	17	17	sp|P07357|CO8A_HUMAN	Oxidation (M)	M6:Oxidation (M):1000.00
HAGEYGAEALERM(+15.99)	69.57	1448.64	13	-2.4	725.323	15.68	95400000	20	F20:5628	170303_WF5_2.raw	18	18	sp|P69905|HBA_HUMAN	Oxidation (M)	M13:Oxidation (M):1000.00
GKTFPGFFSPM(+15.99)LGEFV	69.56	1775.86	16	2	888.939	109.78	19200000	6	F6:49248	WF3_80uL_long_2.raw	16	16	sp|P02671|FIBA_HUMAN	Oxidation (M)	M11:Oxidation (M):1000.00
DTQEKLNHQLEGLTF	69.53	1771.87	15	2.9	886.947	69.92	11600000	7	F7:33741	WF4_80uL_long_1.raw	7	7	sp|P06727|APOA4_HUMAN
KLSENTDFLAPGVSSF	69.51	1710.85	16	2.7	856.433	90.71	34500000	7	F7:43955	WF4_80uL_long_1.raw	12	12	sp|Q14515|SPRL1_HUMAN
YGAEALERM(+15.99)FL	69.47	1314.63	11	1.4	658.322	90.65	60400000	16	F16:34113	170303_WF3_2.raw	35	34	sp|P69905|HBA_HUMAN	Oxidation (M)	M9:Oxidation (M):1000.00
LVSQYFQTVTDYGKD	69.46	1762.84	15	2.8	882.43	80.94	26100	6	F6:34395	WF3_80uL_long_2.raw	2	2	sp|P02652|APOA2_HUMAN
SELTQQLNALF	69.46	1262.65	11	-0.3	632.332	111.9	35800000	16	F16:45123	170303_WF3_2.raw	20	20	sp|P06727|APOA4_HUMAN
GGSTSYGTGSETESPRNPSS	69.44	1956.83	20	3.8	979.426	12.69	198000	5	F5:3079	WF3_80uL_long_1.raw	1	1	sp|P02671|FIBA_HUMAN
SYDLDPGAGSLEI	69.4	1335.62	13	2.8	668.819	102.84	49200000	9	F9:49861	WF5_80uL_long_1.raw	22	22	sp|Q13790|APOF_HUMAN
DSHSLTTNIM(+15.99)EILR	69.37	1644.81	14	1.7	823.416	78.5	50100000	16	F16:29470	170303_WF3_2.raw	19	19	sp|P02671|FIBA_HUMAN	Oxidation (M)	M10:Oxidation (M):1000.00
AEDSLADQAANEWGR	69.35	1631.72	15	0.8	816.867	56.73	1520000	5	F5:23540	WF3_80uL_long_1.raw	4	4	sp|P0DJI8|SAA1_HUMAN
FVSETESRGSESGIF	69.35	1630.75	15	3.9	816.384	45.45	2810000	8	F8:20042	WF4_80uL_long_2.raw	6	6	sp|P02671|FIBA_HUMAN
TYFPHFDLSHG	69.35	1319.59	11	0.6	660.804	63.5	319000000	11	F11:39817	170303_WF1_2.raw	22	22	sp|P69905|HBA_HUMAN
LTTEEEFVEGIYKV	69.3	1655.83	14	2	828.924	103.25	2750000	10	F10:55557	WF5_80uL_long_2.raw	19	19	sp|P02766|TTHY_HUMAN
PNM(+15.99)IPDGDFNSYV	69.23	1483.63	13	2.3	742.823	90.06	16800000	6	F6:38487	WF3_80uL_long_2.raw	13	13		Oxidation (M)	M3:Oxidation (M):1000.00
M(+15.99)STYTGIFTDQVLSVLKGEE	69.21	2233.08	20	1.1	1117.55	113.33	12300000	11	F11:76770	170303_WF1_2.raw	30	30	sp|P02655|APOC2_HUMAN	Oxidation (M)	M1:Oxidation (M):1000.00
LGTM(+15.99)PAFEVSLQALQKA	69.21	1818.95	17	0.5	910.485	100.41	17000000	10	F10:53348	WF5_80uL_long_2.raw	21	21	sp|P04114|APOB_HUMAN	Oxidation (M)	M4:Oxidation (M):1000.00
SHHPGIAEFPSRG	69.17	1390.67	13	3.1	696.346	12.35	478000000	16	F16:3376	170303_WF3_2.raw	34	34	sp|P02671|FIBA_HUMAN
DQTVSDNELQEM(+15.99)	69.15	1423.58	12	3.7	712.798	27.68	2000000	5	F5:10881	WF3_80uL_long_1.raw	11	11	sp|P10909|CLUS_HUMAN	Oxidation (M)	M12:Oxidation (M):1000.00
AM(+15.99)STYTGIFTDQVLSVLKGEE	69.14	2304.12	21	4.7	1153.07	113.54	10700000	13	F13:70966	170303_WF2_1.raw	15	15	sp|P02655|APOC2_HUMAN	Oxidation (M)	M2:Oxidation (M):1000.00
DIVM(+15.99)TQSPDSLAV	69.14	1390.66	13	1.5	696.341	78.41	36700000	1	F1:34647	WF1_80uL_long_1.raw	19	19	sp|P06312|KV401_HUMAN	Oxidation (M)	M4:Oxidation (M):1000.00
TDYGKDLM(+15.99)EKV	69.11	1313.62	11	1.7	657.817	22.18	23600000	16	F16:8990	170303_WF3_2.raw	10	10	sp|P02652|APOA2_HUMAN	Oxidation (M)	M8:Oxidation (M):1000.00
SALEEYTKKLNTQ	69.1	1523.78	13	0.1	762.899	31.07	146000000	13	F13:16772	170303_WF2_1.raw	25	25	sp|P02647|APOA1_HUMAN
M(+15.99)NSFVNDIFERI	69.09	1499.71	12	1.6	750.862	108.15	876000000	4	F4:61813	WF2_80uL_long_2.raw	26	26		Oxidation (M)	M1:Oxidation (M):1000.00
WGKVGAHAGEY	69.08	1173.56	11	2	587.787	13.15	1300000	9	F9:4231	WF5_80uL_long_1.raw	9	9	sp|P69905|HBA_HUMAN
EGDFLAEGGGVR	69.07	1205.57	12	1.6	603.792	34.31	75100000	18	F18:14507	170303_WF4_2.raw	24	24	sp|P02671|FIBA_HUMAN
TLEIPGNSDPNM(+15.99)IPDGDFNSYVR	69.06	2566.16	23	0.6	1284.09	97.32	252000000	15	F15:37098	170303_WF3_1.raw	23	23		Oxidation (M)	M12:Oxidation (M):1000.00
VSQYFQTVTDYGKDLM(+15.99)E	69.06	2038.92	17	-0.4	1020.47	88.92	364000	7	F7:43007	WF4_80uL_long_1.raw	7	7	sp|P02652|APOA2_HUMAN	Oxidation (M)	M16:Oxidation (M):1000.00
LAPLAEDVRGNL	69.06	1266.69	12	-0.2	634.354	57.11	7050000	15	F15:21795	170303_WF3_1.raw	14	14	sp|P06727|APOA4_HUMAN
SVSTVLTSKY	69	1083.58	10	0.1	542.798	29.71	90100000	11	F11:16786	170303_WF1_2.raw	17	17	sp|P69905|HBA_HUMAN
ANM(+15.99)QAELVAKPSVSVEFV	68.94	1933.98	18	-1.5	967.997	79.27	798000	11	F11:49929	170303_WF1_2.raw	5	5	sp|P04114|APOB_HUMAN	Oxidation (M)	M3:Oxidation (M):1000.00
LFM(+15.99)GKVVNPTQ	68.93	1248.65	11	1.3	625.335	25.96	40300000	5	F5:10211	WF3_80uL_long_1.raw	20	20	sp|P01009|A1AT_HUMAN	Oxidation (M)	M3:Oxidation (M):1000.00
SLGM(+15.99)GFDVDYDFLK	68.91	1621.73	14	1	811.875	104.72	33200000	7	F7:51098	WF4_80uL_long_1.raw	16	16	sp|P19823|ITIH2_HUMAN	Oxidation (M)	M4:Oxidation (M):1000.00
PGVLSSRQLGLPGPPDVPDHAA	68.88	2179.14	22	1.3	727.388	69.07	20400000	17	F17:27889	170303_WF4_1.raw	7	7	sp|Q14624|ITIH4_HUMAN
DVYVNDAFGTAH	68.83	1307.58	12	1.5	654.797	53.74	3520000	1	F1:20809	WF1_80uL_long_1.raw	11	11	sp|P00558|PGK1_HUMAN
HELQEKLSPLGEEM(+15.99)	68.77	1654.79	14	0.9	828.402	27.17	24400000	8	F8:11674	WF4_80uL_long_2.raw	15	15	sp|P02647|APOA1_HUMAN	Oxidation (M)	M14:Oxidation (M):1000.00
FFESFGDLSTPDAV	68.67	1530.69	14	1.6	766.352	110.77	4560000	5	F5:49009	WF3_80uL_long_1.raw	15	15	sp|P68871|HBB_HUMAN
WGKVGAHAGEYGAEA	68.67	1501.69	15	2.3	751.856	16.26	550000	10	F10:6289	WF5_80uL_long_2.raw	7	7	sp|P69905|HBA_HUMAN
FLM(+15.99)IEQNTKSPLFM(+15.99)G	68.65	1786.86	15	0.7	894.44	82.51	414000	9	F9:40059	WF5_80uL_long_1.raw	4	4	sp|P01009|A1AT_HUMAN	Oxidation (M)	M3:Oxidation (M):1000.00;M14:Oxidation (M):1000.00
STSYGTGSETESPRNPS	68.65	1755.75	17	3.3	878.888	12.5	84400	5	F5:3021	WF3_80uL_long_1.raw	3	3	sp|P02671|FIBA_HUMAN
ALNLPTLPEVKFPEV	68.64	1665.93	15	3.1	833.977	109.47	32900000	19	F19:56467	170303_WF5_1.raw	16	16	sp|P04114|APOB_HUMAN
VLDLPDLPEDKLAQ	68.63	1564.83	14	3.8	783.428	95.31	12100000	8	F8:42812	WF4_80uL_long_2.raw	16	16	sp|Q9Y4L1|HYOU1_HUMAN
SIIDELFQDRF	68.61	1381.69	11	1.1	691.852	114.07	682000	16	F16:46370	170303_WF3_2.raw	6	6	sp|P10909|CLUS_HUMAN
TVHEQVGGPSLTSD	68.59	1425.67	14	4.3	713.847	18.65	201000	6	F6:6871	WF3_80uL_long_2.raw	3	3	sp|P04004|VTNC_HUMAN
NHQLEGLTFQM(+15.99)	68.59	1332.61	11	0.7	667.314	46.31	139000000	16	F16:17948	170303_WF3_2.raw	20	20	sp|P06727|APOA4_HUMAN	Oxidation (M)	M11:Oxidation (M):1000.00
VVAGVANALAHKYH	68.58	1448.79	14	-1.3	725.401	18.95	6110000	19	F19:7904	170303_WF5_1.raw	7	7	sp|P68871|HBB_HUMAN:sp|P02042|HBD_HUMAN
LGTLSGIGTLDGF	68.56	1249.66	13	1.9	625.836	109.4	774000	7	F7:54605	WF4_80uL_long_1.raw	6	6	sp|P02671|FIBA_HUMAN
PM(+15.99)FIVNTNVPR	68.54	1302.68	11	2	652.346	44.52	165000000	5	F5:18305	WF3_80uL_long_1.raw	32	32	sp|P14174|MIF_HUMAN	Oxidation (M)	M2:Oxidation (M):1000.00
FFESFGDLSTPDAVM(+15.99)GNPK	68.51	2073.94	19	-0.8	1037.97	97.55	0	1	F1:45103	WF1_80uL_long_1.raw	0	0	sp|P68871|HBB_HUMAN	Oxidation (M)	M15:Oxidation (M):1000.00
YFPHFDLSHGSAQ	68.5	1504.67	13	1.2	753.345	54.31	151000000	15	F15:20765	170303_WF3_1.raw	19	19	sp|P69905|HBA_HUMAN
FDTASTGKTFPG	68.48	1227.58	12	1.2	614.797	27.48	88500000	3	F3:15037	WF2_80uL_long_1.raw	17	17	sp|P02671|FIBA_HUMAN
ALWGKVNVDEV	68.46	1228.65	11	2.9	615.332	67.99	11000000	10	F10:34146	WF5_80uL_long_2.raw	17	17	sp|P68871|HBB_HUMAN
AIQLTYNPDESSKPNM(+15.99)I	68.42	1935.92	17	4.1	968.974	56.87	3560000	8	F8:25255	WF4_80uL_long_2.raw	21	21	sp|P02679|FIBG_HUMAN	Oxidation (M)	M16:Oxidation (M):1000.00
TAKDALSSVQESQV	68.41	1461.73	14	-0.4	731.873	28.06	4520000	11	F11:15301	170303_WF1_2.raw	12	12	sp|P02656|APOC3_HUMAN
DVSSALDKLKEFGNTL	68.4	1735.9	16	3.8	868.96	106.35	2440000	14	F14:53208	170303_WF2_2.raw	11	11	sp|P02654|APOC1_HUMAN
LAELGGHLDQQVEEF	68.38	1683.81	15	3	842.915	78.31	22000000	8	F8:35154	WF4_80uL_long_2.raw	16	16	sp|P06727|APOA4_HUMAN
SETESRGSESGIFTNT	68.37	1700.75	16	0.1	851.382	23.39	12800000	9	F9:10856	WF5_80uL_long_1.raw	20	20	sp|P02671|FIBA_HUMAN
TFQIPGYTVPVVN	68.35	1433.76	13	2	717.886	106.31	2650000	4	F4:59870	WF2_80uL_long_2.raw	7	7	sp|P04114|APOB_HUMAN
VSQYFQTVTDYGK	68.32	1534.73	13	4	768.375	53.65	429000	9	F9:25293	WF5_80uL_long_1.raw	5	5	sp|P02652|APOA2_HUMAN
ALAIVEALN(+.98)GKEV	68.31	1326.74	13	-1	664.376	79.64	570000	9	F9:38261	WF5_80uL_long_1.raw	5	5	sp|Q99497|PARK7_HUMAN	Deamidation (NQ)	N9:Deamidation (NQ):1000.00
SDQVPDTESETRI	68.31	1475.67	13	2.5	738.846	24.08	9470000	5	F5:9371	WF3_80uL_long_1.raw	18	18	sp|P01024|CO3_HUMAN
KVTSIQDWVQKTIAEN	68.3	1858.98	16	1.5	930.498	90.91	99200000	13	F13:53743	170303_WF2_1.raw	16	16	sp|P00738|HPT_HUMAN
M(+15.99)GIM(+15.99)NSFVNDIFERI	68.29	1816.85	15	1.3	909.433	110.69	23400000	11	F11:74459	170303_WF1_2.raw	32	32		Oxidation (M)	M1:Oxidation (M):1000.00;M4:Oxidation (M):1000.00
SLAELGGHLDQ(+.98)QVEEF	68.29	1771.83	16	4.5	886.924	97.78	26900000	11	F11:63619	170303_WF1_2.raw	5	5	sp|P06727|APOA4_HUMAN	Deamidation (NQ)	Q11:Deamidation (NQ):14.40
ADEFKVKIDQTVEEL	68.27	1762.9	15	2.6	882.459	82.28	17800000	18	F18:32205	170303_WF4_2.raw	10	10	sp|P06727|APOA4_HUMAN
SFLETESTFM(+15.99)TNQLV	68.26	1761.81	15	0.4	881.914	106.78	547000	3	F3:73081	WF2_80uL_long_1.raw	5	5	sp|Q14624|ITIH4_HUMAN	Oxidation (M)	M10:Oxidation (M):1000.00
PGGLLLGDVAPNF	68.24	1268.68	13	0.6	635.346	111.26	443000	6	F6:49913	WF3_80uL_long_2.raw	7	7	sp|P30041|PRDX6_HUMAN
GLPGPPDVPDH	68.19	1099.53	11	2.2	550.773	35.98	247000000	10	F10:17770	WF5_80uL_long_2.raw	18	18	sp|Q14624|ITIH4_HUMAN
YSTTAVVTNPKE	68.18	1308.66	12	1.9	655.337	15.5	197000	7	F7:5581	WF4_80uL_long_1.raw	2	2	sp|P02766|TTHY_HUMAN
TFPGFFSPM(+15.99)LGEFV	68.1	1590.74	14	1	796.38	117.57	114000000	20	F20:62985	170303_WF5_2.raw	16	16	sp|P02671|FIBA_HUMAN	Oxidation (M)	M9:Oxidation (M):1000.00
M(+15.99)ELERPGGN(+.98)EIT	68.07	1361.61	12	1.2	681.815	22.72	43000000	16	F16:9156	170303_WF3_2.raw	33	33	sp|P02671|FIBA_HUMAN	Oxidation (M); Deamidation (NQ)	M1:Oxidation (M):1000.00;N9:Deamidation (NQ):1000.00
LEVDETYVPKEF	68	1467.71	12	1.1	734.865	77.5	1360000	9	F9:37113	WF5_80uL_long_1.raw	6	6	sp|P02768|ALBU_HUMAN
LGPHAGDVEGHLSFLE	67.98	1676.82	16	3.8	839.418	67.6	11600000	10	F10:33833	WF5_80uL_long_2.raw	16	16	sp|P06727|APOA4_HUMAN
KLISWYDNEFGYSN	67.96	1734.79	14	3.6	868.405	95.04	918000	9	F9:45472	WF5_80uL_long_1.raw	5	5	sp|P04406|G3P_HUMAN
VNFLSYFVELGTQPATQ	67.96	1912.96	17	0.2	957.486	117.69	1450000	1	F1:60876	WF1_80uL_long_1.raw	10	10	sp|P02652|APOA2_HUMAN
DIQYPDATDEDI	67.96	1393.59	12	1.6	697.803	77.69	8530000	3	F3:51018	WF2_80uL_long_1.raw	7	7	sp|P10451|OSTP_HUMAN
TLSLPELEQQQE	67.93	1413.7	12	3.1	707.859	83.28	252000000	5	F5:35461	WF3_80uL_long_1.raw	19	19	sp|P06727|APOA4_HUMAN
SEAEDASLLSFM(+15.99)QGYM(+15.99)	67.93	1809.74	16	-1.2	905.878	101.81	888000	5	F5:43031	WF3_80uL_long_1.raw	9	9	sp|P02656|APOC3_HUMAN	Oxidation (M)	M12:Oxidation (M):1000.00;M16:Oxidation (M):1000.00
TYFPHFDLSHGS	67.89	1406.63	12	3.5	704.322	61.13	172000000	14	F14:28455	170303_WF2_2.raw	28	28	sp|P69905|HBA_HUMAN
GFFSPM(+15.99)LGEFV	67.89	1245.57	11	3.2	623.796	113.49	32900000	9	F9:58346	WF5_80uL_long_1.raw	20	20	sp|P02671|FIBA_HUMAN	Oxidation (M)	M6:Oxidation (M):1000.00
FFDSFGNLSSASAIMGNPK	67.84	1988.93	19	3.2	995.476	105.17	477000	4	F4:58956	WF2_80uL_long_2.raw	9	9	sp|P69891|HBG1_HUMAN:sp|P69892|HBG2_HUMAN
HFDLSHGSAQV	67.84	1196.56	11	1	599.287	19.58	32500000	19	F19:8314	170303_WF5_1.raw	15	15	sp|P69905|HBA_HUMAN
EFWDLDPEVRPT	67.82	1502.7	12	3.3	752.362	98.98	1500000	5	F5:41436	WF3_80uL_long_1.raw	3	3	sp|P02656|APOC3_HUMAN
SYSTTAVVTNPKE	67.8	1395.69	13	2.3	698.853	16.98	231000	8	F8:6334	WF4_80uL_long_2.raw	4	4	sp|P02766|TTHY_HUMAN
WHSESGSFRPDSPGSGNA	67.77	1873.8	18	-1.4	937.905	17.15	2610000	13	F13:7476	170303_WF2_1.raw	14	14	sp|P02671|FIBA_HUMAN
LGPHAGDVEGHLS	67.73	1287.62	13	0.9	644.818	15.72	135000000	11	F11:6716	170303_WF1_2.raw	33	33	sp|P06727|APOA4_HUMAN
SQDLGQHGLEEDFM(+15.99)	67.71	1620.67	14	-0.3	811.343	49.16	334000	9	F9:23148	WF5_80uL_long_1.raw	4	4	sp|P10124|SRGN_HUMAN	Oxidation (M)	M14:Oxidation (M):1000.00
TLEIPGNSDPNM(+15.99)IPDGDFNS	67.71	2147.93	20	2.3	1074.98	97.14	101000000	16	F16:36514	170303_WF3_2.raw	29	29		Oxidation (M)	M12:Oxidation (M):1000.00
TLSLPELEQQQEQ	67.71	1541.76	13	-0.3	771.886	80.54	19200000	13	F13:46659	170303_WF2_1.raw	11	11	sp|P06727|APOA4_HUMAN
SGSTGQWHSESGSF	67.7	1452.59	14	0.6	727.303	23.69	28700000	4	F4:10681	WF2_80uL_long_2.raw	16	16	sp|P02671|FIBA_HUMAN
VLKQVHPDTGISS	67.69	1379.74	13	0.2	690.878	12.77	2250000	8	F8:3548	WF4_80uL_long_2.raw	14	14
SLVIENEAGDER	67.65	1330.64	12	3.3	666.328	21.46	640000	10	F10:9614	WF5_80uL_long_2.raw	6	6	sp|P19823|ITIH2_HUMAN
FDIAVDGEPLGRV	67.63	1386.71	13	4.4	694.367	88.37	57000	5	F5:37262	WF3_80uL_long_1.raw	3	3	sp|P62937|PPIA_HUMAN
EEAPSLRPAPPPI	67.61	1372.73	13	3.2	687.377	48.12	3250000	18	F18:19737	170303_WF4_2.raw	4	4	sp|P02675|FIBB_HUMAN
ILDLTQNTYQHFY	67.58	1654.8	13	3.4	828.41	91.45	495000	11	F11:58905	170303_WF1_2.raw	7	7	sp|Q06033|ITIH3_HUMAN
LVVYPWTQRF	67.58	1307.7	10	2.5	654.86	93.43	22700000	9	F9:44815	WF5_80uL_long_1.raw	15	15	sp|P68871|HBB_HUMAN:sp|P02042|HBD_HUMAN:sp|P69891|HBG1_HUMAN:sp|P69892|HBG2_HUMAN
M(+15.99)QAELVAKPSVSVEFV	67.57	1748.9	16	-0.3	875.458	85.65	509000	1	F1:38735	WF1_80uL_long_1.raw	8	8	sp|P04114|APOB_HUMAN	Oxidation (M)	M1:Oxidation (M):1000.00
VSETESRGSESGIFTNT	67.55	1799.82	17	1.5	900.917	27.29	108000	16	F16:10860	170303_WF3_2.raw	3	3	sp|P02671|FIBA_HUMAN
SLGM(+15.99)GFDVDYDFL	67.52	1493.64	13	2	747.828	115.31	51900000	5	F5:51411	WF3_80uL_long_1.raw	19	19	sp|P19823|ITIH2_HUMAN	Oxidation (M)	M4:Oxidation (M):1000.00
LFAQINQGESITH	67.51	1456.73	13	1.2	729.374	47.27	2860000	16	F16:18109	170303_WF3_2.raw	20	20	sp|Q01518|CAP1_HUMAN
HAGDVEGHLSFLEK	67.5	1537.75	14	0.4	513.592	31.1	41500000	12	F12:14955	170303_WF1_3.raw	20	20	sp|P06727|APOA4_HUMAN
IFTDQVLSVLKGEE	67.5	1576.83	14	3.5	789.427	106.92	1010000	16	F16:41824	170303_WF3_2.raw	7	7	sp|P02655|APOC2_HUMAN
VDIEGPDVNIEGPEGKL	67.49	1779.89	17	-0.3	890.952	82.67	808000	4	F4:44198	WF2_80uL_long_2.raw	6	6	sp|Q09666|AHNK_HUMAN
VSFLSALEEYT	67.45	1257.61	11	1.9	629.815	116.22	26000000	9	F9:60447	WF5_80uL_long_1.raw	20	20	sp|P02647|APOA1_HUMAN
GSESGIFTN(+.98)TKESS	67.44	1443.64	14	1.8	722.827	21.71	3100000	11	F11:10927	170303_WF1_2.raw	3	3	sp|P02671|FIBA_HUMAN	Deamidation (NQ)	N9:Deamidation (NQ):1000.00
YDYYIRGATTTF	67.4	1469.68	12	3.1	735.851	68.62	187000	9	F9:32627	WF5_80uL_long_1.raw	7	7	sp|Q07507|DERM_HUMAN
AFSDGLAHLDNL	67.39	1271.61	12	-1	636.814	85.87	7790000	10	F10:45038	WF5_80uL_long_2.raw	16	16	sp|P68871|HBB_HUMAN:sp|P02042|HBD_HUMAN
SLQALQKATFQTPDFIVPL	67.39	2116.16	19	1.3	1059.09	110.4	52300000	19	F19:57173	170303_WF5_1.raw	14	14	sp|P04114|APOB_HUMAN
RVLLDQLGTTI	67.29	1227.72	11	0.6	614.867	77.5	97100000	13	F13:44715	170303_WF2_1.raw	20	20	sp|P04114|APOB_HUMAN
TFQIPGYTVPVVNVEV	67.28	1760.93	16	0.6	881.475	113.85	3330000	13	F13:71206	170303_WF2_1.raw	7	7	sp|P04114|APOB_HUMAN
SFLSALEEYTKKLN(+.98)TQ	67.27	1871.95	16	1.9	936.985	108.93	177000000	3	F3:75099	WF2_80uL_long_1.raw	20	20	sp|P02647|APOA1_HUMAN	Deamidation (NQ)	N14:Deamidation (NQ):8.22
LPPAGSPPDSHV	67.25	1172.58	12	1.7	587.3	20.5	18300000	1	F1:5358	WF1_80uL_long_1.raw	12	12	sp|P02765|FETUA_HUMAN
VIISAPSADAPM(+15.99)FV	67.23	1432.73	14	4.4	717.374	97.44	10000000	19	F19:47544	170303_WF5_1.raw	14	14	sp|P04406|G3P_HUMAN	Oxidation (M)	M12:Oxidation (M):1000.00
SLDKFLASVST	67.22	1166.62	11	1	584.317	75.74	120000000	3	F3:49724	WF2_80uL_long_1.raw	17	17	sp|P69905|HBA_HUMAN
FFDTASTGKTFPGFFSPM(+15.99)LGEFV	67.2	2545.19	23	2.9	1273.6	115.23	83200000	17	F17:48851	170303_WF4_1.raw	19	19	sp|P02671|FIBA_HUMAN	Oxidation (M)	M18:Oxidation (M):1000.00
NWRDPDQTDGLGLSYL	67.16	1848.86	16	-1.5	925.438	102.72	923000	10	F10:55120	WF5_80uL_long_2.raw	4	4	sp|P06396|GELS_HUMAN
GLSPGVTYYFKVFAV	67.12	1646.87	15	1.2	824.444	110.64	4740000	17	F17:45983	170303_WF4_1.raw	12	12	sp|P02751|FINC_HUMAN
IQLVEEELDRAQE	67.1	1570.78	13	-1.3	786.398	61.36	353000	9	F9:29047	WF5_80uL_long_1.raw	11	11	sp|P07951|TPM2_HUMAN:sp|P09493|TPM1_HUMAN
LEIPGNSDPNM(+15.99)IPDGDFN	67.07	1959.85	18	0.6	980.934	94.32	4440000	4	F4:51361	WF2_80uL_long_2.raw	4	4		Oxidation (M)	M11:Oxidation (M):1000.00
DTGTYEDFVEGLR	67.06	1500.67	13	1.4	751.345	95.69	377000	5	F5:40002	WF3_80uL_long_1.raw	5	5	sp|P08590|MYL3_HUMAN
YFQTVTDYGKDL	67.05	1448.68	12	-0.9	725.348	69.03	112000	6	F6:29325	WF3_80uL_long_2.raw	1	1	sp|P02652|APOA2_HUMAN
NILENKEGLELL	67.04	1383.76	12	2.5	692.889	90.12	10600000	10	F10:47327	WF5_80uL_long_2.raw	12	12	sp|P06733|ENOA_HUMAN
TYNPDESSKPNM(+15.99)I	67.01	1510.66	13	1.6	756.339	19.61	16300000	1	F1:4842	WF1_80uL_long_1.raw	19	19	sp|P02679|FIBG_HUMAN	Oxidation (M)	M12:Oxidation (M):1000.00
LSDQVPDTESET	66.98	1319.57	12	1.9	660.795	26.32	44500000	9	F9:12599	WF5_80uL_long_1.raw	17	17	sp|P01024|CO3_HUMAN
SLAELGGHLDQQ	66.98	1266.62	12	1.6	634.318	37.59	17100000	14	F14:17792	170303_WF2_2.raw	14	14	sp|P06727|APOA4_HUMAN
TPYADEFKV	66.97	1068.51	9	1.9	535.265	48.04	36300000	5	F5:19970	WF3_80uL_long_1.raw	14	14	sp|P06727|APOA4_HUMAN
SGIGTLDGFR	66.94	1021.52	10	0	511.767	45.4	122000000	15	F15:17516	170303_WF3_1.raw	34	33	sp|P02671|FIBA_HUMAN
HLLDDN(+.98)GQDKPV	66.92	1350.64	12	-0.9	676.327	17.23	3210000	9	F9:7211	WF5_80uL_long_1.raw	11	11	sp|P20810|ICAL_HUMAN	Deamidation (NQ)	N6:Deamidation (NQ):33.18
AFFDTASTGKTFPGFFSPM(+15.99)LGEFV	66.92	2616.22	24	2.9	1309.12	116.48	22400000	13	F13:73125	170303_WF2_1.raw	14	14	sp|P02671|FIBA_HUMAN	Oxidation (M)	M19:Oxidation (M):1000.00
LLEPGM(+15.99)ELGITAALTGI	66.91	1713.92	17	0.9	857.969	116.4	26500000	11	F11:79319	170303_WF1_2.raw	19	19	sp|O14791|APOL1_HUMAN	Oxidation (M)	M6:Oxidation (M):1000.00
PLFM(+15.99)GKVVNPTQ	66.91	1345.71	12	2.3	673.862	33.92	1430000	20	F20:15481	170303_WF5_2.raw	2	2	sp|P01009|A1AT_HUMAN	Oxidation (M)	M4:Oxidation (M):1000.00
VLEYLTAEILEL	66.9	1404.78	12	2.9	703.397	117.74	12100000	1	F1:60929	WF1_80uL_long_1.raw	14	14	sp|Q6FI13|H2A2A_HUMAN:sp|O75367|H2AY_HUMAN
SEETKENEGFTV	66.9	1368.6	12	1.2	685.31	22.09	27800000	10	F10:9971	WF5_80uL_long_2.raw	15	15	sp|P01024|CO3_HUMAN
GKTFPGFFSPM(+15.99)	66.89	1230.57	11	-1.3	616.294	72.09	34100000	11	F11:45545	170303_WF1_2.raw	14	14	sp|P02671|FIBA_HUMAN	Oxidation (M)	M11:Oxidation (M):1000.00
SLPEGVANGIEVYSTKI	66.89	1775.93	17	4.4	888.976	100.24	475000	1	F1:46711	WF1_80uL_long_1.raw	7	7	sp|Q06033|ITIH3_HUMAN
GDVEGHLSFL	66.88	1072.52	10	-0.3	537.267	68.97	96400000	13	F13:39281	170303_WF2_1.raw	8	8	sp|P06727|APOA4_HUMAN
IM(+15.99)NSFVNDIFERI	66.87	1612.79	13	-0.2	807.403	109.32	3680000	10	F10:60607	WF5_80uL_long_2.raw	17	17		Oxidation (M)	M2:Oxidation (M):1000.00
STGKTFPGFFSPM(+15.99)L	66.83	1531.74	14	1	766.877	98.57	64400000	6	F6:41950	WF3_80uL_long_2.raw	15	15	sp|P02671|FIBA_HUMAN	Oxidation (M)	M13:Oxidation (M):1000.00
QRIFENGYDPVNLLNDIV	66.8	2118.07	18	0.9	1060.05	113.54	3590000	11	F11:76954	170303_WF1_2.raw	4	4	sp|P08246|ELNE_HUMAN
PGVLSSRQ(+.98)LGLPGPPDVPDHA	66.79	2109.09	21	-2	1055.55	92.45	34800000	16	F16:34609	170303_WF3_2.raw	19	19	sp|Q14624|ITIH4_HUMAN	Deamidation (NQ)	Q8:Deamidation (NQ):1000.00
NSPLDEENLTQEN	66.75	1501.65	13	1.3	751.835	46.97	5990000	9	F9:22293	WF5_80uL_long_1.raw	15	15	sp|P01011|AACT_HUMAN
GKTFPGFFSPM(+15.99)L	66.73	1343.66	12	1.9	672.838	98.93	3930000	5	F5:41578	WF3_80uL_long_1.raw	14	14	sp|P02671|FIBA_HUMAN	Oxidation (M)	M11:Oxidation (M):1000.00
GNYAERVGAGAPVYM(+15.99)AA	66.72	1711.8	17	1.7	856.908	35.36	11600000	11	F11:20355	170303_WF1_2.raw	17	17	sp|Q6FI13|H2A2A_HUMAN	Oxidation (M)	M15:Oxidation (M):1000.00
AAVLEYLTAEILEL	66.71	1546.85	14	1.8	774.433	118	1460000	1	F1:61178	WF1_80uL_long_1.raw	8	8	sp|Q6FI13|H2A2A_HUMAN:sp|O75367|H2AY_HUMAN
GSESGIFTN(+.98)TKE	66.71	1269.57	12	3.1	635.795	22.48	6190000	6	F6:9025	WF3_80uL_long_2.raw	10	10	sp|P02671|FIBA_HUMAN	Deamidation (NQ)	N9:Deamidation (NQ):1000.00
SSAALSASYKADTV	66.7	1369.67	14	2.1	685.845	24.04	542000	4	F4:10586	WF2_80uL_long_2.raw	2	2	sp|P04114|APOB_HUMAN
LNLPTLPEVKFPEVDVL	66.7	1922.08	17	1	962.046	113.79	4600000	13	F13:71153	170303_WF2_1.raw	5	5	sp|P04114|APOB_HUMAN
SEGPLKGILGY	66.69	1132.61	11	0.8	567.314	79.31	49100000	20	F20:37616	170303_WF5_2.raw	12	12	sp|P04406|G3P_HUMAN
RVTEPISAESGEQVER	66.66	1785.89	16	2.3	596.304	14.32	2220000	8	F8:4667	WF4_80uL_long_2.raw	8	8	sp|O14791|APOL1_HUMAN
TFEYPSNAVEEVTQN(+.98)NF	66.65	1988.86	17	2.4	995.442	105.49	2100000	9	F9:51887	WF5_80uL_long_1.raw	11	11	sp|Q14624|ITIH4_HUMAN	Deamidation (NQ)	N15:Deamidation (NQ):14.02
LLVVYPWTQRFFESF	66.65	1931	15	3.8	966.51	116.88	12000000	9	F9:60939	WF5_80uL_long_1.raw	10	10	sp|P68871|HBB_HUMAN:sp|P02042|HBD_HUMAN
AEGPEVDVNLPK	66.63	1266.65	12	1.1	634.331	39.14	655000	8	F8:17055	WF4_80uL_long_2.raw	2	2	sp|Q09666|AHNK_HUMAN
HVLLAAPPGHQ	66.62	1138.62	11	1.2	570.32	13.59	2670000	16	F16:4277	170303_WF3_2.raw	7	7	sp|P02765|FETUA_HUMAN
DLGDVGPPIPSPGF	66.61	1366.68	14	4.2	684.348	110.95	700000	3	F3:76844	WF2_80uL_long_1.raw	7	7	sp|Q6UX06|OLFM4_HUMAN
VFSN(+.98)GADLSGVTEEAPLKLS	66.58	2034.02	20	3.3	1018.02	101.43	5590000	20	F20:50509	170303_WF5_2.raw	11	11	sp|P01009|A1AT_HUMAN	Deamidation (NQ)	N4:Deamidation (NQ):1000.00
LEVDETYVPKE	66.58	1320.64	11	1.6	661.331	41.48	1350000	10	F10:19901	WF5_80uL_long_2.raw	13	13	sp|P02768|ALBU_HUMAN
LVSQYFQTVTDYGKDLM(+15.99)E	66.52	2152	18	-0.3	1077.01	103.48	3170000	18	F18:40253	170303_WF4_2.raw	14	14	sp|P02652|APOA2_HUMAN	Oxidation (M)	M17:Oxidation (M):1000.00
DIQM(+15.99)TQSPSTLSASVGDRV	66.51	2006.96	19	-2.3	1004.48	55.75	17100000	3	F3:34557	WF2_80uL_long_1.raw	14	14	sp|P01602|KV105_HUMAN	Oxidation (M)	M4:Oxidation (M):1000.00
SSDFNSDTHSSTF	66.51	1430.56	13	0.4	716.287	22.28	7310000	10	F10:10067	WF5_80uL_long_2.raw	11	11	sp|P04406|G3P_HUMAN
VHLTPEEKSAVT	66.5	1309.69	12	0.5	655.851	12.57	55900000	11	F11:4077	170303_WF1_2.raw	20	20	sp|P68871|HBB_HUMAN
HGAGGGPPPAPPLPA	66.48	1291.67	15	2.3	646.842	27.43	52300000	3	F3:15994	WF2_80uL_long_1.raw	12	12	sp|P50552|VASP_HUMAN
TIDEKGTEAAGAM(+15.99)FL	66.46	1568.74	15	0.5	785.377	58.26	2280000	10	F10:28592	WF5_80uL_long_2.raw	7	7	sp|P01009|A1AT_HUMAN	Oxidation (M)	M13:Oxidation (M):1000.00
SLEDKTERELLESY	66.44	1710.83	14	3.1	856.426	67.17	10200000	5	F5:28055	WF3_80uL_long_1.raw	8	8	sp|P00734|THRB_HUMAN
EFVSETESRGSESGIF	66.35	1759.79	16	3	880.905	61.05	1580000	7	F7:29017	WF4_80uL_long_1.raw	3	3	sp|P02671|FIBA_HUMAN
DDDLEHQGGHVL	66.35	1333.59	12	0.9	667.803	22.92	637000000	13	F13:12003	170303_WF2_1.raw	36	36	sp|P01042|KNG1_HUMAN
TGKTFPGF	66.31	853.433	8	0	427.724	34.94	29000000	14	F14:16714	170303_WF2_2.raw	13	13	sp|P02671|FIBA_HUMAN
AIADKPGEDAEATPV	66.25	1482.72	15	1.7	742.369	24.33	34400000	1	F1:6774	WF1_80uL_long_1.raw	14	14	sp|Q06033|ITIH3_HUMAN
YTIAALLSPYSYSTTAVVTNPKE	66.24	2488.27	23	1.5	1245.15	108	2620000	7	F7:53380	WF4_80uL_long_1.raw	7	7	sp|P02766|TTHY_HUMAN
VVSLGSPSGEVSHPR	66.21	1506.78	15	0.9	754.398	14.89	375000	7	F7:5235	WF4_80uL_long_1.raw	6	6	sp|P02765|FETUA_HUMAN
AELGGHLDQQVEEF	66.2	1570.73	14	1.1	786.371	62.66	102000000	8	F8:28358	WF4_80uL_long_2.raw	18	18	sp|P06727|APOA4_HUMAN
VAEAFLSSLTETI	66.19	1379.72	13	1	690.867	113.5	3340000	5	F5:50555	WF3_80uL_long_1.raw	8	8	sp|P00751|CFAB_HUMAN
PNM(+15.99)IPDGDFNSYVR	66.17	1639.73	14	-0.2	820.872	59.26	5980000	15	F15:22593	170303_WF3_1.raw	6	6		Oxidation (M)	M3:Oxidation (M):1000.00
IQSDDDWIPDIQIDPNG	66.17	1939.88	17	5.1	970.952	112.16	6140000	8	F8:52717	WF4_80uL_long_2.raw	12	12	sp|P01042|KNG1_HUMAN
FFSPM(+15.99)LGEFV	66.14	1188.55	10	0.4	595.284	111.38	128000000	15	F15:45352	170303_WF3_1.raw	17	17	sp|P02671|FIBA_HUMAN	Oxidation (M)	M5:Oxidation (M):1000.00
SESGIFTNTKESS	66.11	1385.63	13	0.2	693.823	17.75	2910000	8	F8:6939	WF4_80uL_long_2.raw	7	7	sp|P02671|FIBA_HUMAN
NFLSYFVELGTQPA	66.07	1584.78	14	2	793.4	117.62	14600000	2	F2:63214	WF1_80uL_long_2.raw	20	20	sp|P02652|APOA2_HUMAN
TGGM(+15.99)VLKLEQGENV	66.06	1489.74	14	2.8	745.882	36.18	19900000	3	F3:21450	WF2_80uL_long_1.raw	22	22	sp|P02746|C1QB_HUMAN	Oxidation (M)	M4:Oxidation (M):1000.00
PDWGTFEEVSGNVSPGTR	66.05	1933.88	18	0.4	967.948	82.14	824000	6	F6:34927	WF3_80uL_long_2.raw	4	4	sp|P02671|FIBA_HUMAN
TFQIPGYTVPVVNV	66.02	1532.82	14	2.7	767.421	111.07	3970000	3	F3:76949	WF2_80uL_long_1.raw	16	16	sp|P04114|APOB_HUMAN
GVVSLGSPSGEVSHPRKT	66.02	1792.94	18	3.7	897.482	12.9	15200	8	F8:3660	WF4_80uL_long_2.raw	1	1	sp|P02765|FETUA_HUMAN
LEEELQFSLGSKI	65.99	1491.78	13	2.3	746.9	93.07	234000	5	F5:38934	WF3_80uL_long_1.raw	2	2
RVEPYGENFNK	65.98	1351.65	11	0	451.558	13.18	2290000	16	F16:4009	170303_WF3_2.raw	10	10	sp|P06727|APOA4_HUMAN
VLTIDEKGTEA	65.97	1174.61	11	0.9	588.312	20.06	30000000	15	F15:7830	170303_WF3_1.raw	14	14	sp|P01009|A1AT_HUMAN
SWYDNEFGYSN	65.96	1380.53	11	1.1	691.271	98.33	3220000	1	F1:45464	WF1_80uL_long_1.raw	4	4	sp|P04406|G3P_HUMAN
TDQVLSVLKGEE	65.94	1316.68	12	2.5	659.35	58.64	65100000	16	F16:22202	170303_WF3_2.raw	23	23	sp|P02655|APOC2_HUMAN
VIPELN(+.98)GKLTGM(+15.99)AF	65.94	1505.78	14	1.9	753.899	88.23	18800000	11	F11:56894	170303_WF1_2.raw	14	14	sp|P04406|G3P_HUMAN	Deamidation (NQ); Oxidation (M)	N6:Deamidation (NQ):1000.00;M12:Oxidation (M):1000.00
RVEPYGENFN	65.93	1223.56	10	0.9	612.786	21.46	3280000	8	F8:8957	WF4_80uL_long_2.raw	4	4	sp|P06727|APOA4_HUMAN
DLGDVGPPIPSPGFS	65.91	1453.71	15	1.7	727.863	107.88	847000	3	F3:74077	WF2_80uL_long_1.raw	4	4	sp|Q6UX06|OLFM4_HUMAN
FLASVSTVLTSK	65.89	1251.71	12	1.6	626.862	64.67	2360000	9	F9:30681	WF5_80uL_long_1.raw	10	10	sp|P69905|HBA_HUMAN
SEDAGGAEGETPHM(+15.99)L	65.88	1515.61	15	3.1	758.817	19.58	1010000	1	F1:4755	WF1_80uL_long_1.raw	8	8	sp|Q92954|PRG4_HUMAN	Oxidation (M)	M14:Oxidation (M):1000.00
LPVLESFKVSFL	65.85	1377.79	12	1.1	689.903	111.14	460000	4	F4:63568	WF2_80uL_long_2.raw	3	3	sp|P02647|APOA1_HUMAN
GLVEKVQAAVGTS	65.84	1257.69	13	1.6	629.855	52.53	2160000	8	F8:23200	WF4_80uL_long_2.raw	2	2	sp|P02649|APOE_HUMAN
FDTASTGKTFPGFFSPM(+15.99)L	65.84	1965.92	18	3.8	983.97	106.59	66900000	14	F14:53296	170303_WF2_2.raw	20	20	sp|P02671|FIBA_HUMAN	Oxidation (M)	M17:Oxidation (M):1000.00
AHAGEYGAEALERM(+15.99)	65.83	1519.67	14	2.9	760.846	15.82	4000000	9	F9:6092	WF5_80uL_long_1.raw	8	8	sp|P69905|HBA_HUMAN	Oxidation (M)	M14:Oxidation (M):1000.00
AGVANALAHKYH	65.81	1250.65	12	0.3	626.333	13.58	18400000	11	F11:4917	170303_WF1_2.raw	17	17	sp|P68871|HBB_HUMAN:sp|P02042|HBD_HUMAN
EIVLTQSPATLSLSPGERA	65.8	1968.05	19	3.5	985.037	80.05	605000	4	F4:42634	WF2_80uL_long_2.raw	8	8
M(+15.99)LGEFVSETESRGSESGIFT	65.79	2177.98	20	-0.7	1090	88.08	1680000	15	F15:33612	170303_WF3_1.raw	3	3	sp|P02671|FIBA_HUMAN	Oxidation (M)	M1:Oxidation (M):1000.00
SVLGQLGITKVF	65.78	1260.74	12	1.9	631.381	103.78	56300000	9	F9:50488	WF5_80uL_long_1.raw	22	22	sp|P01009|A1AT_HUMAN
AINVAVHVF	65.74	968.544	9	0.4	485.28	61.46	1350000	17	F17:24977	170303_WF4_1.raw	4	4	sp|P02766|TTHY_HUMAN
LGLPGPPDVPDHA	65.72	1283.65	13	2.6	642.835	62.46	90100000	5	F5:26212	WF3_80uL_long_1.raw	19	19	sp|Q14624|ITIH4_HUMAN
LLKLGNQEPGGQTA	65.71	1424.76	14	2	713.39	24.26	29700000	6	F6:10047	WF3_80uL_long_2.raw	16	16	sp|P08697|A2AP_HUMAN
VLGAFSDGLAHLDNLKGTFA	65.69	2045.06	20	3.2	1023.54	103.85	6830000	12	F12:54773	170303_WF1_3.raw	9	9	sp|P68871|HBB_HUMAN
DFLAEGGGVR	65.68	1019.5	10	1.5	510.76	34.68	67300000	8	F8:15299	WF4_80uL_long_2.raw	17	17	sp|P02671|FIBA_HUMAN
VLPEGGETPLF	65.66	1157.6	11	1.1	579.806	94.82	7240000	5	F5:39587	WF3_80uL_long_1.raw	14	14	sp|P06396|GELS_HUMAN
VLPEGGETPIF	65.66	1157.6	11	1.1	579.806	94.82	7240000	5	F5:39587	WF3_80uL_long_1.raw	14	14
AINDPFIDLNYM(+15.99)V	65.65	1539.73	13	1.9	770.873	112.72	36900000	1	F1:56819	WF1_80uL_long_1.raw	20	20	sp|P04406|G3P_HUMAN	Oxidation (M)	M12:Oxidation (M):1000.00
ALAIVEALN(+.98)GKEVAA	65.65	1468.81	15	3.5	735.417	79.57	176000	10	F10:41089	WF5_80uL_long_2.raw	1	1	sp|Q99497|PARK7_HUMAN	Deamidation (NQ)	N9:Deamidation (NQ):1000.00
DDQVFPM(+15.99)NPPKYD	65.65	1580.68	13	-0.5	791.348	49.75	1590000	5	F5:20657	WF3_80uL_long_1.raw	13	13	sp|P12882|MYH1_HUMAN	Oxidation (M)	M7:Oxidation (M):1000.00
SPFTIEM(+15.99)SAFGYVFPKAV	65.61	2005.99	18	2.1	1004	111.46	10200000	2	F2:58116	WF1_80uL_long_2.raw	19	19	sp|P04114|APOB_HUMAN	Oxidation (M)	M7:Oxidation (M):1000.00
NELEGLGDIFHPM(+15.99)	65.6	1486.68	13	-2.1	744.344	101.73	232000	10	F10:54363	WF5_80uL_long_2.raw	4	4	sp|Q96Q06|PLIN4_HUMAN	Oxidation (M)	M13:Oxidation (M):1000.00
YFVELGTQPAT	65.6	1224.6	11	1.2	613.309	74.32	5500000	9	F9:35381	WF5_80uL_long_1.raw	10	10	sp|P02652|APOA2_HUMAN
SLAELGGHLDQQ(+.98)V	65.56	1366.67	13	0.8	684.344	63.47	5330000	20	F20:29181	170303_WF5_2.raw	15	15	sp|P06727|APOA4_HUMAN	Deamidation (NQ)	Q12:Deamidation (NQ):26.02
SGEGDFLAEGGGVR	65.56	1349.62	14	0.5	675.818	39.32	16800000	16	F16:15337	170303_WF3_2.raw	22	22	sp|P02671|FIBA_HUMAN
LESFKVSFLSA	65.55	1226.65	11	3.5	614.337	93.34	546000	4	F4:50607	WF2_80uL_long_2.raw	6	6	sp|P02647|APOA1_HUMAN
LFQDKLGEVNTY	65.54	1425.71	12	1.4	713.865	59.85	1070000	9	F9:28298	WF5_80uL_long_1.raw	10	10	sp|P06727|APOA4_HUMAN
ILNTFHIPSFTI	65.52	1401.77	12	1.2	701.891	108.35	117000000	14	F14:54832	170303_WF2_2.raw	17	17	sp|P04114|APOB_HUMAN
IQLTYNPDESSKPNM(+15.99)I	65.51	1864.89	16	-2.6	933.449	52.53	473000	15	F15:20062	170303_WF3_1.raw	10	10	sp|P02679|FIBG_HUMAN	Oxidation (M)	M15:Oxidation (M):1000.00
EFVSETESRGSESGIFT	65.51	1860.84	17	0.8	931.427	58.43	5320000	16	F16:22222	170303_WF3_2.raw	16	16	sp|P02671|FIBA_HUMAN
FNKPFVFLM(+15.99)	65.51	1157.59	9	2.5	579.806	85.03	5180000	9	F9:41168	WF5_80uL_long_1.raw	8	8	sp|P01009|A1AT_HUMAN	Oxidation (M)	M9:Oxidation (M):1000.00
MNSFVNDIFERI	65.5	1483.71	12	3.8	742.866	110.01	11100000	3	F3:75997	WF2_80uL_long_1.raw	4	4
IISAPSADAPM(+15.99)FV	65.48	1333.66	13	4.5	667.84	84.54	1010000	3	F3:56170	WF2_80uL_long_1.raw	4	4	sp|P04406|G3P_HUMAN	Oxidation (M)	M11:Oxidation (M):1000.00
TLSGIGTLDGF	65.46	1079.55	11	0.4	540.782	104.4	16100000	18	F18:40856	170303_WF4_2.raw	27	25	sp|P02671|FIBA_HUMAN
DSLQASLRPHADEL	65.4	1550.77	14	3.8	776.395	42.39	42900000	8	F8:18610	WF4_80uL_long_2.raw	9	9	sp|P06727|APOA4_HUMAN
TPDVSSALDKL	65.39	1144.6	11	2.5	573.308	64.79	9950000	9	F9:30849	WF5_80uL_long_1.raw	14	14	sp|P02654|APOC1_HUMAN
STGKTFPGFFSPM(+15.99)LG	65.39	1588.76	15	1.8	795.389	92.33	12900000	6	F6:39203	WF3_80uL_long_2.raw	13	13	sp|P02671|FIBA_HUMAN	Oxidation (M)	M13:Oxidation (M):1000.00
NYIGSDKYF	65.37	1105.51	9	0.6	553.762	48.13	6800000	15	F15:18540	170303_WF3_1.raw	15	15	sp|P0DJI8|SAA1_HUMAN:sp|P0DJI9|SAA2_HUMAN
ILLTDGDPTVGETNPR	65.36	1696.86	16	0.6	849.439	46.46	298000	11	F11:27426	170303_WF1_2.raw	4	4	sp|Q14624|ITIH4_HUMAN
GIM(+15.99)NSFVNDIFERI	65.35	1669.81	14	-3.2	835.911	110.61	1540000	11	F11:74389	170303_WF1_2.raw	13	13		Oxidation (M)	M3:Oxidation (M):1000.00
KIEFTPEQIEEF	65.34	1508.74	12	-1.9	755.376	93.62	2800000	16	F16:34970	170303_WF3_2.raw	12	12	sp|P08590|MYL3_HUMAN
LEGFLSELEPEPR	65.3	1514.76	13	2.4	758.39	95.83	1430000	20	F20:47024	170303_WF5_2.raw	7	7	sp|Q8IUX7|AEBP1_HUMAN
LDDDLEHQGGHV	65.28	1333.59	12	3.3	667.804	15.6	566000000	10	F10:5821	WF5_80uL_long_2.raw	30	30	sp|P01042|KNG1_HUMAN
KLGPHAGDVEGHLS	65.23	1415.72	14	0	708.865	12.06	44200000	11	F11:3643	170303_WF1_2.raw	20	20	sp|P06727|APOA4_HUMAN
LLVVYPWTQRF	65.22	1420.79	11	3.5	711.403	105.24	29500000	9	F9:51676	WF5_80uL_long_1.raw	20	20	sp|P68871|HBB_HUMAN:sp|P02042|HBD_HUMAN:sp|P69891|HBG1_HUMAN:sp|P69892|HBG2_HUMAN
SGEQVERVNEPSILEM(+15.99)S	65.15	1918.89	17	1.6	960.456	48.59	1290000	7	F7:22745	WF4_80uL_long_1.raw	5	5	sp|O14791|APOL1_HUMAN	Oxidation (M)	M16:Oxidation (M):1000.00
TGIFTDQVLSVLKGEE	65.15	1734.9	16	3.5	868.462	110.35	112000000	2	F2:57404	WF1_80uL_long_2.raw	35	35	sp|P02655|APOC2_HUMAN
SLFSLGM(+15.99)GFDVDYDFL	65.13	1840.82	16	4.8	921.423	117.79	187000	1	F1:60983	WF1_80uL_long_1.raw	3	3	sp|P19823|ITIH2_HUMAN	Oxidation (M)	M7:Oxidation (M):1000.00
YFVELGTQPATQ	65.11	1352.66	12	3.4	677.34	72.69	1430000	10	F10:36585	WF5_80uL_long_2.raw	8	8	sp|P02652|APOA2_HUMAN
TGKIVEEEAQEDLEGL	65.1	1758.85	16	1.3	880.435	73.51	567000	19	F19:34077	170303_WF5_1.raw	4	4	sp|Q0VD83|APOBR_HUMAN
ALTNAVAHVD	65.01	1009.52	10	0.4	505.767	17.28	8120000	14	F14:7060	170303_WF2_2.raw	10	10	sp|P69905|HBA_HUMAN
LGEFVSETESR	65	1252.59	11	3.4	627.306	27.32	8330000	5	F5:10829	WF3_80uL_long_1.raw	18	18	sp|P02671|FIBA_HUMAN
M(+15.99)NSFVN(+.98)DIFERI	65	1500.69	12	-1.2	751.352	110.43	3280000	19	F19:57228	170303_WF5_1.raw	11	11		Oxidation (M); Deamidation (NQ)	M1:Oxidation (M):1000.00;N6:Deamidation (NQ):109.97
LESFKVSFL	64.96	1068.59	9	1.2	535.301	93.26	32900000	11	F11:60444	170303_WF1_2.raw	10	10	sp|P02647|APOA1_HUMAN
PGSSGTGGTATWKPGSSGP	64.96	1687.78	19	3.5	844.9	18.83	2020000	15	F15:7210	170303_WF3_1.raw	6	6	sp|P02671|FIBA_HUMAN
DEKGTEAAGAM(+15.99)F	64.9	1241.52	12	2.9	621.771	19.95	8740000	5	F5:7107	WF3_80uL_long_1.raw	13	13	sp|P01009|A1AT_HUMAN	Oxidation (M)	M11:Oxidation (M):1000.00
AVLDVFEEGTEASAATAVKI	64.88	2020.04	20	3.4	1011.03	106.83	6880000	19	F19:54358	170303_WF5_1.raw	13	13	sp|P01011|AACT_HUMAN
GVVSLGSPSGEVSHP	64.86	1407.7	15	2.2	704.859	34.4	5590000	8	F8:14964	WF4_80uL_long_2.raw	3	3	sp|P02765|FETUA_HUMAN
FPHFDLSHGSAQV	64.86	1440.68	13	2.2	721.348	59.68	54700000	10	F10:29587	WF5_80uL_long_2.raw	17	17	sp|P69905|HBA_HUMAN
LTIDEKGTEAAGA	64.83	1274.64	13	-2.8	638.323	19.37	4270000	5	F5:6789	WF3_80uL_long_1.raw	12	12	sp|P01009|A1AT_HUMAN
YLAAVLEYLTA	64.82	1225.66	11	1.9	613.838	117.56	1460000	1	F1:60751	WF1_80uL_long_1.raw	9	9
YLAAVIEYLTA	64.82	1225.66	11	1.9	613.838	117.56	1460000	1	F1:60751	WF1_80uL_long_1.raw	9	9
GIFTDQVLSVLKGEE	64.82	1633.86	15	3.6	817.938	109.95	503000000	10	F10:61354	WF5_80uL_long_2.raw	32	32	sp|P02655|APOC2_HUMAN
TENDIQIALDDAKI	64.79	1557.79	14	1.9	779.903	100.94	49500	13	F13:60788	170303_WF2_1.raw	3	3	sp|P04114|APOB_HUMAN
TIEM(+15.99)SAFGYVFPK	64.78	1504.73	13	1.8	753.372	91.12	455000	5	F5:38250	WF3_80uL_long_1.raw	9	9	sp|P04114|APOB_HUMAN	Oxidation (M)	M4:Oxidation (M):1000.00
YPWTQRFFESF	64.78	1506.69	11	3.1	754.356	107.79	19100000	9	F9:54022	WF5_80uL_long_1.raw	10	10	sp|P68871|HBB_HUMAN:sp|P02042|HBD_HUMAN
TLTDFRAFQTV	64.77	1297.67	11	2.2	649.842	81.38	11600000	7	F7:39320	WF4_80uL_long_1.raw	14	14	sp|P49747|COMP_HUMAN
LAELGGHLDQQV	64.76	1278.66	12	1.5	640.337	41.63	1970000	4	F4:20139	WF2_80uL_long_2.raw	9	9	sp|P06727|APOA4_HUMAN
LDDDLEHQGGHVLD	64.74	1561.7	14	3	781.86	30.24	43800000	9	F9:14421	WF5_80uL_long_1.raw	21	21	sp|P01042|KNG1_HUMAN
LLEPGM(+15.99)ELGITA	64.74	1258.65	12	2.2	630.333	94.81	13400000	1	F1:43804	WF1_80uL_long_1.raw	15	15	sp|O14791|APOL1_HUMAN	Oxidation (M)	M6:Oxidation (M):1000.00
LGAFSDGLAHLD	64.73	1214.59	12	0.2	608.304	73.96	394000	5	F5:30837	WF3_80uL_long_1.raw	8	8	sp|P68871|HBB_HUMAN:sp|P02042|HBD_HUMAN
IVERPLPGYPDAEAPEPS	64.71	1935.96	18	2.1	968.988	54.14	14600000	14	F14:25101	170303_WF2_2.raw	15	15	sp|Q6NZI2|CAVN1_HUMAN
SDQVPDTESETRILL	64.7	1701.84	15	2.6	851.931	70.97	4160000	17	F17:28473	170303_WF4_1.raw	5	5	sp|P01024|CO3_HUMAN
TQVKESLSSYWESA	64.68	1613.76	14	2.4	807.888	63.64	348000	7	F7:30434	WF4_80uL_long_1.raw	3	3	sp|P02655|APOC2_HUMAN
ALSTGEKGFGY	64.64	1128.55	11	1.9	565.281	28.36	499000	6	F6:11768	WF3_80uL_long_2.raw	8	8	sp|P62937|PPIA_HUMAN
SLKDNVPKATGV	64.64	1227.68	12	1.5	614.849	15.76	136000000	13	F13:6651	170303_WF2_1.raw	24	24	sp|P04114|APOB_HUMAN
LKPEEEAPAPEVGASKPEGI	64.62	2047.05	20	1.9	683.358	30.81	73600000	15	F15:12239	170303_WF3_1.raw	16	16	sp|P04004|VTNC_HUMAN
PGVLSSRQLGLPGPPDVPDHA	64.6	2108.1	21	2.8	703.71	72.9	62400000	8	F8:32954	WF4_80uL_long_2.raw	13	13	sp|Q14624|ITIH4_HUMAN
AAWGKVGAHAGEYGAEALER	64.6	2042	20	1.7	681.674	36.78	8350000	15	F15:14401	170303_WF3_1.raw	10	10	sp|P69905|HBA_HUMAN
SNGADLSGVTEEAPLKL	64.59	1699.86	17	-1.2	850.938	80.77	70500	7	F7:38910	WF4_80uL_long_1.raw	2	2	sp|P01009|A1AT_HUMAN
VIPELNGKLTGM(+15.99)AF	64.58	1504.8	14	-0.2	753.405	79.44	2370000	7	F7:38101	WF4_80uL_long_1.raw	10	10	sp|P04406|G3P_HUMAN	Oxidation (M)	M12:Oxidation (M):1000.00
TDFVNWASSINDAPVLI	64.58	1860.93	17	2.1	931.472	117.57	836000	2	F2:63159	WF1_80uL_long_2.raw	2	2	sp|P02748|CO9_HUMAN
PGVLSSRQLGLPGPPDVPDHAAYHPF	64.58	2723.38	26	2.4	908.803	85.23	47900000	18	F18:33391	170303_WF4_2.raw	10	10	sp|Q14624|ITIH4_HUMAN
SLDKFLASVSTVLT	64.56	1479.82	14	2	740.918	111.11	18500000	4	F4:63543	WF2_80uL_long_2.raw	13	13	sp|P69905|HBA_HUMAN
YLAAVLEYLTAEIL	64.54	1580.87	14	-0.6	791.442	118.11	232000	1	F1:61267	WF1_80uL_long_1.raw	4	4
DLDPGAGSLEI	64.53	1085.52	11	2.3	543.771	95.94	135000000	5	F5:40194	WF3_80uL_long_1.raw	20	20	sp|Q13790|APOF_HUMAN
VLGAFSDGLAHLDN(+.98)L	64.53	1541.77	15	3.7	771.896	107.39	115000	19	F19:54800	170303_WF5_1.raw	4	4	sp|P68871|HBB_HUMAN:sp|P02042|HBD_HUMAN	Deamidation (NQ)	N14:Deamidation (NQ):1000.00
TAEGKGQGTLSVV	64.51	1245.66	13	2	623.837	18.46	13400000	4	F4:7005	WF2_80uL_long_2.raw	7	7	sp|P01024|CO3_HUMAN
GVNLQEFLNVTSV	64.49	1418.74	13	3.1	710.38	113.56	12600000	13	F13:70977	170303_WF2_1.raw	20	20	sp|P00488|F13A_HUMAN
SLLSFM(+15.99)QGYM(+15.99)KHAT	64.47	1644.76	14	1.2	823.39	33.06	2360000	11	F11:19345	170303_WF1_2.raw	2	2	sp|P02656|APOC3_HUMAN	Oxidation (M)	M6:Oxidation (M):1000.00;M10:Oxidation (M):1000.00
LSDQVPDTESETR	64.43	1475.67	13	1.6	738.846	17.03	39600000	8	F8:6368	WF4_80uL_long_2.raw	18	18	sp|P01024|CO3_HUMAN
FLSYFVELGTQPAT	64.43	1571.79	14	-0.4	786.9	110.89	1240000	7	F7:55329	WF4_80uL_long_1.raw	10	10	sp|P02652|APOA2_HUMAN
ESSSHHPGIAEFPSRG	64.42	1693.78	16	2.7	847.9	13.04	145000000	7	F7:3820	WF4_80uL_long_1.raw	24	24	sp|P02671|FIBA_HUMAN
LESFKVSFLSALEEYTK	64.42	1990.03	17	-0.4	664.35	110.14	2930000	1	F1:54658	WF1_80uL_long_1.raw	12	12	sp|P02647|APOA1_HUMAN
NWRDPDQTDGLGLSY	64.42	1735.78	15	1.3	868.898	78.75	155000	6	F6:33195	WF3_80uL_long_2.raw	3	3	sp|P06396|GELS_HUMAN
VTDYGKDLM(+15.99)EKV	64.41	1412.69	12	2.8	707.352	25.38	1440000	10	F10:11824	WF5_80uL_long_2.raw	7	7	sp|P02652|APOA2_HUMAN	Oxidation (M)	M9:Oxidation (M):1000.00
GIVTNWDDM(+15.99)EKI	64.39	1435.67	12	2.1	718.841	61.34	4040000	10	F10:30270	WF5_80uL_long_2.raw	10	10	sp|P60709|ACTB_HUMAN:sp|P63261|ACTG_HUMAN	Oxidation (M)	M9:Oxidation (M):1000.00
VEGSDAEIGM(+15.99)SPWQVM(+15.99)LF	64.38	2026.9	18	-3	1014.46	114.99	2590000	15	F15:47145	170303_WF3_1.raw	9	9	sp|P00734|THRB_HUMAN	Oxidation (M)	M10:Oxidation (M):1000.00;M16:Oxidation (M):1000.00
LLKLGNQEPGGQTAL	64.34	1537.85	15	2.4	769.932	48.49	16500000	6	F6:20700	WF3_80uL_long_2.raw	15	15	sp|P08697|A2AP_HUMAN
GLGLSYLSSHI	64.3	1145.61	11	1.8	573.812	86.44	1990000	11	F11:55233	170303_WF1_2.raw	7	7	sp|P06396|GELS_HUMAN
FDFDPQEDGELGF	64.29	1514.62	13	2.2	758.319	112.74	91100	10	F10:63379	WF5_80uL_long_2.raw	2	2
SGPDIDIEGPEGKL	64.26	1425.7	14	2.5	713.858	64.44	35400	10	F10:32142	WF5_80uL_long_2.raw	2	2	sp|Q09666|AHNK_HUMAN
VFLM(+15.99)IEQNTKSPLF	64.24	1681.87	14	1.8	841.946	100.2	4650000	10	F10:53160	WF5_80uL_long_2.raw	9	9	sp|P01009|A1AT_HUMAN	Oxidation (M)	M4:Oxidation (M):1000.00
DLGGFDEDAEPR	64.22	1319.56	12	2.4	660.79	43.41	1610000	5	F5:17756	WF3_80uL_long_1.raw	11	11	sp|Q9BRK5|CAB45_HUMAN
SN(+.98)GADLSGVTEEAPLKL	64.2	1700.85	17	3.7	851.434	91.51	1530000	20	F20:44521	170303_WF5_2.raw	11	11	sp|P01009|A1AT_HUMAN	Deamidation (NQ)	N2:Deamidation (NQ):1000.00
LLTEAPLNPKA	64.2	1165.67	11	1.8	583.844	33.02	7120000	4	F4:15761	WF2_80uL_long_2.raw	13	13	sp|P60709|ACTB_HUMAN:sp|P63261|ACTG_HUMAN:sp|P68032|ACTC_HUMAN:sp|P68133|ACTS_HUMAN
GEYGAEALERM(+15.99)	64.19	1240.54	11	2	621.278	22.75	110000000	11	F11:11988	170303_WF1_2.raw	18	18	sp|P69905|HBA_HUMAN	Oxidation (M)	M11:Oxidation (M):1000.00
TGVDNPGHPF	64.17	1039.47	10	2.2	520.745	19.9	6820000	9	F9:8811	WF5_80uL_long_1.raw	7	7	sp|P06732|KCRM_HUMAN
KLGPHAGDVEGHLSF	64.03	1562.78	15	1	521.936	27.6	79900000	14	F14:13042	170303_WF2_2.raw	17	17	sp|P06727|APOA4_HUMAN
DVRVLLDQLGTTI	64	1441.81	13	2.4	721.916	113.39	51400000	1	F1:57349	WF1_80uL_long_1.raw	25	25	sp|P04114|APOB_HUMAN
NDLNSVLVM(+15.99)PTFHVPF	63.99	1844.91	16	1.2	923.465	109.69	5810000	3	F3:75744	WF2_80uL_long_1.raw	17	17	sp|P04114|APOB_HUMAN	Oxidation (M)	M9:Oxidation (M):1000.00
AGEYGAEALERM(+15.99)FL	63.99	1571.73	14	2.2	786.873	102.81	4590000	1	F1:48798	WF1_80uL_long_1.raw	17	17	sp|P69905|HBA_HUMAN	Oxidation (M)	M12:Oxidation (M):1000.00
LLVVYPWTQR	63.99	1273.72	10	2	637.868	87.42	2780000	6	F6:37269	WF3_80uL_long_2.raw	11	11	sp|P68871|HBB_HUMAN:sp|P02042|HBD_HUMAN:sp|P69891|HBG1_HUMAN:sp|P69892|HBG2_HUMAN
GLKDQEDSDGHLSV	63.97	1498.69	14	1.4	750.353	17.33	54500000	11	F11:7682	170303_WF1_2.raw	24	24	sp|Q14515|SPRL1_HUMAN
GSTGQWHSESGSFRPDSPGSGNA	63.96	2303.98	23	0.3	1153	21.04	2410000	13	F13:10223	170303_WF2_1.raw	6	6	sp|P02671|FIBA_HUMAN
NHQLEGLTFQM(+15.99)K	63.95	1460.71	12	2.7	731.363	22.41	59000000	15	F15:8977	170303_WF3_1.raw	18	18	sp|P06727|APOA4_HUMAN	Oxidation (M)	M11:Oxidation (M):1000.00
M(+15.99)ELERPGGNEIT	63.94	1360.63	12	0	681.322	18.1	49500000	16	F16:6959	170303_WF3_2.raw	19	19	sp|P02671|FIBA_HUMAN	Oxidation (M)	M1:Oxidation (M):1000.00
GTNIGEALGHGLGDAL	63.92	1493.75	16	1.5	747.882	85.88	339000	7	F7:41688	WF4_80uL_long_1.raw	4	4	sp|Q6E0U4|DMKN_HUMAN
VNVDEVGGEALGRLLV	63.87	1638.89	16	0.3	820.455	105.64	24700000	12	F12:56225	170303_WF1_3.raw	17	17	sp|P68871|HBB_HUMAN
LLPVLESFKVSF	63.85	1377.79	12	1.3	689.904	112.33	471000	3	F3:78035	WF2_80uL_long_1.raw	5	5	sp|P02647|APOA1_HUMAN
GLPGPPDVPDHA	63.85	1170.57	12	0.8	586.291	40.37	1700000000	15	F15:15982	170303_WF3_1.raw	15	15	sp|Q14624|ITIH4_HUMAN
GALQEASEAYLV	63.84	1249.62	12	3.7	625.819	87.4	420000	9	F9:42233	WF5_80uL_long_1.raw	6	6	sp|P84243|H33_HUMAN
LPEGGETPLFKQFF	63.82	1608.82	14	2.3	805.418	106.57	3120000	7	F7:52354	WF4_80uL_long_1.raw	15	15	sp|P06396|GELS_HUMAN
LPEGGETPIFKQFF	63.82	1608.82	14	2.3	805.418	106.57	3120000	7	F7:52354	WF4_80uL_long_1.raw	15	15
KPRLLLFSPSVV	63.79	1354.83	12	0.9	678.425	72.5	153000000	13	F13:41949	170303_WF2_1.raw	16	16
DVVM(+15.99)TQSPLSLPVTLGQPA	63.79	1968.02	19	0.2	985.019	110.81	9170000	11	F11:74639	170303_WF1_2.raw	21	21	sp|A0A075B6S6|KVD30_HUMAN:sp|P06310|KV230_HUMAN	Oxidation (M)	M4:Oxidation (M):1000.00
IDEKGTEAAGAM(+15.99)F	63.78	1354.61	13	1.5	678.312	25.16	1670000	16	F16:10003	170303_WF3_2.raw	9	9	sp|P01009|A1AT_HUMAN	Oxidation (M)	M12:Oxidation (M):1000.00
M(+15.99)DIDAPDVEVQGPDWHL	63.71	1951.86	17	1.4	976.94	102.55	276000	3	F3:69333	WF2_80uL_long_1.raw	4	4	sp|Q09666|AHNK_HUMAN	Oxidation (M)	M1:Oxidation (M):1000.00
LDDFQKKWQEEM(+15.99)ELY	63.63	2016.91	15	-0.3	1009.46	78.52	134000000	11	F11:49760	170303_WF1_2.raw	14	14	sp|P02647|APOA1_HUMAN	Oxidation (M)	M12:Oxidation (M):1000.00
GEYGAEALERM(+15.99)F	63.62	1387.61	12	2.3	694.813	70.46	3900000	1	F1:29829	WF1_80uL_long_1.raw	16	16	sp|P69905|HBA_HUMAN	Oxidation (M)	M11:Oxidation (M):1000.00
FFGHGAEDSLADQ	63.62	1392.59	13	4.1	697.307	39.45	1230000	9	F9:18853	WF5_80uL_long_1.raw	7	7	sp|P0DJI8|SAA1_HUMAN
DSPGSGN(+.98)ARPNNPDWGTF	63.6	1888.8	18	3	945.409	70.71	7070000	4	F4:37048	WF2_80uL_long_2.raw	5	5	sp|P02671|FIBA_HUMAN	Deamidation (NQ)	N7:Deamidation (NQ):43.86
TVTAM(+15.99)DVVYALK	63.58	1325.69	12	2.4	663.854	68.21	309000	6	F6:28974	WF3_80uL_long_2.raw	6	6	sp|P62805|H4_HUMAN	Oxidation (M)	M5:Oxidation (M):1000.00
TFEYPSNAVEEV	63.57	1383.62	12	3.2	692.819	81.63	2040000	1	F1:36187	WF1_80uL_long_1.raw	7	7	sp|Q14624|ITIH4_HUMAN
VGFYESDVM(+15.99)GR	63.57	1274.56	11	1.6	638.288	28.57	1410000	9	F9:13711	WF5_80uL_long_1.raw	14	14	sp|P01023|A2MG_HUMAN	Oxidation (M)	M9:Oxidation (M):1000.00
VDWILEKTQAV	63.55	1300.7	11	2	651.36	75.28	65700000	6	F6:31878	WF3_80uL_long_2.raw	18	18	sp|P03951|FA11_HUMAN
KIVLDPSGSM(+15.99)NI	63.54	1288.67	12	3	645.344	38.89	116000000	9	F9:18824	WF5_80uL_long_1.raw	17	17	sp|P00751|CFAB_HUMAN	Oxidation (M)	M10:Oxidation (M):1000.00
HLPAEFTPAVHA	63.54	1288.66	12	1.8	645.337	32.81	120000000	12	F12:15766	170303_WF1_3.raw	25	25	sp|P69905|HBA_HUMAN
FFGHGAEDSLADQA	63.52	1463.63	14	2.7	732.825	47.06	28300000	16	F16:18122	170303_WF3_2.raw	17	17	sp|P0DJI8|SAA1_HUMAN
YQKVVAGVANALA	63.49	1302.73	13	3.6	652.374	41.87	3630000	12	F12:19973	170303_WF1_3.raw	7	7	sp|P68871|HBB_HUMAN:sp|P02042|HBD_HUMAN
NIGEALGHGLGDAL	63.46	1335.68	14	3.1	668.848	79.39	782000	5	F5:33045	WF3_80uL_long_1.raw	5	5	sp|Q6E0U4|DMKN_HUMAN
SEKAKPALEDL	63.44	1199.64	11	1.3	600.828	15.79	286000000	19	F19:5941	170303_WF5_1.raw	19	19	sp|P02647|APOA1_HUMAN
AELEELEQEELDKN	63.42	1687.78	14	3.4	844.899	63	83100	9	F9:29837	WF5_80uL_long_1.raw	6	6	sp|Q9H444|CHM4B_HUMAN
SEDAGGAEGETPHM(+15.99)LL	63.38	1628.7	16	1.5	815.358	33.69	2240000	15	F15:13235	170303_WF3_1.raw	15	15	sp|Q92954|PRG4_HUMAN	Oxidation (M)	M14:Oxidation (M):1000.00
SIIDTPGILSGEKQ	63.37	1456.78	14	0	729.396	72.32	250000	1	F1:30741	WF1_80uL_long_1.raw	6	6
KVEQAVETEPEPEL	63.36	1596.79	14	2.7	799.404	34.2	135000000	19	F19:15981	170303_WF5_1.raw	19	19	sp|P02649|APOE_HUMAN
PDSPGSGN(+.98)ARPNNPDWGTF	63.36	1985.85	19	2.9	993.935	66.02	10700000	4	F4:34152	WF2_80uL_long_2.raw	14	14	sp|P02671|FIBA_HUMAN	Deamidation (NQ)	N8:Deamidation (NQ):46.21
ALNLPTLPEVKFPEVDV	63.35	1880.03	17	4.8	941.027	111.46	7760000	9	F9:56738	WF5_80uL_long_1.raw	16	16	sp|P04114|APOB_HUMAN
TVTAMDVVYALK	63.35	1309.7	12	1.4	655.856	100.23	469000	1	F1:46731	WF1_80uL_long_1.raw	4	4	sp|P62805|H4_HUMAN
SLLSFM(+15.99)QGY	63.34	1060.49	9	2.2	531.253	93.63	17400000	4	F4:51244	WF2_80uL_long_2.raw	19	19	sp|P02656|APOC3_HUMAN	Oxidation (M)	M6:Oxidation (M):1000.00
DEPPQSPWDRV	63.32	1324.6	11	3.2	663.312	53.33	306000000	10	F10:26921	WF5_80uL_long_2.raw	25	24	sp|P02647|APOA1_HUMAN
IVEGSDAEIGM(+15.99)SPWQVM(+15.99)LF	63.32	2139.99	19	-4.2	1071	115.18	7100000	5	F5:51345	WF3_80uL_long_1.raw	14	14	sp|P00734|THRB_HUMAN	Oxidation (M)	M11:Oxidation (M):1000.00;M17:Oxidation (M):1000.00
SSHHPGIAEFPSRG	63.31	1477.71	14	2.1	739.862	12.41	130000000	18	F18:3393	170303_WF4_2.raw	28	28	sp|P02671|FIBA_HUMAN
TGWRPGSGFTNTM(+15.99)	63.28	1426.63	13	4.6	714.326	37.6	2400000	4	F4:18021	WF2_80uL_long_2.raw	9	9	sp|P14618|KPYM_HUMAN	Oxidation (M)	M13:Oxidation (M):1000.00
SEFWDLDPEVRPT	63.27	1589.74	13	1.4	795.876	97.75	14700000	6	F6:41385	WF3_80uL_long_2.raw	19	19	sp|P02656|APOC3_HUMAN
YVFLTKGGYTLV	63.25	1359.74	12	1.7	680.88	87.78	209000	14	F14:42021	170303_WF2_2.raw	4	4	sp|P02790|HEMO_HUMAN
YLDDFQKKWQEEM(+15.99)ELY	63.23	2179.98	16	-1.2	1090.99	97.89	6720000	16	F16:36794	170303_WF3_2.raw	13	13	sp|P02647|APOA1_HUMAN	Oxidation (M)	M13:Oxidation (M):1000.00
FVTHPGYDTGN(+.98)GI	63.21	1377.62	13	3.3	689.82	38.12	18200000	10	F10:18264	WF5_80uL_long_2.raw	22	22	sp|P02751|FINC_HUMAN	Deamidation (NQ)	N11:Deamidation (NQ):1000.00
KLYKVSNGAGTM(+15.99)SV	63.21	1469.75	14	0	735.885	12.46	97800	11	F11:3980	170303_WF1_2.raw	1	1	sp|P06396|GELS_HUMAN	Oxidation (M)	M12:Oxidation (M):1000.00
TVVKQGFEPPSFV	63.18	1433.76	13	1.5	717.886	68.42	5030000	7	F7:33007	WF4_80uL_long_1.raw	13	13	sp|P06396|GELS_HUMAN
QGLLPVLESFKVSF	63.15	1562.87	14	-1.8	782.441	116.45	2880000	1	F1:59806	WF1_80uL_long_1.raw	15	15	sp|P02647|APOA1_HUMAN
AAWGKVGAHAGEY	63.14	1315.63	13	0.5	658.823	17.65	229000	9	F9:7339	WF5_80uL_long_1.raw	3	3	sp|P69905|HBA_HUMAN
HTFM(+15.99)GVVSLGSPSGEVSHPR	63.14	2096.01	20	3	699.68	27.51	6070000	8	F8:11925	WF4_80uL_long_2.raw	7	7	sp|P02765|FETUA_HUMAN	Oxidation (M)	M4:Oxidation (M):1000.00
RLLLPGELAKHAVSEGT	63.08	1790.01	17	2.6	597.677	44.63	18700000	10	F10:21696	WF5_80uL_long_2.raw	10	10
ARAEVSADQVATV	63.07	1315.67	13	1.8	658.845	21.21	12200000	3	F3:9891	WF2_80uL_long_1.raw	16	16	sp|P06727|APOA4_HUMAN
AWGKVGAHAGEY	63.05	1244.59	12	2	623.305	14.89	1220000	10	F10:5359	WF5_80uL_long_2.raw	5	5	sp|P69905|HBA_HUMAN
SNFGYDLYRV	63.05	1232.58	10	0.7	617.299	70.57	550000	10	F10:35319	WF5_80uL_long_2.raw	4	4	sp|P36955|PEDF_HUMAN
TWKPGSSGPGSTGSWNS	63.03	1691.75	17	2.9	846.887	34.75	0	3	F3:20088	WF2_80uL_long_1.raw	0	0	sp|P02671|FIBA_HUMAN
STGKTFPGFFSP	63.02	1271.62	12	0.5	636.817	83.43	64800000	1	F1:37489	WF1_80uL_long_1.raw	18	18	sp|P02671|FIBA_HUMAN
AAVPSGASTGIYEALEL	62.99	1647.84	17	4.1	824.928	110.17	32400000	1	F1:54837	WF1_80uL_long_1.raw	22	22	sp|P06733|ENOA_HUMAN:sp|P13929|ENOB_HUMAN
DTASTGKTFPGFFSPM(+15.99)LGEFV	62.98	2251.05	21	2.3	1126.54	113.64	315000000	16	F16:46285	170303_WF3_2.raw	33	33	sp|P02671|FIBA_HUMAN	Oxidation (M)	M16:Oxidation (M):1000.00
SVKWLPSSSPV	62.94	1185.64	11	0.9	593.827	57.04	5890000	4	F4:28427	WF2_80uL_long_2.raw	5	5	sp|P02751|FINC_HUMAN
VADALTNAVAH	62.94	1080.56	11	3.1	541.287	24.25	687000	10	F10:11139	WF5_80uL_long_2.raw	4	4	sp|P69905|HBA_HUMAN
EPLDDYVNTQGASLFSV	62.91	1853.87	17	-0.7	927.941	112.99	4490000	16	F16:45741	170303_WF3_2.raw	18	18	sp|P00747|PLMN_HUMAN
N(+.98)RNVHSGSTFF	62.9	1265.58	11	0.5	633.797	27.8	49100000	12	F12:13102	170303_WF1_3.raw	18	18	sp|Q14624|ITIH4_HUMAN	Deamidation (NQ)	N1:Deamidation (NQ):26.31
M(+15.99)WDYFSQLSNNAKEAV	62.89	1917.86	16	2.2	959.938	102.94	781000	1	F1:48710	WF1_80uL_long_1.raw	5	5	sp|P06727|APOA4_HUMAN	Oxidation (M)	M1:Oxidation (M):1000.00
VSVLPEGGETPLFKQFF	62.88	1893.99	17	-4.8	947.996	111.05	4840000	3	F3:76936	WF2_80uL_long_1.raw	12	12	sp|P06396|GELS_HUMAN
TAKDALSSVQESQVAQQA	62.87	1859.92	18	0.2	930.969	33.54	71700	11	F11:19037	170303_WF1_2.raw	4	4	sp|P02656|APOC3_HUMAN
LTETIEGVDAEDGHGPGEQQ	62.86	2080.92	20	1.8	1041.47	38.61	1080000	18	F18:16015	170303_WF4_2.raw	4	4	sp|P00751|CFAB_HUMAN
LTIDEKGTEAAGAM(+15.99)	62.86	1421.67	14	3.4	711.845	18.89	23100	10	F10:8076	WF5_80uL_long_2.raw	1	1	sp|P01009|A1AT_HUMAN	Oxidation (M)	M14:Oxidation (M):1000.00
EDSLADQAANKW	62.83	1346.61	12	3.1	674.314	45.03	16500	6	F6:18998	WF3_80uL_long_2.raw	2	2	sp|P0DJI9|SAA2_HUMAN
IPELNGKLTGM(+15.99)AF	62.82	1405.73	13	4.2	703.874	70.99	614000	8	F8:31811	WF4_80uL_long_2.raw	7	7	sp|P04406|G3P_HUMAN	Oxidation (M)	M11:Oxidation (M):1000.00
RVIISAPSADAPM(+15.99)FV	62.82	1588.83	15	1.6	795.423	72.16	169000	10	F10:36238	WF5_80uL_long_2.raw	6	6	sp|P04406|G3P_HUMAN	Oxidation (M)	M13:Oxidation (M):1000.00
GLEEELQFSLGSK	62.81	1435.72	13	-0.8	718.866	91.44	1560000	4	F4:49581	WF2_80uL_long_2.raw	7	7
ALADADADLEERL	62.8	1400.68	13	0.2	701.346	66.36	344000	10	F10:33107	WF5_80uL_long_2.raw	5	5	sp|O43633|CHM2A_HUMAN
IEQNTKSPLFM(+15.99)G	62.8	1379.68	12	1.1	690.846	26.31	2180000	9	F9:12559	WF5_80uL_long_1.raw	4	4	sp|P01009|A1AT_HUMAN	Oxidation (M)	M11:Oxidation (M):1000.00
ELERPGGNEIT	62.78	1213.59	11	1.5	607.805	17.01	737000000	16	F16:6495	170303_WF3_2.raw	13	13	sp|P02671|FIBA_HUMAN
ILAKGAEEM(+15.99)ETV	62.76	1305.65	12	1.3	653.832	15.41	189000	6	F6:4972	WF3_80uL_long_2.raw	1	1	sp|Q99497|PARK7_HUMAN	Oxidation (M)	M9:Oxidation (M):1000.00
VRELENELEAEQ	62.74	1457.7	12	2.1	729.859	32.11	13800000	15	F15:12604	170303_WF3_1.raw	14	14	sp|P12883|MYH7_HUMAN
YFEKSKEQLTPLI	62.72	1594.86	13	2.7	798.44	53.51	16200000	19	F19:24398	170303_WF5_1.raw	11	11	sp|P02652|APOA2_HUMAN
VSQYFQTVTDYGKDLM(+15.99)EKV	62.7	2266.08	19	0.6	1134.05	96.89	7280000	19	F19:47219	170303_WF5_1.raw	4	4	sp|P02652|APOA2_HUMAN	Oxidation (M)	M16:Oxidation (M):1000.00
NLGAPDINIEGL	62.7	1224.63	12	2.6	613.326	106.06	1460000	4	F4:59659	WF2_80uL_long_2.raw	11	11	sp|Q09666|AHNK_HUMAN
AYVVKVFSLAV	62.69	1194.7	11	0	598.358	104.49	314000	1	F1:49909	WF1_80uL_long_1.raw	4	4	sp|P01024|CO3_HUMAN
ANKIADFELPTIIVPEQTI	62.69	2111.15	19	-0.5	1056.58	110.51	1540000	12	F12:60138	170303_WF1_3.raw	4	4	sp|P04114|APOB_HUMAN
TYFPHFDLS	62.64	1125.51	9	1.6	563.765	87.01	39600000	9	F9:42971	WF5_80uL_long_1.raw	9	9	sp|P69905|HBA_HUMAN
SFLSALEEYT	62.63	1158.54	10	0.5	580.28	115.01	151000000	13	F13:72311	170303_WF2_1.raw	27	27	sp|P02647|APOA1_HUMAN
GSKGPLDQLEKGGETAQ	62.63	1713.85	17	1.8	857.936	24.56	28900000	8	F8:10747	WF4_80uL_long_2.raw	11	11	sp|P05546|HEP2_HUMAN
EVSPNPEPPEKPV	62.62	1417.71	13	2.5	709.864	19.05	2210000	3	F3:8212	WF2_80uL_long_1.raw	6	6	sp|Q9UBW5|BIN2_HUMAN
FLM(+15.99)IEQNTKSPLF	62.61	1582.81	13	3.2	792.413	89.62	233000	9	F9:43271	WF5_80uL_long_1.raw	5	5	sp|P01009|A1AT_HUMAN	Oxidation (M)	M3:Oxidation (M):1000.00
EYVDWILEKTQAV	62.57	1592.81	13	2.4	797.413	104.66	22500000	16	F16:40266	170303_WF3_2.raw	27	27	sp|P03951|FA11_HUMAN
HRHPDEAAFFDTA	62.57	1512.67	13	1.5	757.346	23.15	877000	16	F16:9335	170303_WF3_2.raw	2	2	sp|P02671|FIBA_HUMAN
FM(+15.99)GVVSLGSPSGEVSHP	62.54	1701.8	17	-1.8	851.907	58.71	18000	7	F7:27778	WF4_80uL_long_1.raw	1	1	sp|P02765|FETUA_HUMAN	Oxidation (M)	M2:Oxidation (M):1000.00
VLTIDEKGTE	62.52	1103.57	10	1.1	552.793	18.15	8230000	9	F9:7654	WF5_80uL_long_1.raw	15	15	sp|P01009|A1AT_HUMAN
AIQLTQSPSSLSASVGDRV	62.51	1915	19	2.5	958.51	72.22	149000	2	F2:32565	WF1_80uL_long_2.raw	4	4
EFTPAVHASLDKF	62.5	1460.73	13	1.7	731.374	51.79	17000000	11	F11:31175	170303_WF1_2.raw	8	8	sp|P69905|HBA_HUMAN
GILGYTEHQVV	62.49	1214.63	11	2.5	608.323	53.79	52000000	14	F14:24959	170303_WF2_2.raw	11	11	sp|P04406|G3P_HUMAN
SLTTNIM(+15.99)EILRGDFSSANN	62.48	2098	19	-1.7	1050.01	111.32	1190000	15	F15:45043	170303_WF3_1.raw	5	5	sp|P02671|FIBA_HUMAN	Oxidation (M)	M7:Oxidation (M):1000.00
YFQTVTDYGKDLM(+15.99)EKV	62.46	1951.92	16	-1.1	976.968	73.78	49900	15	F15:27792	170303_WF3_1.raw	3	3	sp|P02652|APOA2_HUMAN	Oxidation (M)	M13:Oxidation (M):1000.00
PMFIVNTNVPR	62.46	1286.68	11	-2.9	644.346	61.12	549000	3	F3:38624	WF2_80uL_long_1.raw	2	2	sp|P14174|MIF_HUMAN
SLAELGGHLDQ(+.98)QV	62.41	1366.67	13	-1.2	684.343	67.88	3970000	1	F1:28214	WF1_80uL_long_1.raw	10	10	sp|P06727|APOA4_HUMAN	Deamidation (NQ)	Q11:Deamidation (NQ):40.00
VEGSDAEIGM(+15.99)SPWQV	62.4	1619.71	15	2.8	810.866	89.96	3070000	3	F3:60009	WF2_80uL_long_1.raw	11	11	sp|P00734|THRB_HUMAN	Oxidation (M)	M10:Oxidation (M):1000.00
DLEEVKAKVQPY	62.4	1417.75	12	2.3	709.881	33.74	11000000	9	F9:16111	WF5_80uL_long_1.raw	20	20	sp|P02647|APOA1_HUMAN
ELGGHLDQQVEEF	62.38	1499.69	13	2.2	750.854	63.2	244000000	16	F16:24135	170303_WF3_2.raw	7	7	sp|P06727|APOA4_HUMAN
VLTIDEKGTEAA	62.38	1245.65	12	1.5	623.831	21.65	71900000	10	F10:9869	WF5_80uL_long_2.raw	17	17	sp|P01009|A1AT_HUMAN
NVHSGSTFFKYYLQGA	62.38	1817.87	16	1.2	909.945	68.27	13200000	16	F16:25713	170303_WF3_2.raw	5	5	sp|Q14624|ITIH4_HUMAN
FESFGDLSTPDAV	62.37	1383.62	13	3.1	692.819	101.68	17000000	9	F9:48897	WF5_80uL_long_1.raw	17	17	sp|P68871|HBB_HUMAN
PGFFSPM(+15.99)LGEFV	62.37	1342.63	12	2.2	672.322	115.91	5990000	1	F1:59370	WF1_80uL_long_1.raw	16	16	sp|P02671|FIBA_HUMAN	Oxidation (M)	M7:Oxidation (M):1000.00
TPFVTHPGYDTGN(+.98)GI	62.37	1575.72	15	3.9	788.871	55.96	4770000	4	F4:27932	WF2_80uL_long_2.raw	15	15	sp|P02751|FINC_HUMAN	Deamidation (NQ)	N13:Deamidation (NQ):1000.00
VADALTNAVAHVDDM(+15.99)PN	62.37	1767.81	17	1.9	884.914	62.57	531000	15	F15:23680	170303_WF3_1.raw	5	5	sp|P69905|HBA_HUMAN	Oxidation (M)	M15:Oxidation (M):1000.00
TSLLPQLIEVSSPI	62.36	1495.85	14	1.5	748.933	115.63	223000000	3	F3:81238	WF2_80uL_long_1.raw	21	21	sp|P04114|APOB_HUMAN
LDDDLEHQGGHVLDHGHKH	62.34	2157.99	19	0.4	720.339	11.57	6940000	15	F15:2989	170303_WF3_1.raw	16	16	sp|P01042|KNG1_HUMAN
M(+15.99)NSFVNDIFER	62.34	1386.62	11	1.5	694.32	87.02	4410000	1	F1:39646	WF1_80uL_long_1.raw	17	17		Oxidation (M)	M1:Oxidation (M):1000.00
GKTFPGFF	62.34	899.454	8	1.7	450.735	74.67	4290000	10	F10:38315	WF5_80uL_long_2.raw	6	6	sp|P02671|FIBA_HUMAN
SALEEYTKKLN(+.98)TQ	62.34	1524.77	13	3.7	763.394	28.39	6470000	10	F10:13437	WF5_80uL_long_2.raw	10	10	sp|P02647|APOA1_HUMAN	Deamidation (NQ)	N11:Deamidation (NQ):45.01
HASLDKFLASVSTVLTSKYR	62.33	2222.21	20	1.5	556.56	101.28	53600000	12	F12:52991	170303_WF1_3.raw	7	7	sp|P69905|HBA_HUMAN
LYKVSNGAGTM(+15.99)SV	62.32	1341.66	13	1.5	671.838	17.36	673000	11	F11:7700	170303_WF1_2.raw	6	6	sp|P06396|GELS_HUMAN	Oxidation (M)	M11:Oxidation (M):1000.00
LPAQLPAEKEVGPPLP	62.31	1654.93	16	3.5	828.475	73.01	696000	8	F8:32799	WF4_80uL_long_2.raw	4	4	sp|Q16610|ECM1_HUMAN
SVLVM(+15.99)PTFHVPF	62.31	1388.72	12	4.1	695.368	103.59	4480000	3	F3:70222	WF2_80uL_long_1.raw	12	12	sp|P04114|APOB_HUMAN	Oxidation (M)	M5:Oxidation (M):1000.00
LFAQINQGESITHA	62.29	1527.77	14	1.4	764.892	52.71	312000	8	F8:23196	WF4_80uL_long_2.raw	3	3	sp|Q01518|CAP1_HUMAN
WGKVNVDEV	62.29	1044.52	9	1.4	523.27	35.21	93400000	20	F20:15957	170303_WF5_2.raw	16	16	sp|P68871|HBB_HUMAN
VTNWDDM(+15.99)EKI	62.28	1265.56	10	0.6	633.788	31.46	13900000	11	F11:17645	170303_WF1_2.raw	11	11	sp|P60709|ACTB_HUMAN:sp|P63261|ACTG_HUMAN	Oxidation (M)	M7:Oxidation (M):1000.00
FELEADEREPT	62.27	1334.6	11	0.6	668.307	33.15	2060000	4	F4:15694	WF2_80uL_long_2.raw	5	5	sp|P01019|ANGT_HUMAN
PGSSGTGGTATWKPGSS	62.24	1533.71	17	0.1	767.86	14.85	1100000	16	F16:5023	170303_WF3_2.raw	5	5	sp|P02671|FIBA_HUMAN
VHLTPEEKSAV	62.23	1208.64	11	1.7	605.328	12.46	50900000	10	F10:3686	WF5_80uL_long_2.raw	17	17	sp|P68871|HBB_HUMAN
YDLDPGAGSLEI	62.23	1248.59	12	2.4	625.303	103.27	45700000	5	F5:43976	WF3_80uL_long_1.raw	18	18	sp|Q13790|APOF_HUMAN
SVLGQLGITKV	62.21	1113.68	11	0.6	557.846	76.45	28000000	16	F16:28768	170303_WF3_2.raw	20	20	sp|P01009|A1AT_HUMAN
YLTSYQPPQNPYY	62.19	1632.75	13	-0.2	817.38	83.1	540000	10	F10:43312	WF5_80uL_long_2.raw	11	11	sp|Q06033|ITIH3_HUMAN
VLGQLGITKVF	62.15	1173.71	11	1.1	587.864	86.78	3850000	7	F7:42068	WF4_80uL_long_1.raw	14	14	sp|P01009|A1AT_HUMAN
HRHPDEAAFF	62.12	1225.56	10	0.3	613.789	16.72	6730000	8	F8:6333	WF4_80uL_long_2.raw	8	8	sp|P02671|FIBA_HUMAN
SLPELEQQQEQQQE	62.12	1712.79	14	4.7	857.404	40.02	11700000	9	F9:19171	WF5_80uL_long_1.raw	15	15	sp|P06727|APOA4_HUMAN
SDGLAHLDNL	62.11	1053.51	10	1.3	527.763	48.43	198000000	13	F13:26863	170303_WF2_1.raw	17	17	sp|P68871|HBB_HUMAN:sp|P02042|HBD_HUMAN
FLGDIALDEEDLR	62.1	1504.74	13	0.9	753.378	95.51	102000	6	F6:40346	WF3_80uL_long_2.raw	3	3	sp|P13497|BMP1_HUMAN
AAWGKVGAHAGEYGAEALE	62.09	1885.9	19	0.8	943.956	45.25	1440000	6	F6:19226	WF3_80uL_long_2.raw	6	6	sp|P69905|HBA_HUMAN
AGDVEGHLSF	62.09	1030.47	10	2.5	516.245	38.71	25500000	14	F14:18159	170303_WF2_2.raw	16	16	sp|P06727|APOA4_HUMAN
TLSEKAKPALEDL	62.08	1413.77	13	1.7	707.894	29.06	3400000	8	F8:12426	WF4_80uL_long_2.raw	9	9	sp|P02647|APOA1_HUMAN
SLDKFLASVSTV	62.07	1265.69	12	3.3	633.853	97.59	30900000	10	F10:51603	WF5_80uL_long_2.raw	15	15	sp|P69905|HBA_HUMAN
HIADLAGNSEV	62.06	1124.55	11	1.6	563.281	25.85	9530000	3	F3:13593	WF2_80uL_long_1.raw	9	9	sp|P06733|ENOA_HUMAN
ELLFRPDLIGEESEGI	62.06	1815.93	16	2.4	908.972	108.25	920000	3	F3:74414	WF2_80uL_long_1.raw	7	7	sp|P61163|ACTZ_HUMAN
VEQGFTVPEIKTI	62.04	1459.79	13	0.5	730.904	83.24	8470000	4	F4:44713	WF2_80uL_long_2.raw	10	10	sp|P04114|APOB_HUMAN
ILDLTQNTYQHFYDGSEI	62.01	2156.01	18	1.3	1079.01	104.23	8940000	11	F11:68779	170303_WF1_2.raw	12	12	sp|Q06033|ITIH3_HUMAN
DVFVPDDKQEFV	61.99	1436.68	12	2.9	719.351	79.13	22500000	5	F5:33038	WF3_80uL_long_1.raw	13	13	sp|P12883|MYH7_HUMAN
QRIFENGYDPV	61.97	1336.64	11	0.4	669.328	49.23	28300000	13	F13:27150	170303_WF2_1.raw	18	18	sp|P08246|ELNE_HUMAN
FFTREPQDTY	61.96	1302.59	10	1.8	652.302	34.41	18000000	4	F4:16670	WF2_80uL_long_2.raw	13	13	sp|P10909|CLUS_HUMAN
LVSQYFQTVTDY	61.95	1462.7	12	3.8	732.359	101.72	6130	9	F9:48924	WF5_80uL_long_1.raw	1	1	sp|P02652|APOA2_HUMAN
TLYSYKVQSTIT	61.94	1402.73	12	1.9	702.376	49.75	5120000	1	F1:19063	WF1_80uL_long_1.raw	11	11	sp|P19823|ITIH2_HUMAN
DGAIDLGYDLLM(+15.99)T	61.91	1411.65	13	2.6	706.836	116.35	202000	4	F4:67271	WF2_80uL_long_2.raw	3	3	sp|Q13790|APOF_HUMAN	Oxidation (M)	M12:Oxidation (M):1000.00
GADLSGVTEEAPLKL	61.91	1498.79	15	1	750.402	82.13	1210000	6	F6:34921	WF3_80uL_long_2.raw	10	10	sp|P01009|A1AT_HUMAN
TAGYGINILGM(+15.99)DPL	61.91	1449.72	14	2.5	725.868	109.37	1620000	7	F7:54334	WF4_80uL_long_1.raw	4	4	sp|P02748|CO9_HUMAN	Oxidation (M)	M11:Oxidation (M):1000.00
LGEFVSETESRGSESG	61.89	1669.74	16	4.4	835.883	29.59	107000	8	F8:12670	WF4_80uL_long_2.raw	2	2	sp|P02671|FIBA_HUMAN
AVLEYLTAEILEL	61.88	1475.81	13	4.2	738.917	117.85	1070000	19	F19:62852	170303_WF5_1.raw	6	6	sp|Q6FI13|H2A2A_HUMAN:sp|O75367|H2AY_HUMAN
DVSSALDKLKEF	61.86	1350.7	12	0.7	676.359	85.29	13700000	13	F13:49980	170303_WF2_1.raw	8	8	sp|P02654|APOC1_HUMAN
LHELQEKLSPLGEEM(+15.99)RD	61.8	2039	17	2.6	680.676	28.85	113000000	8	F8:13108	WF4_80uL_long_2.raw	21	21	sp|P02647|APOA1_HUMAN	Oxidation (M)	M15:Oxidation (M):1000.00
WGKVNVDEVGGEALG	61.78	1528.75	15	2.9	765.385	62.42	7230000	8	F8:28063	WF4_80uL_long_2.raw	15	15	sp|P68871|HBB_HUMAN
VDESDAFHDNL	61.76	1260.53	11	-3.6	631.268	41.28	421000	9	F9:19720	WF5_80uL_long_1.raw	6	6	sp|P10124|SRGN_HUMAN
KDTGTYEDFVEGL	61.76	1472.67	13	1.2	737.342	92.51	360000	9	F9:44345	WF5_80uL_long_1.raw	5	5	sp|P08590|MYL3_HUMAN
RVEPYGENFNKALVQQM(+15.99)EQL	61.74	2408.18	20	2.9	803.736	63.62	8000000	6	F6:27152	WF3_80uL_long_2.raw	8	8	sp|P06727|APOA4_HUMAN	Oxidation (M)	M17:Oxidation (M):1000.00
SLEDKTERELL	61.7	1331.69	11	2.3	666.855	32.21	125000000	17	F17:13673	170303_WF4_1.raw	17	17	sp|P00734|THRB_HUMAN
SLVSQYFQTV	61.67	1170.59	10	0.4	586.303	106.13	3840000	17	F17:43009	170303_WF4_1.raw	17	16	sp|P02652|APOA2_HUMAN
VSFLSALEEYTKKLNT	61.67	1841.98	16	4.2	922	108.42	1930000	16	F16:42871	170303_WF3_2.raw	8	8	sp|P02647|APOA1_HUMAN
M(+15.99)IEQNTKSPLFM(+15.99)	61.66	1469.69	12	-0.9	735.851	31.52	632000	9	F9:15064	WF5_80uL_long_1.raw	8	8	sp|P01009|A1AT_HUMAN	Oxidation (M)	M1:Oxidation (M):1000.00;M12:Oxidation (M):1000.00
LGQGVNHAADQAGKEVE	61.66	1721.83	17	1.8	574.953	13.05	2850000	7	F7:3827	WF4_80uL_long_1.raw	5	5	sp|Q6UWP8|SBSN_HUMAN
TENLLGSYFPK	61.65	1267.64	11	2.1	634.831	78.62	3070000	10	F10:40617	WF5_80uL_long_2.raw	7	7	sp|Q06323|PSME1_HUMAN
TLSLPELEQQQEQQQEQQ	61.64	2183.03	18	2.1	728.687	77.74	6430000	4	F4:41339	WF2_80uL_long_2.raw	6	6	sp|P06727|APOA4_HUMAN
SLPGESEEM(+15.99)M(+15.99)EEVDQV	61.62	1839.74	16	1.2	920.878	56.61	6140000	3	F3:35362	WF2_80uL_long_1.raw	18	18	sp|P19823|ITIH2_HUMAN	Oxidation (M)	M9:Oxidation (M):1000.00;M10:Oxidation (M):1000.00
YLVGLFEDTNL	61.62	1282.64	11	2.4	642.331	112.92	345000	10	F10:63521	WF5_80uL_long_2.raw	3	3	sp|Q71DI3|H32_HUMAN:sp|P84243|H33_HUMAN
PM(+15.99)SIPPEVKF	61.62	1159.59	10	2.1	580.806	52.51	48600000	9	F9:27564	WF5_80uL_long_1.raw	16	16	sp|P01009|A1AT_HUMAN	Oxidation (M)	M2:Oxidation (M):1000.00
AVGKVIPELNGKLTGM(+15.99)AF	61.58	1860.02	18	0.6	931.017	68.92	515000000	12	F12:34213	170303_WF1_3.raw	29	29	sp|P04406|G3P_HUMAN	Oxidation (M)	M16:Oxidation (M):1000.00
NLQNNAEWVYQGAIR	61.58	1774.88	15	4.6	888.449	73.22	17400	13	F13:41931	170303_WF2_1.raw	2	2	sp|P04114|APOB_HUMAN
TLEIPGN(+.98)SDPNM(+15.99)IPDGDFN	61.58	2061.88	19	3.2	1031.95	101.26	44700000	3	F3:69516	WF2_80uL_long_1.raw	9	9		Deamidation (NQ); Oxidation (M)	N7:Deamidation (NQ):39.02;M12:Oxidation (M):1000.00
SLLPQLIEVSSPI	61.56	1394.8	13	3.4	698.411	115.13	221000000	3	F3:80621	WF2_80uL_long_1.raw	23	23	sp|P04114|APOB_HUMAN
LDNWDSVTSTFSKL	61.55	1611.78	14	0.5	806.897	105.63	1660000	7	F7:51702	WF4_80uL_long_1.raw	9	9	sp|P02647|APOA1_HUMAN
HAGEYGAEALERM(+15.99)FL	61.54	1708.79	15	-2	855.399	79.67	138000000	11	F11:50250	170303_WF1_2.raw	41	41	sp|P69905|HBA_HUMAN	Oxidation (M)	M13:Oxidation (M):1000.00
VFLM(+15.99)IEQNTKSPLFM(+15.99)G	61.53	1885.93	16	3.4	943.976	93.78	9590000	10	F10:49413	WF5_80uL_long_2.raw	10	10	sp|P01009|A1AT_HUMAN	Oxidation (M)	M4:Oxidation (M):1000.00;M15:Oxidation (M):1000.00
VVAGKLQDRGPDV	61.51	1352.74	13	0.6	677.378	13.55	1590000	8	F8:4149	WF4_80uL_long_2.raw	4	4	sp|Q14624|ITIH4_HUMAN
VEGDLKGPEADI	61.51	1241.61	12	-3.5	621.812	33	811000	19	F19:15202	170303_WF5_1.raw	6	6	sp|Q09666|AHNK_HUMAN
LSYFVELGTQPATQ	61.49	1552.78	14	3.7	777.399	101.16	1110000	4	F4:55781	WF2_80uL_long_2.raw	3	3	sp|P02652|APOA2_HUMAN
YRSGGGFSSGSAGII	61.49	1414.68	15	4	708.352	40.17	451000	20	F20:18380	170303_WF5_2.raw	3	3	sp|P04264|K2C1_HUMAN
FLENVIRDAV	61.42	1174.63	10	1.7	588.326	82.29	494000000	19	F19:39268	170303_WF5_1.raw	26	26	sp|P62805|H4_HUMAN
FQTVTDYGKDL	61.39	1285.62	11	1.9	643.818	53.21	2800000	9	F9:25003	WF5_80uL_long_1.raw	14	14	sp|P02652|APOA2_HUMAN
GDVEGHLSFLE	61.35	1201.56	11	1.2	601.789	67.63	110000000	11	F11:42859	170303_WF1_2.raw	13	13	sp|P06727|APOA4_HUMAN
WDNLEKETEGL	61.34	1332.62	11	2.9	667.319	59.42	72500000	10	F10:29311	WF5_80uL_long_2.raw	14	14	sp|P02647|APOA1_HUMAN
FPEVDVLTKY	61.34	1209.63	10	-3	605.819	84.64	282000	13	F13:49522	170303_WF2_1.raw	5	5	sp|P04114|APOB_HUMAN
SYFEKSKEQLTPLIK	61.34	1809.99	15	3	604.338	40.25	4170000	14	F14:18984	170303_WF2_2.raw	5	5	sp|P02652|APOA2_HUMAN
LGEFVSETESRGSES	61.33	1612.72	15	0.5	807.369	29.13	137000	7	F7:13075	WF4_80uL_long_1.raw	3	3	sp|P02671|FIBA_HUMAN
GDKLFGPDL	61.32	960.492	9	-0.2	481.253	56.65	473000000	11	F11:35231	170303_WF1_2.raw	28	28	sp|P08697|A2AP_HUMAN
ALEEYTKKLNTQ	61.32	1436.75	12	0.2	719.383	19.29	2120000	11	F11:9166	170303_WF1_2.raw	5	5	sp|P02647|APOA1_HUMAN
SLLSFM(+15.99)QGYM(+15.99)K	61.29	1335.62	11	1.2	668.818	52.54	15000000	13	F13:29328	170303_WF2_1.raw	16	16	sp|P02656|APOC3_HUMAN	Oxidation (M)	M6:Oxidation (M):1000.00;M10:Oxidation (M):1000.00
NLAEFAFSLY	61.28	1173.57	10	0.4	587.793	116.62	80900	5	F5:51999	WF3_80uL_long_1.raw	2	2	sp|P01009|A1AT_HUMAN
DSPGSGNARPNNPDWGTF	61.28	1887.81	18	1.8	944.916	63.64	7220000	1	F1:26058	WF1_80uL_long_1.raw	10	10	sp|P02671|FIBA_HUMAN
SIATAFAM(+15.99)LSLGT	61.25	1297.66	13	2.7	649.838	112.25	7150000	5	F5:49846	WF3_80uL_long_1.raw	14	14	sp|P01009|A1AT_HUMAN	Oxidation (M)	M8:Oxidation (M):1000.00
WLAVNDYYDM(+15.99)VGI	61.25	1573.71	13	-0.2	787.863	111.65	748000	2	F2:58261	WF1_80uL_long_2.raw	6	6	sp|P02747|C1QC_HUMAN	Oxidation (M)	M10:Oxidation (M):1000.00
FITHAPPGEFNEVF	61.23	1603.77	14	3.4	802.894	85.89	14500000	4	F4:46417	WF2_80uL_long_2.raw	12	12	sp|P52907|CAZA1_HUMAN
STGQWHSESGSF	61.21	1308.54	12	1.1	655.277	22.68	6780000	3	F3:11057	WF2_80uL_long_1.raw	12	12	sp|P02671|FIBA_HUMAN
LLDNWDSVTSTF	61.2	1396.65	12	1.1	699.334	111.34	1920000	4	F4:63729	WF2_80uL_long_2.raw	7	7	sp|P02647|APOA1_HUMAN
KIVLDPSGSMNI	61.18	1272.67	12	1.5	637.346	66.91	99900	4	F4:34548	WF2_80uL_long_2.raw	1	1	sp|P00751|CFAB_HUMAN
DIDTPDINIEGSEGKF	61.16	1748.81	16	1.6	875.414	88.75	162000	3	F3:58977	WF2_80uL_long_1.raw	4	4	sp|Q09666|AHNK_HUMAN
LLQDFFN(+.98)GKELN	61.15	1437.71	12	4.5	719.867	93.85	1170000	4	F4:50929	WF2_80uL_long_2.raw	9	9	sp|P11142|HSP7C_HUMAN	Deamidation (NQ)	N7:Deamidation (NQ):56.14
AKPSVSVEFV	61.14	1061.58	10	2.2	531.796	41.2	55200000	13	F13:22649	170303_WF2_1.raw	18	18	sp|P04114|APOB_HUMAN
SHHPGIAEFPS	61.11	1177.55	11	0.2	589.783	16.92	234000000	13	F13:7319	170303_WF2_1.raw	18	18	sp|P02671|FIBA_HUMAN
VLEYLTAEILELAGNA	61.1	1717.91	16	1.3	859.965	117.91	0	1	F1:61089	WF1_80uL_long_1.raw	0	0	sp|Q6FI13|H2A2A_HUMAN:sp|O75367|H2AY_HUMAN
GINILGM(+15.99)DPLSTPF	61.08	1489.75	14	1	745.882	114.64	126000	8	F8:54183	WF4_80uL_long_2.raw	2	2	sp|P02748|CO9_HUMAN	Oxidation (M)	M7:Oxidation (M):1000.00
KLLLQM(+15.99)DSSATAYGSTV	61.05	1799.9	17	2.5	900.958	56.79	9120000	3	F3:35502	WF2_80uL_long_1.raw	11	11	sp|P04114|APOB_HUMAN	Oxidation (M)	M6:Oxidation (M):1000.00
SGTGGTATWKPGSSGP	61.05	1446.67	16	4.2	724.347	17.43	9500000	15	F15:6538	170303_WF3_1.raw	13	13	sp|P02671|FIBA_HUMAN
NWEEEAASGLLT	61.03	1318.6	12	-1	660.309	103.52	4520000	3	F3:70158	WF2_80uL_long_1.raw	11	11	sp|P04114|APOB_HUMAN
HAQEEAEAEAELPPSSEV	60.98	1921.85	18	1.3	961.936	40.48	1450000	16	F16:16032	170303_WF3_2.raw	4	4	sp|Q6UXB8|PI16_HUMAN
DTASTGKTFPGFFS	60.95	1461.68	14	2.4	731.848	85.64	1290000	3	F3:56939	WF2_80uL_long_1.raw	3	3	sp|P02671|FIBA_HUMAN
DALTNAVAHVD	60.94	1124.55	11	1.2	563.281	51.68	33700	6	F6:21763	WF3_80uL_long_2.raw	1	1	sp|P69905|HBA_HUMAN
DLGTLSGIGTLDGFRH	60.93	1657.84	16	2.1	829.93	94.29	140000	15	F15:35536	170303_WF3_1.raw	2	2	sp|P02671|FIBA_HUMAN
SLM(+15.99)PFSPYEPLNF	60.92	1556.72	13	0.5	779.369	113.16	3630000	17	F17:47586	170303_WF4_1.raw	17	17	sp|P10909|CLUS_HUMAN	Oxidation (M)	M3:Oxidation (M):1000.00
ILGYTEHQVV	60.92	1157.61	10	2.7	579.813	41.64	47400000	3	F3:24939	WF2_80uL_long_1.raw	12	12	sp|P04406|G3P_HUMAN
ILVSDGDPTVGELKLS	60.91	1641.88	16	1.6	821.95	81.19	36000	10	F10:42153	WF5_80uL_long_2.raw	4	4	sp|P19823|ITIH2_HUMAN
VADALTNAVAHVDDM(+15.99)PNA	60.9	1838.85	18	2.6	920.433	66.2	6030000	5	F5:27715	WF3_80uL_long_1.raw	8	8	sp|P69905|HBA_HUMAN	Oxidation (M)	M15:Oxidation (M):1000.00
RVEPYGENFNKA	60.89	1422.69	12	0.6	475.237	14.2	3240000	16	F16:4622	170303_WF3_2.raw	9	9	sp|P06727|APOA4_HUMAN
SM(+15.99)PSFSILGSDVRVPSYTL	60.89	2071.03	19	-0.4	1036.52	108	7830000	3	F3:74178	WF2_80uL_long_1.raw	14	14	sp|P04114|APOB_HUMAN	Oxidation (M)	M2:Oxidation (M):1000.00
VLDLPDLPEDKL	60.88	1365.74	12	2.6	683.879	101.25	2260000	3	F3:68324	WF2_80uL_long_1.raw	11	11	sp|Q9Y4L1|HYOU1_HUMAN
LGPHAGDVEGHL	60.88	1200.59	12	-0.7	401.203	18.64	13800000	20	F20:7541	170303_WF5_2.raw	19	19	sp|P06727|APOA4_HUMAN
NDPFIDLNYM(+15.99)V	60.88	1355.61	11	2.5	678.812	108.33	7710000	9	F9:54243	WF5_80uL_long_1.raw	14	14	sp|P04406|G3P_HUMAN	Oxidation (M)	M10:Oxidation (M):1000.00
LVEQGFTVPEIKT	60.87	1459.79	13	1.3	730.904	80.42	1380000	1	F1:35648	WF1_80uL_long_1.raw	6	6	sp|P04114|APOB_HUMAN
QFTSSTSYNRGDSTFES	60.83	1912.81	17	4.1	957.415	29.38	170000	5	F5:11616	WF3_80uL_long_1.raw	4	4	sp|P02671|FIBA_HUMAN
LLPQLIEVSSPI	60.83	1307.77	12	2.5	654.894	111.18	14900000	10	F10:62115	WF5_80uL_long_2.raw	20	20	sp|P04114|APOB_HUMAN
YVNKEIQNAVN(+.98)GVKQI	60.81	1816.97	16	4.8	606.666	30.22	9040000	8	F8:13066	WF4_80uL_long_2.raw	10	10	sp|P10909|CLUS_HUMAN	Deamidation (NQ)	N11:Deamidation (NQ):78.06
ILGQEFDEVTADDR	60.8	1606.75	14	2.3	804.383	62.77	19500	8	F8:28113	WF4_80uL_long_2.raw	1	1	sp|P15090|FABP4_HUMAN
GVANALAHKYH	60.79	1179.61	11	-0.1	590.815	13.65	7610000	13	F13:4955	170303_WF2_1.raw	12	12	sp|P68871|HBB_HUMAN:sp|P02042|HBD_HUMAN
RLLLPGELAKHAVSEG	60.78	1688.96	16	1.6	563.994	42.21	17700000	17	F17:17911	170303_WF4_1.raw	6	6
LPDRVTGVDTD	60.77	1186.58	11	0.4	594.299	21.71	7200000	10	F10:9748	WF5_80uL_long_2.raw	13	12	sp|P19827|ITIH1_HUMAN
IEELNPGDALEPEGR	60.76	1637.79	15	0.8	819.903	56.53	1040000	10	F10:27631	WF5_80uL_long_2.raw	5	5	sp|Q9NQ79|CRAC1_HUMAN
AGTELVNFLSYFVELGTQPATQ	60.75	2384.19	22	1.2	795.738	117.92	47200000	1	F1:61101	WF1_80uL_long_1.raw	23	23	sp|P02652|APOA2_HUMAN
AGTELVNFLSYFVELGTQPA	60.74	2155.08	20	1.2	1078.55	117.91	3900000	9	F9:61835	WF5_80uL_long_1.raw	11	11	sp|P02652|APOA2_HUMAN
NKDQGTYEDYVEGL	60.73	1629.72	14	3.3	815.868	69.09	1940000	9	F9:32882	WF5_80uL_long_1.raw	11	11	sp|P60660|MYL6_HUMAN
FTVDDVIQTGVDNPGHPF	60.72	1956.92	18	2.4	979.471	104.21	1600000	7	F7:50682	WF4_80uL_long_1.raw	9	9	sp|P06732|KCRM_HUMAN
EEEAPAPEVGA	60.72	1097.49	11	1.5	549.752	23.22	5060000	3	F3:11476	WF2_80uL_long_1.raw	9	9	sp|P04004|VTNC_HUMAN
KLQQTYAALNSKATFYGEQV	60.71	2259.15	20	-0.2	1130.58	60.83	14300000	13	F13:34141	170303_WF2_1.raw	8	8	sp|P46940|IQGA1_HUMAN
ALNLPTLPEVKFPE	60.71	1566.87	14	1.4	784.441	107.09	83100	4	F4:60501	WF2_80uL_long_2.raw	2	2	sp|P04114|APOB_HUMAN
VFLM(+15.99)IEQNTKSPL	60.7	1534.81	13	1.9	768.412	72.53	6850000	9	F9:34494	WF5_80uL_long_1.raw	5	5	sp|P01009|A1AT_HUMAN	Oxidation (M)	M4:Oxidation (M):1000.00
LLLRLAKTYET	60.69	1319.78	11	0.8	660.898	40.74	48800000	11	F11:23968	170303_WF1_2.raw	13	13	sp|P02768|ALBU_HUMAN
IVTNWDDM(+15.99)EKI	60.67	1378.64	11	1.8	690.33	48.09	6330000	10	F10:22886	WF5_80uL_long_2.raw	10	10	sp|P60709|ACTB_HUMAN:sp|P63261|ACTG_HUMAN	Oxidation (M)	M8:Oxidation (M):1000.00
GLSPGVTYYFKV	60.66	1329.7	12	2.6	665.857	88.55	1150000	4	F4:47814	WF2_80uL_long_2.raw	7	7	sp|P02751|FINC_HUMAN
ELERPGGN(+.98)EIT	60.64	1214.58	11	3.1	608.298	20.68	367000000	10	F10:9326	WF5_80uL_long_2.raw	18	18	sp|P02671|FIBA_HUMAN	Deamidation (NQ)	N8:Deamidation (NQ):1000.00
HHPGIAEFPS	60.64	1090.52	10	1	546.268	17.38	288000000	9	F9:7293	WF5_80uL_long_1.raw	20	20	sp|P02671|FIBA_HUMAN
LLEGKVLPGVDALSNI	60.63	1636.94	16	1.8	819.479	103.94	1100000	8	F8:47313	WF4_80uL_long_2.raw	9	9	sp|P00558|PGK1_HUMAN
SDPNM(+15.99)IPDGDFNSYV	60.62	1685.69	15	1.9	843.853	96.1	1000000	6	F6:40599	WF3_80uL_long_2.raw	3	3		Oxidation (M)	M5:Oxidation (M):1000.00
DVVM(+15.99)TQSPLSLPV	60.61	1400.72	13	2.2	701.37	106.44	130000000	6	F6:46942	WF3_80uL_long_2.raw	21	21	sp|A0A075B6S6|KVD30_HUMAN:sp|P06310|KV230_HUMAN	Oxidation (M)	M4:Oxidation (M):1000.00
ADEFKVKIDQTVEELR	60.6	1919	16	2.7	960.51	65.35	36400000	11	F11:40412	170303_WF1_2.raw	29	29	sp|P06727|APOA4_HUMAN
LLVVYPWTQ	60.59	1117.62	9	1.8	559.817	109.33	241000	8	F8:50930	WF4_80uL_long_2.raw	4	4	sp|P68871|HBB_HUMAN:sp|P02042|HBD_HUMAN:sp|P69891|HBG1_HUMAN:sp|P69892|HBG2_HUMAN
TVSWNSGALTSGVHTFPA	60.59	1830.89	18	1.5	916.454	91.67	7930000	1	F1:42354	WF1_80uL_long_1.raw	11	11	sp|P0DOX5|IGG1_HUMAN
TYFPHFDLSH	60.57	1262.57	10	0.1	632.293	63.88	98200000	12	F12:31402	170303_WF1_3.raw	22	22	sp|P69905|HBA_HUMAN
ALLEIPLTVTHPV	60.57	1401.82	13	3.2	701.921	100.91	31100000	16	F16:37960	170303_WF3_2.raw	24	24	sp|P01023|A2MG_HUMAN
YLAAVLEYLTAEILE	60.55	1709.91	15	0.8	855.964	118.14	32100	1	F1:61295	WF1_80uL_long_1.raw	1	1
APPPISGGGY	60.54	914.45	10	1.8	458.233	29.48	2360000	6	F6:12230	WF3_80uL_long_2.raw	5	5	sp|P02675|FIBB_HUMAN
TALWGKVNVDEVGGEAL	60.54	1756.9	17	0.3	879.457	94.14	716000	8	F8:42006	WF4_80uL_long_2.raw	9	9	sp|P68871|HBB_HUMAN
M(+15.99)IEQNTKSPLF	60.51	1322.65	11	2.8	662.336	33.49	16300000	10	F10:16134	WF5_80uL_long_2.raw	13	13	sp|P01009|A1AT_HUMAN	Oxidation (M)	M1:Oxidation (M):1000.00
VHLTPEEKSAVTALWGKV	60.51	1964.07	18	2.3	655.7	79.98	2700000	10	F10:41379	WF5_80uL_long_2.raw	6	6	sp|P68871|HBB_HUMAN
NNFHNYFGGSEI	60.51	1397.6	12	1.9	699.809	60.66	4790000	10	F10:29958	WF5_80uL_long_2.raw	10	10	sp|P19823|ITIH2_HUMAN
TPDVSSALDKLKEF	60.49	1548.8	14	2	517.276	91.97	2280000	3	F3:61265	WF2_80uL_long_1.raw	2	2	sp|P02654|APOC1_HUMAN
GEVQAM(+15.99)LGQSTEELRV	60.49	1761.86	16	3.9	881.939	57.49	551000	7	F7:27125	WF4_80uL_long_1.raw	9	9	sp|P02649|APOE_HUMAN	Oxidation (M)	M6:Oxidation (M):1000.00
IPELN(+.98)GKLTGM(+15.99)AF	60.47	1406.71	13	-2.3	704.361	80.68	18400000	11	F11:50996	170303_WF1_2.raw	12	12	sp|P04406|G3P_HUMAN	Deamidation (NQ); Oxidation (M)	N5:Deamidation (NQ):1000.00;M11:Oxidation (M):1000.00
VGAHAGEYGAEALERM(+15.99)	60.43	1675.76	16	1.2	838.889	19.33	46600000	9	F9:8454	WF5_80uL_long_1.raw	18	18	sp|P69905|HBA_HUMAN	Oxidation (M)	M16:Oxidation (M):1000.00
SKDLEEVKAKVQPY	60.42	1632.87	14	1.4	545.299	18.67	10400000	7	F7:7856	WF4_80uL_long_1.raw	9	9	sp|P02647|APOA1_HUMAN
AGTELVNFLSYFV	60.42	1458.74	13	2.2	730.379	117.94	847000	1	F1:61119	WF1_80uL_long_1.raw	8	8	sp|P02652|APOA2_HUMAN
NDIFERIAGEAS	60.4	1320.63	12	0.6	661.323	75.13	7470000	12	F12:37275	170303_WF1_3.raw	13	13
NVQFNYPHTSVT	60.37	1405.66	12	3.5	703.841	40.87	2120000	9	F9:19532	WF5_80uL_long_1.raw	8	8	sp|P19823|ITIH2_HUMAN
LTSYQPPQNPYYYVDGD	60.37	2018.89	17	-2.5	1010.45	95.98	5850000	20	F20:46974	170303_WF5_2.raw	11	11	sp|Q06033|ITIH3_HUMAN
VADALTNAVAHVD	60.37	1294.65	13	1.5	648.334	51.8	187000	15	F15:19743	170303_WF3_1.raw	3	3	sp|P69905|HBA_HUMAN
SN(+.98)GADLSGVTEEAPLKLS	60.37	1787.88	18	3.3	894.95	78.66	2300000	20	F20:36889	170303_WF5_2.raw	10	10	sp|P01009|A1AT_HUMAN	Deamidation (NQ)	N2:Deamidation (NQ):1000.00
AFGFASADLIEI	60.35	1252.63	12	-0.4	627.324	116.74	9160000	1	F1:60022	WF1_80uL_long_1.raw	15	15	sp|P04114|APOB_HUMAN
M(+15.99)NPYM(+15.99)KLAPGELT	60.35	1495.71	13	1.5	748.861	41.67	17400000	4	F4:20154	WF2_80uL_long_2.raw	16	16	sp|P04114|APOB_HUMAN	Oxidation (M)	M1:Oxidation (M):1000.00;M5:Oxidation (M):1000.00
VEVVDEERY	60.34	1136.53	9	4.2	569.277	22.13	1340000	20	F20:9506	170303_WF5_2.raw	8	8	sp|P19237|TNNI1_HUMAN
SVLPEGGETPLF	60.33	1244.63	12	-2.4	623.32	104.07	2740000	15	F15:40336	170303_WF3_1.raw	16	16	sp|P06396|GELS_HUMAN
TFPGFFSPM(+15.99)LGEF	60.33	1491.67	13	1.3	746.846	117.3	2740000	4	F4:67984	WF2_80uL_long_2.raw	8	8	sp|P02671|FIBA_HUMAN	Oxidation (M)	M9:Oxidation (M):1000.00
TYTVLQNEDTKSG	60.32	1454.69	13	1.9	728.353	20.43	1720000	2	F2:5793	WF1_80uL_long_2.raw	10	10	sp|P00450|CERU_HUMAN
TFPGFFSPM(+15.99)LGE	60.3	1344.61	12	1.5	673.311	110.99	19800000	8	F8:52134	WF4_80uL_long_2.raw	18	18	sp|P02671|FIBA_HUMAN	Oxidation (M)	M9:Oxidation (M):1000.00
TLSLPELEQQQEQQQ	60.29	1797.87	15	-2	899.943	78.98	11300	3	F3:51822	WF2_80uL_long_1.raw	1	1	sp|P06727|APOA4_HUMAN
DQEDSDGHLSV	60.29	1200.49	11	1.6	601.253	19.53	15300000	10	F10:8465	WF5_80uL_long_2.raw	16	16	sp|Q14515|SPRL1_HUMAN
VSFLSALEEYTKKLNTQ	60.29	1970.04	17	1.2	986.027	108.38	14800000	12	F12:58436	170303_WF1_3.raw	14	14	sp|P02647|APOA1_HUMAN
NPGSSGTGGTATWKPGSS	60.28	1647.75	18	3.9	824.885	15.88	69100	6	F6:5249	WF3_80uL_long_2.raw	2	2	sp|P02671|FIBA_HUMAN
GVVSLGSPSGEVSHPR	60.28	1563.8	16	2.4	782.909	18.19	29800000	17	F17:6999	170303_WF4_1.raw	9	9	sp|P02765|FETUA_HUMAN
LGKVTIAQGGVLPNIQAV	60.27	1777.05	18	1.6	889.532	89.78	97000	10	F10:47139	WF5_80uL_long_2.raw	3	3	sp|Q6FI13|H2A2A_HUMAN
NLQNNAEWVYQGAI	60.25	1618.77	14	1.9	810.396	101.88	326000	3	F3:68833	WF2_80uL_long_1.raw	5	5	sp|P04114|APOB_HUMAN
IKSYDLDPGAGSLEI	60.23	1576.8	15	2.2	789.408	82.23	4720000	11	F11:52309	170303_WF1_2.raw	10	10	sp|Q13790|APOF_HUMAN
QGLLPVLESFKV	60.23	1328.77	12	3.7	665.395	111.84	12800000	1	F1:56077	WF1_80uL_long_1.raw	15	15	sp|P02647|APOA1_HUMAN
ALAIVEALN(+.98)GKEVAAQ	60.22	1596.87	16	2	799.445	76.74	62300	9	F9:36583	WF5_80uL_long_1.raw	2	2	sp|Q99497|PARK7_HUMAN	Deamidation (NQ)	N9:Deamidation (NQ):79.39
DDVIQTGVDNPGHPF	60.21	1609.74	15	5	805.88	64.86	22800	10	F10:32220	WF5_80uL_long_2.raw	2	2	sp|P06732|KCRM_HUMAN
GGTGGIGGVGGTGGVGN	60.21	1272.61	17	4.5	637.313	26.98	41700	5	F5:10563	WF3_80uL_long_1.raw	2	2	sp|Q13201|MMRN1_HUMAN
AAGSDVDIDM(+15.99)AFILDSAETT	60.2	2056.91	20	1	1029.47	109.2	2780000	15	F15:43734	170303_WF3_1.raw	14	14	sp|P12111|CO6A3_HUMAN	Oxidation (M)	M10:Oxidation (M):1000.00
SPLFM(+15.99)GKVV	60.18	992.536	9	0.9	497.276	35.64	188000000	13	F13:19427	170303_WF2_1.raw	19	18	sp|P01009|A1AT_HUMAN	Oxidation (M)	M5:Oxidation (M):1000.00
TAKDALSSVQES	60.18	1234.6	12	2.4	618.311	15.34	1560000	8	F8:5263	WF4_80uL_long_2.raw	8	8	sp|P02656|APOC3_HUMAN
AISEELDNALNDI	60.18	1415.68	13	1.2	708.847	108.43	228000	6	F6:48209	WF3_80uL_long_2.raw	4	4	sp|P07951|TPM2_HUMAN
VLGAFSDGLAH	60.16	1085.55	11	0.9	543.783	50.06	10600000	11	F11:29797	170303_WF1_2.raw	15	15	sp|P68871|HBB_HUMAN:sp|P02042|HBD_HUMAN
TLEIPGNSDPNM(+15.99)I	60.16	1415.66	13	1.2	708.838	71.17	16700000	4	F4:37334	WF2_80uL_long_2.raw	7	7		Oxidation (M)	M12:Oxidation (M):1000.00
VLKPEEEAPAPEVGASKPEGI	60.14	2146.12	21	1.8	716.38	36.77	4220000	17	F17:15546	170303_WF4_1.raw	7	7	sp|P04004|VTNC_HUMAN
GSKGPLDQLE	60.14	1042.53	10	1	522.273	28.25	120000000	18	F18:11898	170303_WF4_2.raw	17	17	sp|P05546|HEP2_HUMAN
SQFEGSALGKQLNL	60.13	1490.77	14	4.7	746.397	76.48	3580000	1	F1:33267	WF1_80uL_long_1.raw	13	13	sp|P02647|APOA1_HUMAN
TYLPAVDEKL	60.12	1147.61	10	0.9	574.814	57.82	16100000	4	F4:29245	WF2_80uL_long_2.raw	18	18	sp|P02655|APOC2_HUMAN
AM(+15.99)GIMNSFVNDIFERI	60.08	1871.89	16	2.5	936.955	115.99	374000	3	F3:81170	WF2_80uL_long_1.raw	2	2		Oxidation (M)	M2:Oxidation (M):53.53
TALWGKVNVD	60.08	1101.58	10	1.8	551.799	49.67	2650000	16	F16:18937	170303_WF3_2.raw	11	11	sp|P68871|HBB_HUMAN
LGPHAGDVEGHLSF	60.06	1434.69	14	1.5	479.238	45.53	104000000	8	F8:20203	WF4_80uL_long_2.raw	23	23	sp|P06727|APOA4_HUMAN
SFDPDDVITDIEM(+15.99)	60.06	1511.63	13	2.3	756.826	109.84	637000	9	F9:55417	WF5_80uL_long_1.raw	3	3	sp|P14317|HCLS1_HUMAN	Oxidation (M)	M13:Oxidation (M):1000.00
VEGDLKGPEVDI	60.05	1269.65	12	2.5	635.831	48.96	11600000	9	F9:23169	WF5_80uL_long_1.raw	15	15	sp|Q09666|AHNK_HUMAN
TIAGGGVIPH	60.04	920.508	10	0.6	461.262	21.62	113000000	20	F20:9220	170303_WF5_2.raw	17	17	sp|P0C0S5|H2AZ_HUMAN:sp|Q71UI9|H2AV_HUMAN
ELVAKPSVSVEFV	60.03	1402.77	13	2.2	702.394	78.47	1220000	3	F3:51449	WF2_80uL_long_1.raw	1	1	sp|P04114|APOB_HUMAN
N(+.98)HQLEGLTFQM(+15.99)	60.03	1333.6	11	0.8	667.807	60.83	11900000	18	F18:24280	170303_WF4_2.raw	8	8	sp|P06727|APOA4_HUMAN	Deamidation (NQ); Oxidation (M)	N1:Deamidation (NQ):8.22;M11:Oxidation (M):1000.00
KGQTLLAVAKSQ	59.99	1242.73	12	-1.9	622.371	13.67	5410000	12	F12:4559	170303_WF1_3.raw	18	18	sp|P02750|A2GL_HUMAN
SLLSFM(+15.99)QGYM(+15.99)	59.98	1207.53	10	1.6	604.771	87.88	68200000	5	F5:37361	WF3_80uL_long_1.raw	19	19	sp|P02656|APOC3_HUMAN	Oxidation (M)	M6:Oxidation (M):1000.00;M10:Oxidation (M):1000.00
WDLDPEVRPT	59.98	1226.59	10	2.3	614.305	61.24	20200000	9	F9:29119	WF5_80uL_long_1.raw	16	16	sp|P02656|APOC3_HUMAN
GEYGAEALER	59.97	1093.5	10	3.2	547.761	19.05	56700000	9	F9:8272	WF5_80uL_long_1.raw	13	13	sp|P69905|HBA_HUMAN
NAVAHVDDM(+15.99)PNAL	59.97	1381.63	13	0.2	691.822	23.21	932000	16	F16:9259	170303_WF3_2.raw	3	3	sp|P69905|HBA_HUMAN	Oxidation (M)	M9:Oxidation (M):1000.00
TPLQLFEGR	59.94	1059.57	9	1.2	530.794	62.66	10300000	4	F4:32037	WF2_80uL_long_2.raw	14	14
QASEGPLKGILGY	59.93	1331.71	13	0.9	666.862	87.52	1110000	1	F1:39960	WF1_80uL_long_1.raw	5	5	sp|P04406|G3P_HUMAN
RFYEGPELVADSNV	59.89	1594.76	14	-2.4	798.387	68.39	508000	8	F8:30779	WF4_80uL_long_2.raw	3	3	sp|P49747|COMP_HUMAN
FDLSHGSAQ	59.87	960.43	9	1.4	481.223	20.51	10000000	1	F1:5118	WF1_80uL_long_1.raw	14	14	sp|P69905|HBA_HUMAN
TATESFASDPILYRPV	59.87	1765.89	16	4.3	883.955	84.02	81300	13	F13:49093	170303_WF2_1.raw	4	4	sp|P14618|KPYM_HUMAN
TRQTHQPPAPNSLI	59.86	1558.82	14	0.6	780.418	17.35	227000000	13	F13:7949	170303_WF2_1.raw	22	22	sp|P02747|C1QC_HUMAN
LSALEEYTKKLNTQ	59.84	1636.87	14	-2.1	819.439	46.13	16600000	11	F11:27290	170303_WF1_2.raw	15	15	sp|P02647|APOA1_HUMAN
ATGPPVSELITKAV	59.81	1381.78	14	-0.3	691.898	75.34	2910000	14	F14:35147	170303_WF2_2.raw	10	10	sp|P16401|H15_HUMAN
AAVPSGASTGIYEALE	59.79	1534.75	16	3.2	768.385	85.56	675000	9	F9:41413	WF5_80uL_long_1.raw	10	10	sp|P06733|ENOA_HUMAN:sp|P13929|ENOB_HUMAN
LEKDLRDKVNSFF	59.78	1609.85	13	2.3	805.932	58.57	30200000	16	F16:22190	170303_WF3_2.raw	10	10	sp|P06727|APOA4_HUMAN
TQRFFESFGDLSTPDAV	59.78	1915.9	17	0	958.955	102.99	2320000	19	F19:51368	170303_WF5_1.raw	9	9	sp|P68871|HBB_HUMAN
M(+15.99)GVVSLGSPSGEVSHPR	59.77	1710.84	17	2.6	856.428	19.68	46300000	8	F8:7959	WF4_80uL_long_2.raw	11	11	sp|P02765|FETUA_HUMAN	Oxidation (M)	M1:Oxidation (M):1000.00
YEDFVEGLR	59.76	1126.53	9	2.3	564.273	55.63	223000	4	F4:27626	WF2_80uL_long_2.raw	3	3	sp|P08590|MYL3_HUMAN:sp|P05976|MYL1_HUMAN
LLM(+15.99)EPTDDGNTTPR	59.76	1574.72	14	1.9	788.371	19.45	117000	5	F5:6870	WF3_80uL_long_1.raw	3	3	sp|Q14515|SPRL1_HUMAN	Oxidation (M)	M3:Oxidation (M):1000.00
SDQVPDTESET	59.75	1206.49	11	3.5	604.254	16.13	645000	1	F1:3792	WF1_80uL_long_1.raw	4	4	sp|P01024|CO3_HUMAN
RLDYQEGPPGVEI	59.74	1471.73	13	-3	736.87	61.48	1630000	10	F10:30282	WF5_80uL_long_2.raw	8	8	sp|Q14624|ITIH4_HUMAN
TATESFASDPILYRPVAV	59.73	1935.99	18	0.7	969.005	95.95	6210000	14	F14:46230	170303_WF2_2.raw	16	16	sp|P14618|KPYM_HUMAN
GLTTEEEFVEGIY	59.7	1485.69	13	2.4	743.853	107.38	1240000	7	F7:52896	WF4_80uL_long_1.raw	9	9	sp|P02766|TTHY_HUMAN
APLAEDVRGNL	59.69	1153.61	11	2.7	577.813	34.12	1970000	16	F16:13339	170303_WF3_2.raw	8	8	sp|P06727|APOA4_HUMAN
TKVFSN(+.98)GADLSGV	59.67	1294.64	13	3.1	648.33	53.26	736000	14	F14:24605	170303_WF2_2.raw	7	7	sp|P01009|A1AT_HUMAN	Deamidation (NQ)	N6:Deamidation (NQ):1000.00
GIGTLDGFR	59.67	934.487	9	1	468.251	42.22	39500000	13	F13:23231	170303_WF2_1.raw	26	26	sp|P02671|FIBA_HUMAN
SRQLGLPGPPDVPDHAAYHPF	59.66	2270.12	21	3.6	757.718	65.93	78400000	7	F7:32270	WF4_80uL_long_1.raw	10	10	sp|Q14624|ITIH4_HUMAN
SVDTDAPDLDIEGPEGKL	59.66	1869.88	18	3.4	935.953	83.06	904000	3	F3:55067	WF2_80uL_long_1.raw	9	9	sp|Q09666|AHNK_HUMAN
REQLGPVTQEF	59.65	1302.66	11	3.3	652.338	43.74	5200000	20	F20:19844	170303_WF5_2.raw	4	4	sp|P02647|APOA1_HUMAN
DLGTLSGIGTLD	59.64	1160.59	12	3.7	581.306	106.72	3460000	16	F16:41704	170303_WF3_2.raw	2	2	sp|P02671|FIBA_HUMAN
HLEINPDHSII	59.63	1286.66	11	0.8	644.339	39.65	1390000	14	F14:18610	170303_WF2_2.raw	6	6
STYTGIFTDQVLSVLKGEE	59.62	2086.05	19	3.3	1044.03	113.4	2600000	17	F17:47729	170303_WF4_1.raw	19	19	sp|P02655|APOC2_HUMAN
RQLGLPGPPDVPDHA	59.61	1567.81	15	0.9	523.611	42.81	10500000	16	F16:16618	170303_WF3_2.raw	8	8	sp|Q14624|ITIH4_HUMAN
SVLGQLGITK	59.61	1014.61	10	1.1	508.312	56.11	20600000	9	F9:26633	WF5_80uL_long_1.raw	20	20	sp|P01009|A1AT_HUMAN
AQGGVLPNIQAV	59.61	1165.65	12	0.9	583.831	80.51	27700000	4	F4:43093	WF2_80uL_long_2.raw	13	13	sp|Q6FI13|H2A2A_HUMAN
GSESGIFTNTKES	59.6	1355.62	13	2.3	678.819	18.3	6810000	18	F18:7039	170303_WF4_2.raw	7	7	sp|P02671|FIBA_HUMAN
NAPDVDVQGPDWHL	59.6	1561.72	14	1.9	781.867	82.79	2280000	9	F9:40172	WF5_80uL_long_1.raw	9	9	sp|Q09666|AHNK_HUMAN
FEIPINGLSEF	59.6	1264.63	11	-2.8	633.322	113.81	75700	7	F7:57230	WF4_80uL_long_1.raw	1	1	sp|P19823|ITIH2_HUMAN
QGTQVYVFLTKGGYTLV	59.59	1873	17	2.6	937.509	106.71	4650000	1	F1:51733	WF1_80uL_long_1.raw	13	13	sp|P02790|HEMO_HUMAN
IEFTPEQIEEF	59.58	1380.64	11	0.3	691.33	108.2	616000	6	F6:48044	WF3_80uL_long_2.raw	6	6	sp|P08590|MYL3_HUMAN
DALTNAVAHV	59.56	1009.52	10	0.3	505.767	56.34	1860000	16	F16:21352	170303_WF3_2.raw	7	7	sp|P69905|HBA_HUMAN
SQTSSSSFQYM(+15.99)YLL	59.53	1656.73	14	0.5	829.375	104.41	464000	3	F3:70946	WF2_80uL_long_1.raw	6	6	sp|P02675|FIBB_HUMAN	Oxidation (M)	M11:Oxidation (M):1000.00
IYDFIEDQGGLEAV	59.52	1567.74	14	1.6	784.879	109.37	996000	3	F3:75449	WF2_80uL_long_1.raw	6	6	sp|P42768|WASP_HUMAN
LVALIPEPSAQQL	59.5	1377.79	13	3.6	689.903	104.62	1710000	4	F4:58468	WF2_80uL_long_2.raw	8	8	sp|P04114|APOB_HUMAN
ALAAAGYDVEKN	59.49	1220.6	12	0.5	611.309	19.82	138000	6	F6:7509	WF3_80uL_long_2.raw	3	3	sp|P16403|H12_HUMAN:sp|P10412|H14_HUMAN:sp|P16402|H13_HUMAN
SWNSGALTSGVHTFPA	59.49	1630.77	16	1.9	816.396	80.22	11500000	1	F1:35503	WF1_80uL_long_1.raw	14	14	sp|P0DOX5|IGG1_HUMAN
DTASTGKTFPGFFSPM(+15.99)L	59.47	1818.85	17	2.4	910.434	106.19	95700000	6	F6:46758	WF3_80uL_long_2.raw	19	19	sp|P02671|FIBA_HUMAN	Oxidation (M)	M16:Oxidation (M):1000.00
FGHGAEDSLADQA	59.46	1316.56	13	1.6	659.29	21.33	12700000	10	F10:9542	WF5_80uL_long_2.raw	12	12	sp|P0DJI8|SAA1_HUMAN
QFTSSTSYN(+.98)RGDSTF	59.46	1697.72	15	-0.2	849.865	37.82	261000	6	F6:15825	WF3_80uL_long_2.raw	5	5	sp|P02671|FIBA_HUMAN	Deamidation (NQ)	N9:Deamidation (NQ):101.72
TPYADEFKVKI	59.44	1309.69	11	2.2	655.855	52.06	19900000	16	F16:19803	170303_WF3_2.raw	13	13	sp|P06727|APOA4_HUMAN
LLEPGM(+15.99)ELGITAALT	59.44	1543.82	15	4.6	772.919	108.1	5010000	7	F7:53463	WF4_80uL_long_1.raw	14	14	sp|O14791|APOL1_HUMAN	Oxidation (M)	M6:Oxidation (M):1000.00
LESFKVSFLSALEEYT	59.44	1861.93	16	3.9	931.978	114.21	2480000	5	F5:50846	WF3_80uL_long_1.raw	9	9	sp|P02647|APOA1_HUMAN
DTASTGKTFPGFFSPM(+15.99)LG	59.41	1875.87	18	0.3	938.943	104.01	1560000	4	F4:57995	WF2_80uL_long_2.raw	9	9	sp|P02671|FIBA_HUMAN	Oxidation (M)	M16:Oxidation (M):1000.00
VGAHAGEYGAEALE	59.4	1372.63	14	1.8	687.321	31.76	134000000	1	F1:10724	WF1_80uL_long_1.raw	14	14	sp|P69905|HBA_HUMAN
VEEDDDDELDSKL	59.39	1520.64	13	4.3	761.329	38.09	1130000	9	F9:18182	WF5_80uL_long_1.raw	4	4	sp|P52566|GDIR2_HUMAN
AGEYGAEALERM(+15.99)	59.38	1311.58	12	-1.5	656.794	23.62	631000	10	F10:10814	WF5_80uL_long_2.raw	7	7	sp|P69905|HBA_HUMAN	Oxidation (M)	M12:Oxidation (M):1000.00
GLVEKVQAAVGT	59.38	1170.66	12	2.1	586.339	51	440000	7	F7:23804	WF4_80uL_long_1.raw	2	2	sp|P02649|APOE_HUMAN
KGHGKKVADALTNAV	59.34	1507.85	15	1.2	754.932	12.47	221000	11	F11:4030	170303_WF1_2.raw	2	2	sp|P69905|HBA_HUMAN
SITGTYDLKSV	59.33	1182.61	11	2.5	592.315	42.64	254000	10	F10:20428	WF5_80uL_long_2.raw	2	2	sp|P01009|A1AT_HUMAN
NWRDPDQTDGLGL	59.32	1485.68	13	-2.2	743.848	67.53	33000	9	F9:32085	WF5_80uL_long_1.raw	1	1	sp|P06396|GELS_HUMAN
VLDPEGDAQIDPNWV	59.31	1666.78	15	3.1	834.402	105	374000	6	F6:45755	WF3_80uL_long_2.raw	4	4	sp|P49747|COMP_HUMAN
VLDAVRGSPAINVAVHVF	59.3	1863.04	18	2.4	622.021	92.2	3440000	18	F18:35680	170303_WF4_2.raw	3	3	sp|P02766|TTHY_HUMAN
LVVYPWTQRFFESF	59.3	1817.91	14	2.3	606.98	114.2	3540000	10	F10:64542	WF5_80uL_long_2.raw	8	8	sp|P68871|HBB_HUMAN:sp|P02042|HBD_HUMAN
GGHLDQQVEEF	59.3	1257.56	11	2.6	629.79	33.26	459000000	5	F5:13835	WF3_80uL_long_1.raw	11	11	sp|P06727|APOA4_HUMAN
VEVVDEERYDI	59.29	1364.65	11	0.3	683.33	51.05	28800	9	F9:23984	WF5_80uL_long_1.raw	1	1	sp|P19237|TNNI1_HUMAN
DLGTLSGIGTL	59.28	1045.57	11	0.7	523.79	109.27	8230000	16	F16:43441	170303_WF3_2.raw	19	19	sp|P02671|FIBA_HUMAN
SGLM(+15.99)VATKYEV	59.27	1212.61	11	3	607.312	46.61	39700000	1	F1:17696	WF1_80uL_long_1.raw	14	14	sp|P02751|FINC_HUMAN	Oxidation (M)	M4:Oxidation (M):1000.00
IEGEM(+15.99)QVPDVDIR	59.26	1515.72	13	2.5	758.871	43.69	2390000	3	F3:26331	WF2_80uL_long_1.raw	10	10	sp|Q09666|AHNK_HUMAN	Oxidation (M)	M5:Oxidation (M):1000.00
KATGPPVSELITK	59.25	1339.77	13	0.8	447.598	20.4	8460000	13	F13:9937	170303_WF2_1.raw	7	7	sp|P16401|H15_HUMAN
DGDFNSYVR	59.22	1071.46	9	0	536.738	30.12	3490000	13	F13:16028	170303_WF2_1.raw	3	3
TNWDDM(+15.99)EKI	59.21	1166.49	9	0.7	584.253	29.02	31500000	4	F4:13449	WF2_80uL_long_2.raw	8	8	sp|P60709|ACTB_HUMAN:sp|P63261|ACTG_HUMAN:sp|P68032|ACTC_HUMAN:sp|P68133|ACTS_HUMAN	Oxidation (M)	M6:Oxidation (M):1000.00
DSLQASLRPHA	59.19	1193.62	11	1.7	597.816	18.53	10500000	8	F8:7344	WF4_80uL_long_2.raw	5	5	sp|P06727|APOA4_HUMAN
GENFNKALVQQM(+15.99)EQ	59.18	1650.77	14	4.6	826.395	23.22	33900	7	F7:10202	WF4_80uL_long_1.raw	2	2	sp|P06727|APOA4_HUMAN	Oxidation (M)	M12:Oxidation (M):1000.00
SIYVYKVLKQVHPDTGISSK	59.18	2261.24	20	1.9	754.756	44.6	3010000	14	F14:20928	170303_WF2_2.raw	4	4
LVNFLSYFVELGTQPATQ	59.18	2026.04	18	-0.2	676.354	117.8	463000	1	F1:60993	WF1_80uL_long_1.raw	4	4	sp|P02652|APOA2_HUMAN
GLLPVLESF	59.18	973.548	9	0.2	487.782	115.55	13000000	14	F14:59955	170303_WF2_2.raw	20	20	sp|P02647|APOA1_HUMAN
LEVDETYVPK	59.17	1191.6	10	2.5	596.81	36.6	350000	9	F9:17530	WF5_80uL_long_1.raw	5	5	sp|P02768|ALBU_HUMAN
EYGAEALERM(+15.99)FL	59.16	1443.67	12	4	722.845	100.99	3100000	7	F7:48537	WF4_80uL_long_1.raw	14	14	sp|P69905|HBA_HUMAN	Oxidation (M)	M10:Oxidation (M):1000.00
AQFVNWIDSIIQ(+.98)R	59.16	1589.82	13	1.2	795.918	113.37	343000	3	F3:78975	WF2_80uL_long_1.raw	7	7	sp|P08246|ELNE_HUMAN	Deamidation (NQ)	Q12:Deamidation (NQ):142.27
SEGPLKGILGYTEH	59.16	1499.76	14	0.6	750.889	58.8	28300000	12	F12:28587	170303_WF1_3.raw	18	18	sp|P04406|G3P_HUMAN
NSPLDEENLTQE	59.16	1387.61	12	3.6	694.815	51.18	5110000	10	F10:24456	WF5_80uL_long_2.raw	18	18	sp|P01011|AACT_HUMAN
FSDSSESDTHPF	59.14	1354.53	12	-0.3	678.273	27.54	139000	4	F4:12556	WF2_80uL_long_2.raw	3	3	sp|P13611|CSPG2_HUMAN
KVKIDQTVEEL	59.14	1300.72	11	2.9	651.371	26.14	14600000	7	F7:12055	WF4_80uL_long_1.raw	9	9	sp|P06727|APOA4_HUMAN
HAVSEGTKAVTKYTSS	59.14	1664.84	16	0.6	555.953	11.64	4290000	14	F14:3200	170303_WF2_2.raw	10	10
AVLTIDEKGTEAAG	59.13	1373.7	14	1.2	687.86	26.61	1450000	16	F16:10607	170303_WF3_2.raw	9	9	sp|P01009|A1AT_HUMAN
SDFEIGHFF	59.13	1097.48	9	2.6	549.75	103.23	677000	10	F10:55545	WF5_80uL_long_2.raw	5	5	sp|Q99733|NP1L4_HUMAN
NHQLEGLTFQ(+.98)M(+15.99)	59.12	1333.6	11	2.2	667.807	50.48	1240000	8	F8:22250	WF4_80uL_long_2.raw	6	6	sp|P06727|APOA4_HUMAN	Deamidation (NQ); Oxidation (M)	Q10:Deamidation (NQ):166.82;M11:Oxidation (M):1000.00
AVGKVIPELN(+.98)GKLT	59.11	1438.84	14	-0.2	720.427	45.5	136000000	13	F13:25051	170303_WF2_1.raw	31	31	sp|P04406|G3P_HUMAN	Deamidation (NQ)	N10:Deamidation (NQ):1000.00
SSSHHPGIAEFPSRG	59.11	1564.74	15	1.3	783.377	12.33	138000000	18	F18:3328	170303_WF4_2.raw	29	29	sp|P02671|FIBA_HUMAN
SLDKFLASVSTVL	59.11	1378.77	13	1.7	690.394	112.07	22700000	2	F2:58617	WF1_80uL_long_2.raw	15	15	sp|P69905|HBA_HUMAN
PGPPDVPDH	59.09	929.424	9	0.8	465.72	16.12	189000	1	F1:3788	WF1_80uL_long_1.raw	2	2	sp|Q14624|ITIH4_HUMAN
LLVVDRETDEFF	59.08	1481.74	12	1.5	741.878	100.05	2750000	4	F4:55190	WF2_80uL_long_2.raw	10	10	sp|O14745|NHRF1_HUMAN
LVSQYFQTVTDYGK	59.08	1647.81	14	4.3	824.918	78.31	91000	19	F19:36685	170303_WF5_1.raw	3	3	sp|P02652|APOA2_HUMAN
AYKSELEEQLTPV	59.06	1505.76	13	1.2	753.889	53.47	3090000	9	F9:25227	WF5_80uL_long_1.raw	11	11	sp|P02649|APOE_HUMAN
ASVSTVLTSKY	59.04	1154.62	11	0.2	578.317	36.33	7040000	12	F12:17371	170303_WF1_3.raw	14	14	sp|P69905|HBA_HUMAN
DFDDFNLEDAV	59.04	1298.53	11	3.8	650.275	114.6	268000	3	F3:79971	WF2_80uL_long_1.raw	5	5	sp|Q8TCZ2|C99L2_HUMAN
FKDLGEENF	59.02	1097.5	9	1.4	549.76	42.11	62800000	19	F19:19459	170303_WF5_1.raw	19	19	sp|P02768|ALBU_HUMAN
AQGGVLPNIQAVLLPK	58.99	1616.96	16	2.2	809.49	103.67	8750000	9	F9:50423	WF5_80uL_long_1.raw	15	15	sp|Q6FI13|H2A2A_HUMAN
SSHHPGIAEFPSR	58.99	1420.68	13	0.4	474.569	12.47	2280000	16	F16:3462	170303_WF3_2.raw	10	10	sp|P02671|FIBA_HUMAN
AFSDYIHPV	58.98	1047.5	9	-0.3	524.758	64.58	8830000	17	F17:26035	170303_WF4_1.raw	18	18	sp|P00734|THRB_HUMAN
TTIPTIGFNVETV	58.98	1390.73	13	-0.5	696.374	108.48	927000	2	F2:55556	WF1_80uL_long_2.raw	8	8	sp|P84077|ARF1_HUMAN:sp|P18085|ARF4_HUMAN:sp|P61204|ARF3_HUMAN:sp|P84085|ARF5_HUMAN
ILDLTQNTYQHF	58.96	1491.74	12	3.3	746.878	78.13	2570000	4	F4:41396	WF2_80uL_long_2.raw	8	8	sp|Q06033|ITIH3_HUMAN
NSFFSTFKEKESQD	58.91	1692.76	14	2	847.39	39.97	1010000	16	F16:15568	170303_WF3_2.raw	3	3	sp|P06727|APOA4_HUMAN
FDTASTGKTFPGFFS	58.91	1608.75	15	1.1	805.381	95.86	241000	3	F3:64301	WF2_80uL_long_1.raw	2	2	sp|P02671|FIBA_HUMAN
TVTDYGKDLM(+15.99)EKV	58.9	1513.73	13	1.5	757.875	36.98	4000000	15	F15:14382	170303_WF3_1.raw	15	15	sp|P02652|APOA2_HUMAN	Oxidation (M)	M10:Oxidation (M):1000.00
GFYESDVM(+15.99)GR	58.89	1175.49	10	2.5	588.755	20.44	3780000	3	F3:9272	WF2_80uL_long_1.raw	13	13	sp|P01023|A2MG_HUMAN	Oxidation (M)	M8:Oxidation (M):1000.00
M(+15.99)FLSFPTTKT	58.88	1187.59	10	0.6	594.802	59.22	14500000	11	F11:36572	170303_WF1_2.raw	13	13	sp|P69905|HBA_HUMAN	Oxidation (M)	M1:Oxidation (M):1000.00
SIEDPFDQDDWGAWQKF	58.87	2082.9	17	-2.8	1042.45	112.99	835000	9	F9:57955	WF5_80uL_long_1.raw	7	7	sp|P06733|ENOA_HUMAN
SLTSDLQAQS	58.87	1048.5	10	1.6	525.26	35.78	9210000	5	F5:14363	WF3_80uL_long_1.raw	12	12	sp|P04004|VTNC_HUMAN
YKVLKQVHPDTGISSK	58.85	1798.99	16	-0.6	900.504	12.13	25600000	11	F11:3689	170303_WF1_2.raw	16	16
FFELEADEREPTE	58.83	1610.71	13	2.8	806.365	63.11	10400	9	F9:29965	WF5_80uL_long_1.raw	1	1	sp|P01019|ANGT_HUMAN
FDTASTGKTFPGFFSPM(+15.99)LGEFV	58.82	2398.12	22	-1.6	1200.06	112.9	272000000	19	F19:59138	170303_WF5_1.raw	22	22	sp|P02671|FIBA_HUMAN	Oxidation (M)	M17:Oxidation (M):1000.00
TWLNPDPSQKQN	58.82	1426.68	12	5	714.353	30.96	417000	3	F3:17254	WF2_80uL_long_1.raw	4	4	sp|P10451|OSTP_HUMAN
QLYNKYPDAV	58.81	1209.6	10	1	605.809	36.44	15200000	1	F1:12595	WF1_80uL_long_1.raw	11	11	sp|P10451|OSTP_HUMAN
HQLEGLTFQM(+15.99)	58.81	1218.57	10	1.5	610.293	43.76	2330000	8	F8:19242	WF4_80uL_long_2.raw	8	8	sp|P06727|APOA4_HUMAN	Oxidation (M)	M10:Oxidation (M):1000.00
GDVEGHLSF	58.81	959.435	9	1.2	480.725	37.7	188000000	5	F5:15880	WF3_80uL_long_1.raw	18	18	sp|P06727|APOA4_HUMAN
M(+15.99)IEQNTKSPLFM(+15.99)GKVV	58.79	1852.94	16	0.8	618.655	33.68	17700000	9	F9:16463	WF5_80uL_long_1.raw	8	8	sp|P01009|A1AT_HUMAN	Oxidation (M)	M1:Oxidation (M):1000.00;M12:Oxidation (M):1000.00
FDTASTGKTFPGFFSPM(+15.99)LGE	58.79	2151.98	20	0.3	1077	105.3	27200000	13	F13:64286	170303_WF2_1.raw	13	13	sp|P02671|FIBA_HUMAN	Oxidation (M)	M17:Oxidation (M):1000.00
ALAIVEALN(+.98)GKEVA	58.77	1397.78	14	3	699.898	77.37	524000	9	F9:36924	WF5_80uL_long_1.raw	4	4	sp|Q99497|PARK7_HUMAN	Deamidation (NQ)	N9:Deamidation (NQ):1000.00
NEQEQPLGQWHLS	58.77	1564.73	13	2.9	783.373	63.42	14500000	5	F5:26524	WF3_80uL_long_1.raw	14	14	sp|O00391|QSOX1_HUMAN
GVDNPGHPF	58.76	938.425	9	3.1	470.221	19.16	38500000	4	F4:7626	WF2_80uL_long_2.raw	16	16	sp|P06732|KCRM_HUMAN
GADLSGVTEEAPLKLS	58.75	1585.82	16	1.1	793.918	73.58	1910000	15	F15:27694	170303_WF3_1.raw	6	6	sp|P01009|A1AT_HUMAN
ALSDLHAHKL	58.74	1103.61	10	0.8	552.812	12.26	241000	16	F16:3304	170303_WF3_2.raw	3	3	sp|P69905|HBA_HUMAN
M(+15.99)LGEFVSETESRGSESGIF	58.73	2076.93	19	3.6	1039.48	90.98	3050000	8	F8:40946	WF4_80uL_long_2.raw	7	7	sp|P02671|FIBA_HUMAN	Oxidation (M)	M1:Oxidation (M):1000.00
SGGTTM(+15.99)YPGIADR	58.67	1340.6	13	3.7	671.311	18.29	8480	16	F16:6929	170303_WF3_2.raw	2	2	sp|P60709|ACTB_HUMAN:sp|P63261|ACTG_HUMAN:sp|P68032|ACTC_HUMAN:sp|P68133|ACTS_HUMAN	Oxidation (M)	M6:Oxidation (M):1000.00
YLPAVDEKL	58.67	1046.56	9	0.8	524.29	44.27	84300000	13	F13:24357	170303_WF2_1.raw	20	20	sp|P02655|APOC2_HUMAN
VLTGWRPGSGFTNTM(+15.99)	58.65	1638.78	15	-4.2	820.395	63.59	513000	4	F4:32448	WF2_80uL_long_2.raw	8	8	sp|P14618|KPYM_HUMAN	Oxidation (M)	M15:Oxidation (M):1000.00
DEFKVKIDQTVEELR	58.64	1847.96	15	-0.7	924.988	67.03	5370000	11	F11:41629	170303_WF1_2.raw	4	4	sp|P06727|APOA4_HUMAN
LENVIRDAVTY	58.63	1291.68	11	2	646.847	59.75	2290000	19	F19:27351	170303_WF5_1.raw	9	9	sp|P62805|H4_HUMAN
FLSALEEYT	58.62	1071.51	9	1.2	536.764	97.86	113000000	4	F4:53718	WF2_80uL_long_2.raw	16	16	sp|P02647|APOA1_HUMAN
NSIFSGFLLFPDM(+15.99)EA	58.62	1702.79	15	-0.5	852.403	117.69	2620000	1	F1:60881	WF1_80uL_long_1.raw	7	7	sp|P02746|C1QB_HUMAN	Oxidation (M)	M13:Oxidation (M):1000.00
VLGAFSDGLAHL	58.6	1198.63	12	1.5	600.325	90.55	4100000	19	F19:43889	170303_WF5_1.raw	13	13	sp|P68871|HBB_HUMAN:sp|P02042|HBD_HUMAN
VQHELDEAEERA	58.59	1424.65	12	0.7	713.334	13.14	53200	16	F16:3980	170303_WF3_2.raw	3	3	sp|P12883|MYH7_HUMAN
LVVYPWTQRFFE	58.58	1583.81	12	4.8	792.918	107.52	139000	9	F9:53556	WF5_80uL_long_1.raw	5	5	sp|P68871|HBB_HUMAN:sp|P02042|HBD_HUMAN
IDQNVEELKGRLTPY	58.58	1773.93	15	-0.4	887.97	56.08	6510000	8	F8:24788	WF4_80uL_long_2.raw	7	7	sp|P06727|APOA4_HUMAN
GSESGIFTNTK	58.56	1139.55	11	1.8	570.781	17.12	1520000	4	F4:6093	WF2_80uL_long_2.raw	5	5	sp|P02671|FIBA_HUMAN
TGKTFPGFFSPM(+15.99)LGEF	58.56	1777.84	16	-4.3	889.923	107.79	271000	15	F15:42806	170303_WF3_1.raw	4	4	sp|P02671|FIBA_HUMAN	Oxidation (M)	M12:Oxidation (M):1000.00
TVTAEGKGQGTLSVV	58.54	1445.77	15	-1.1	723.893	25.08	4400000	9	F9:11779	WF5_80uL_long_1.raw	13	13	sp|P01024|CO3_HUMAN
LDEVKEQVAEVR	58.54	1413.75	12	2.2	707.882	16.48	752000	8	F8:6011	WF4_80uL_long_2.raw	6	6	sp|P02649|APOE_HUMAN
LM(+15.99)IEQNTKSPLFM(+15.99)GKVVNPTQ	58.52	2406.23	21	0.7	803.084	53.31	179000000	16	F16:20487	170303_WF3_2.raw	11	11	sp|P01009|A1AT_HUMAN	Oxidation (M)	M2:Oxidation (M):1000.00;M13:Oxidation (M):1000.00
SLDKFLASVS	58.48	1065.57	10	2.2	533.794	72.69	3150000	5	F5:30298	WF3_80uL_long_1.raw	7	7	sp|P69905|HBA_HUMAN
DSHSLTTNIM(+15.99)EI	58.48	1375.63	12	3.9	688.824	55.62	16100000	16	F16:21186	170303_WF3_2.raw	12	12	sp|P02671|FIBA_HUMAN	Oxidation (M)	M10:Oxidation (M):1000.00
FLGEAFDGARDM(+15.99)W	58.48	1529.66	13	2.1	765.839	91.91	25500	6	F6:38975	WF3_80uL_long_2.raw	1	1	sp|P0DJI8|SAA1_HUMAN:sp|P0DJI9|SAA2_HUMAN	Oxidation (M)	M12:Oxidation (M):1000.00
AVPSGASTGIYEALEL	58.47	1576.8	16	2.1	789.408	108.45	1790000	6	F6:48223	WF3_80uL_long_2.raw	8	8	sp|P06733|ENOA_HUMAN:sp|P13929|ENOB_HUMAN
TFEYPSNAVEEVTQNNFR	58.47	2143.98	18	1.2	715.668	91.59	4520000	5	F5:38426	WF3_80uL_long_1.raw	9	9	sp|Q14624|ITIH4_HUMAN
GLPGPPDV	58.46	750.391	8	0.9	376.203	51.21	989000	4	F4:25224	WF2_80uL_long_2.raw	2	2	sp|Q14624|ITIH4_HUMAN
QGLLPVLESF	58.46	1101.61	10	1	551.811	115.86	21700000	19	F19:61335	170303_WF5_1.raw	21	21	sp|P02647|APOA1_HUMAN
IQELDKDDESL	58.46	1303.61	11	0.5	652.815	29.83	457000	16	F16:11792	170303_WF3_2.raw	5	5	sp|P52565|GDIR1_HUMAN
WVEQEGPEYWDRETQ	58.45	1950.84	15	2.7	976.429	65.16	83800	6	F6:27621	WF3_80uL_long_2.raw	4	4
N(+.98)YKPEEEYPDLS	58.45	1483.64	12	1.8	742.826	48.98	3490000	9	F9:23070	WF5_80uL_long_1.raw	12	12	sp|P06732|KCRM_HUMAN	Deamidation (NQ)	N1:Deamidation (NQ):1000.00
KATGPPVSELI	58.44	1110.63	11	1	556.322	43.93	247000000	16	F16:17089	170303_WF3_2.raw	19	19	sp|P16401|H15_HUMAN
SEQVQEELLSSQVTQELR	58.42	2102.05	18	-3.1	1052.03	85.68	1480000	4	F4:46036	WF2_80uL_long_2.raw	8	8	sp|P02649|APOE_HUMAN
SQFTLPKSVSDGI	58.4	1377.71	13	2.3	689.866	78.29	9200000	1	F1:34325	WF1_80uL_long_1.raw	11	11	sp|P04114|APOB_HUMAN
TGKTFPGFFSP	58.37	1184.59	11	1	593.301	74.71	25200000	11	F11:47539	170303_WF1_2.raw	8	8	sp|P02671|FIBA_HUMAN
NALWHTGDTESQV	58.37	1456.66	13	-3.2	729.334	36.77	31500	9	F9:17566	WF5_80uL_long_1.raw	3	3	sp|P49747|COMP_HUMAN
ITENDIQIALDDAKI	58.35	1670.87	15	-2.6	836.441	106.06	436000	13	F13:64909	170303_WF2_1.raw	4	4	sp|P04114|APOB_HUMAN
TTDDLTEAWLQEKL	58.35	1661.81	14	-1.7	831.913	104.07	611000	4	F4:58010	WF2_80uL_long_2.raw	5	5	sp|O60234|GMFG_HUMAN
SLDLDSIIAEVK	58.34	1301.71	12	1.3	651.862	107.32	63500	7	F7:52862	WF4_80uL_long_1.raw	3	3	sp|P04264|K2C1_HUMAN
WLAVNDYYDM(+15.99)V	58.34	1403.61	11	-0.5	702.81	105.23	1020000	8	F8:48266	WF4_80uL_long_2.raw	9	9	sp|P02747|C1QC_HUMAN	Oxidation (M)	M10:Oxidation (M):1000.00
NAAEDDLPTVEL	58.33	1285.6	12	2.2	643.811	94.03	458000	5	F5:39332	WF3_80uL_long_1.raw	3	3	sp|P00488|F13A_HUMAN
IIGGSSSLPGSHPWLA	58.33	1577.82	16	2.2	789.919	73.82	1290000	11	F11:46313	170303_WF1_2.raw	6	6	sp|Q04756|HGFA_HUMAN
SIPVKSDIAPVARLLI	58.32	1691.03	16	4.9	846.529	91.18	3150000	11	F11:58739	170303_WF1_2.raw	5	5	sp|P01023|A2MG_HUMAN
FVNDIFERI	58.31	1151.6	9	0.4	576.806	92.67	95700000	13	F13:55277	170303_WF2_1.raw	17	17
YM(+15.99)AAVLEYLTAEILEL	58.31	1856.95	16	-0.3	929.481	118.02	72800	1	F1:61198	WF1_80uL_long_1.raw	2	2	sp|Q6FI13|H2A2A_HUMAN:sp|O75367|H2AY_HUMAN	Oxidation (M)	M2:Oxidation (M):1000.00
AAVPSGASTGIYEAL	58.28	1405.71	15	2.2	703.863	83.53	587000	3	F3:55336	WF2_80uL_long_1.raw	3	3	sp|P06733|ENOA_HUMAN:sp|P13929|ENOB_HUMAN
PGPPDVPDHAAYHPF	58.27	1615.74	15	-1.6	808.877	43.37	23700000	16	F16:16649	170303_WF3_2.raw	10	10	sp|Q14624|ITIH4_HUMAN
KVPGLYYFT	58.25	1086.58	9	3	544.296	75.43	571000	7	F7:36154	WF4_80uL_long_1.raw	7	7	sp|P02746|C1QB_HUMAN
FNSDTHSSTF	58.24	1141.47	10	1.4	571.742	18.95	346000	1	F1:4556	WF1_80uL_long_1.raw	4	4	sp|P04406|G3P_HUMAN
M(+15.99)LGEFVSETESRGSES	58.23	1759.76	16	-0.8	880.885	38.09	46100	7	F7:17344	WF4_80uL_long_1.raw	3	3	sp|P02671|FIBA_HUMAN	Oxidation (M)	M1:Oxidation (M):1000.00
VQLSPDLLATLPEPA	58.23	1562.86	15	3.3	782.438	112.43	410000	1	F1:56583	WF1_80uL_long_1.raw	5	5	sp|Q04756|HGFA_HUMAN
N(+.98)IGEALGHGLGDAL	58.22	1336.66	14	1.1	669.339	97.96	656000	8	F8:43893	WF4_80uL_long_2.raw	7	7	sp|Q6E0U4|DMKN_HUMAN	Deamidation (NQ)	N1:Deamidation (NQ):1000.00
TATQKTVDGPSGKLW	58.22	1587.83	15	4.4	794.924	23.28	3650000	11	F11:11956	170303_WF1_2.raw	7	7	sp|P04406|G3P_HUMAN
DDDLEHQGGHV	58.22	1220.51	11	4.2	611.263	15.74	2610000	16	F16:5455	170303_WF3_2.raw	8	8	sp|P01042|KNG1_HUMAN
VYPWTQRFFESFGDLSTPDAV	58.21	2461.16	21	1.8	1231.59	114.95	188000000	12	F12:64129	170303_WF1_3.raw	12	12	sp|P68871|HBB_HUMAN
FKGFGGLTGQIV	58.21	1222.67	12	2.1	612.344	83.31	2330000	3	F3:55232	WF2_80uL_long_1.raw	7	7	sp|Q92954|PRG4_HUMAN
LNYKPEEEYPDLSKH	58.17	1860.89	15	0.9	621.304	25.86	31500000	10	F10:12273	WF5_80uL_long_2.raw	20	20	sp|P06732|KCRM_HUMAN
TSESGELHGLTTEEEFV	58.1	1863.84	17	4.5	932.93	78.65	891000	1	F1:34506	WF1_80uL_long_1.raw	5	5	sp|P02766|TTHY_HUMAN
KLDDDLEHQGGHVLD	58.09	1689.8	15	1.9	845.907	24	29800000	20	F20:10527	170303_WF5_2.raw	17	17	sp|P01042|KNG1_HUMAN
AGEYGAEALER	58.09	1164.54	11	2.4	583.279	24.32	123000	1	F1:6528	WF1_80uL_long_1.raw	3	3	sp|P69905|HBA_HUMAN
YQKVVAGVANAL	58.08	1231.69	12	-0.2	616.853	39.41	26800	10	F10:18880	WF5_80uL_long_2.raw	2	2	sp|P68871|HBB_HUMAN:sp|P02042|HBD_HUMAN
DLPAVSEKDIQDL	58.06	1441.73	13	2	721.874	87.13	370000	5	F5:36726	WF3_80uL_long_1.raw	2	2	sp|P14618|KPYM_HUMAN
SGEGDFLAEGGGV	58.06	1193.52	13	2.6	597.769	74.55	4560000	1	F1:32077	WF1_80uL_long_1.raw	9	9	sp|P02671|FIBA_HUMAN
VNVEVSPFTIEM(+15.99)SAFGYVFPKAV	58.06	2546.28	23	3.9	849.769	117.09	18200000	1	F1:60360	WF1_80uL_long_1.raw	11	11	sp|P04114|APOB_HUMAN	Oxidation (M)	M12:Oxidation (M):1000.00
AAWGKVGAHAGEYGAEALERM(+15.99)FL	58.04	2449.18	23	1.4	817.403	92.81	12300000	5	F5:39145	WF3_80uL_long_1.raw	7	7	sp|P69905|HBA_HUMAN	Oxidation (M)	M21:Oxidation (M):1000.00
IAIPGLAGAGNSVLLV	58.04	1463.87	16	0.7	732.943	115.06	1580000	3	F3:80384	WF2_80uL_long_1.raw	9	9	sp|P26599|PTBP1_HUMAN
ALNLPTLPEVKF	58.03	1340.77	12	-0.7	671.392	106.4	7000000	4	F4:59943	WF2_80uL_long_2.raw	7	7	sp|P04114|APOB_HUMAN
VDVDVPDVNIEGPDAKL	58	1793.9	17	2.7	897.962	91.05	4550000	14	F14:43670	170303_WF2_2.raw	14	14	sp|Q09666|AHNK_HUMAN
ISEGLPALEFPNE	57.99	1414.7	13	1.4	708.357	106.4	16700	6	F6:46710	WF3_80uL_long_2.raw	1	1	sp|P02748|CO9_HUMAN
IPLDLVPKTEI	57.98	1236.73	11	2.2	619.375	87.17	13500000	5	F5:36714	WF3_80uL_long_1.raw	17	17	sp|P01031|CO5_HUMAN
FLSYFVELGTQPATQ	57.98	1699.85	15	2.6	850.932	110.86	1160000	5	F5:49061	WF3_80uL_long_1.raw	11	11	sp|P02652|APOA2_HUMAN
VKLFDSDPITV	57.98	1232.67	11	2.7	617.341	90.01	3260000	1	F1:41570	WF1_80uL_long_1.raw	8	8	sp|P10909|CLUS_HUMAN
LM(+15.99)IEQNTKSPLFM(+15.99)GKV	57.97	1866.96	16	0.6	623.327	45.57	19300000	20	F20:20893	170303_WF5_2.raw	5	5	sp|P01009|A1AT_HUMAN	Oxidation (M)	M2:Oxidation (M):1000.00;M13:Oxidation (M):1000.00
VGDDLTVTNPK	57.97	1157.59	11	1.7	579.805	17.22	662000	10	F10:6874	WF5_80uL_long_2.raw	6	6	sp|P06733|ENOA_HUMAN:sp|P13929|ENOB_HUMAN
GTELVNFLSYF	57.96	1288.63	11	-1.8	645.323	117.7	132000	4	F4:68339	WF2_80uL_long_2.raw	1	1	sp|P02652|APOA2_HUMAN
SLKPSEAPELDEDEGFGDWSQRPEQ	57.95	2845.27	25	2.7	949.432	74.17	1130000	6	F6:31371	WF3_80uL_long_2.raw	3	3	sp|P33241|LSP1_HUMAN
TVDGPSGKLW	57.95	1058.54	10	2.3	530.278	40.44	23000000	10	F10:19634	WF5_80uL_long_2.raw	16	16	sp|P04406|G3P_HUMAN
HDNFGIVEGLM(+15.99)T	57.94	1347.61	12	1.2	674.814	68.63	13500000	20	F20:31778	170303_WF5_2.raw	14	14	sp|P04406|G3P_HUMAN	Oxidation (M)	M11:Oxidation (M):1000.00
WYDNEFGYSNR	57.91	1449.6	11	3.7	725.807	52.09	1590000	10	F10:24915	WF5_80uL_long_2.raw	5	5	sp|P04406|G3P_HUMAN
GTLSGIGTLDGF	57.91	1136.57	12	2.2	569.294	105.44	743000	6	F6:46083	WF3_80uL_long_2.raw	6	6	sp|P02671|FIBA_HUMAN
ISWYDNEFGYSN	57.89	1493.61	12	0.8	747.813	104.15	175000	4	F4:58076	WF2_80uL_long_2.raw	2	2	sp|P04406|G3P_HUMAN
AGTELVNFLSYFVELGTQPAT	57.89	2256.13	21	0.9	1129.07	117.89	26100000	10	F10:67530	WF5_80uL_long_2.raw	22	22	sp|P02652|APOA2_HUMAN
SLTTNIM(+15.99)EILR	57.88	1305.7	11	1.7	653.856	87.03	1460000	5	F5:36762	WF3_80uL_long_1.raw	5	5	sp|P02671|FIBA_HUMAN	Oxidation (M)	M7:Oxidation (M):1000.00
SSRQ(+.98)LGLPGPPDVPDHA	57.84	1742.86	17	1.4	872.438	63.51	45200000	14	F14:29681	170303_WF2_2.raw	18	18	sp|Q14624|ITIH4_HUMAN	Deamidation (NQ)	Q4:Deamidation (NQ):1000.00
GKVIPELN(+.98)GKLT	57.81	1268.73	12	0.7	635.375	33.52	34900000	11	F11:19319	170303_WF1_2.raw	17	17	sp|P04406|G3P_HUMAN	Deamidation (NQ)	N8:Deamidation (NQ):1000.00
SSRQLGLPGPPDVPDHAAYHPF	57.8	2357.16	22	0.9	786.726	65.58	5480000	7	F7:31791	WF4_80uL_long_1.raw	4	4	sp|Q14624|ITIH4_HUMAN
GVYSSDVFDIFPGTYQ	57.8	1793.81	16	2.2	897.917	115.83	2100000	9	F9:60154	WF5_80uL_long_1.raw	11	11	sp|P00450|CERU_HUMAN
NNPDWGTFEEV	57.77	1306.55	11	1.4	654.282	94.41	1320000	6	F6:39916	WF3_80uL_long_2.raw	4	4	sp|P02671|FIBA_HUMAN
KASGPPVSELI	57.76	1096.61	11	1	549.314	43.65	19600000	5	F5:18031	WF3_80uL_long_1.raw	15	15	sp|P16403|H12_HUMAN:sp|P10412|H14_HUMAN:sp|P16402|H13_HUMAN
DDLQKRLAVYQAGAREGA	57.76	1960.01	18	0.8	654.345	39.87	5120000	14	F14:18689	170303_WF2_2.raw	4	4	sp|P02649|APOE_HUMAN
IIGGSSSLPGSHPWLAA	57.76	1648.86	17	3	825.438	76.4	15400000	13	F13:44099	170303_WF2_1.raw	12	12	sp|Q04756|HGFA_HUMAN
LHELQEKLSPL	57.71	1305.73	11	1.9	653.873	35.02	6310000	16	F16:13640	170303_WF3_2.raw	13	13	sp|P02647|APOA1_HUMAN
GAFSDGLAHLDNL	57.71	1328.64	13	2.8	665.327	99.8	6010000	1	F1:46351	WF1_80uL_long_1.raw	14	14	sp|P68871|HBB_HUMAN:sp|P02042|HBD_HUMAN
SQFEGSALGKQL	57.69	1263.65	12	2.1	632.832	37.26	3950000	9	F9:17798	WF5_80uL_long_1.raw	10	10	sp|P02647|APOA1_HUMAN
DDLYVSDAFH	57.68	1180.5	10	2	591.26	63.78	2220000	9	F9:30222	WF5_80uL_long_1.raw	4	4	sp|P01008|ANT3_HUMAN
TSYQPPQNPYYYVDGD	57.66	1905.81	16	2.8	953.913	87.38	659000	16	F16:32889	170303_WF3_2.raw	10	10	sp|Q06033|ITIH3_HUMAN
SSGTGGTATWKPGSSGP	57.66	1533.71	17	1.3	767.861	17.36	2890000	6	F6:6090	WF3_80uL_long_2.raw	7	7	sp|P02671|FIBA_HUMAN
SSDPGAEEREEL	57.65	1317.57	12	2.1	659.793	16.93	4860000	5	F5:5469	WF3_80uL_long_1.raw	15	15	sp|P33241|LSP1_HUMAN
IFGSYDPR	57.65	953.461	8	0.9	477.738	29.22	44700000	13	F13:15932	170303_WF2_1.raw	9	9	sp|P08311|CATG_HUMAN
KVADALTNAV	57.64	1000.56	10	-0.3	501.285	25.79	41100000	11	F11:13913	170303_WF1_2.raw	18	18	sp|P69905|HBA_HUMAN
INVAVHVF	57.62	897.507	8	2.8	449.762	56.61	121000	7	F7:26668	WF4_80uL_long_1.raw	1	1	sp|P02766|TTHY_HUMAN
LTPYADEFKV	57.62	1181.6	10	1.7	591.807	62.3	11500000	18	F18:24831	170303_WF4_2.raw	7	7	sp|P06727|APOA4_HUMAN
FVSETESRGSESGIFTNT	57.61	1946.89	18	4.4	974.454	44.89	7530000	6	F6:19090	WF3_80uL_long_2.raw	10	10	sp|P02671|FIBA_HUMAN
WGKVGAHAGEYGAEALERM(+15.99)FL	57.61	2307.11	21	0.5	770.044	84.33	802000	6	F6:36357	WF3_80uL_long_2.raw	5	5	sp|P69905|HBA_HUMAN	Oxidation (M)	M19:Oxidation (M):1000.00
VHASLDKFLASVSTV	57.61	1572.85	15	2.5	787.435	86.48	4310000	11	F11:55449	170303_WF1_2.raw	12	12	sp|P69905|HBA_HUMAN
GIFTDQ(+.98)VLSVLKGEE	57.6	1634.84	15	1.8	818.429	113.33	5560000	13	F13:70818	170303_WF2_1.raw	19	19	sp|P02655|APOC2_HUMAN	Deamidation (NQ)	Q6:Deamidation (NQ):1000.00
YFPHFDLS	57.59	1024.47	8	1.8	513.241	80.34	564000000	5	F5:34224	WF3_80uL_long_1.raw	16	16	sp|P69905|HBA_HUMAN
KIVLDPSGSM(+15.99)NIYLV	57.58	1663.89	15	0.1	832.95	97.41	32600000	1	F1:45124	WF1_80uL_long_1.raw	17	17	sp|P00751|CFAB_HUMAN	Oxidation (M)	M10:Oxidation (M):1000.00
AKIDQNVEELKG	57.57	1342.71	12	3.7	672.364	15.37	2880000	8	F8:5274	WF4_80uL_long_2.raw	6	6	sp|P06727|APOA4_HUMAN
NYKPEEEYPDLS	57.56	1482.65	12	2.3	742.335	36.37	23400000	3	F3:21106	WF2_80uL_long_1.raw	18	18	sp|P06732|KCRM_HUMAN
GDSTFESKSY	57.56	1119.47	10	1.9	560.744	16.58	56300	6	F6:5614	WF3_80uL_long_2.raw	1	1	sp|P02671|FIBA_HUMAN
GRPFISQYNV	57.55	1179.6	10	2.6	590.811	45.42	16000000	3	F3:27706	WF2_80uL_long_1.raw	16	16	sp|P05156|CFAI_HUMAN
VSQYFQTVTDYGKDL	57.54	1762.84	15	1	882.429	90.42	7790	10	F10:47425	WF5_80uL_long_2.raw	2	2	sp|P02652|APOA2_HUMAN
KVGAHAGEYGAEALER	57.52	1656.82	16	1.6	553.282	13.03	373000	11	F11:4468	170303_WF1_2.raw	5	5	sp|P69905|HBA_HUMAN
SQDLGQHGLEEDF	57.52	1473.64	13	4.2	737.829	51.71	466000	9	F9:24293	WF5_80uL_long_1.raw	6	6	sp|P10124|SRGN_HUMAN
GVLALSKEEQE	57.52	1201.62	11	1.5	601.818	22.38	129000	10	F10:10135	WF5_80uL_long_2.raw	3	3	sp|Q0VD83|APOBR_HUMAN
VVYPWTQRFFESF	57.52	1704.83	13	-0.1	853.422	113.29	1880000	1	F1:57262	WF1_80uL_long_1.raw	7	7	sp|P68871|HBB_HUMAN:sp|P02042|HBD_HUMAN
GRLTPYADEF	57.51	1167.56	10	1.9	584.786	51.36	1380000	8	F8:22631	WF4_80uL_long_2.raw	5	5	sp|P06727|APOA4_HUMAN
GGGALLGDRWILT	57.51	1327.72	13	1.5	664.871	96.5	38800000	4	F4:52824	WF2_80uL_long_2.raw	10	10	sp|P00736|C1R_HUMAN
GLVEKVQAAVGTSAAPVPSD	57.5	1895	20	3.3	948.51	76.28	166000	8	F8:34151	WF4_80uL_long_2.raw	2	2	sp|P02649|APOE_HUMAN
GVNLQEFLNV	57.49	1131.59	10	1.3	566.804	111.24	3820000	14	F14:56822	170303_WF2_2.raw	18	17	sp|P00488|F13A_HUMAN
FNKPFVF	57.48	897.475	7	1.5	449.745	62.4	351000000	10	F10:31782	WF5_80uL_long_2.raw	20	20	sp|P01009|A1AT_HUMAN
DEPPQSPWDRVKDLATV	57.44	1951.96	17	2.4	976.992	99.69	38400000	14	F14:48543	170303_WF2_2.raw	9	9	sp|P02647|APOA1_HUMAN
VLEYLTAEILE	57.44	1291.69	11	2.6	646.855	112.38	341000	8	F8:52833	WF4_80uL_long_2.raw	6	6	sp|Q6FI13|H2A2A_HUMAN:sp|O75367|H2AY_HUMAN
WTQRFFESF	57.42	1246.58	9	1.8	624.297	91.89	398000	9	F9:44084	WF5_80uL_long_1.raw	2	2	sp|P68871|HBB_HUMAN:sp|P02042|HBD_HUMAN
HDNFGIVEGLM(+15.99)	57.42	1246.57	11	-2.1	624.289	67.16	131000	9	F9:31884	WF5_80uL_long_1.raw	4	4	sp|P04406|G3P_HUMAN	Oxidation (M)	M11:Oxidation (M):1000.00
PHVFM(+15.99)PEVTPDM(+15.99)DYLPR	57.4	2074.95	17	1.5	692.658	62.78	24600000	15	F15:24042	170303_WF3_1.raw	11	11	sp|Q92954|PRG4_HUMAN	Oxidation (M)	M5:Oxidation (M):1000.00;M12:Oxidation (M):1000.00
VLSPADKTNV	57.39	1042.57	10	1.3	522.291	14.27	76300000	5	F5:3996	WF3_80uL_long_1.raw	29	29	sp|P69905|HBA_HUMAN
SYAAWIDSVLA	57.37	1194.59	11	2.2	598.305	114.17	5210000	9	F9:58904	WF5_80uL_long_1.raw	17	17	sp|P00746|CFAD_HUMAN
LGGHLDQQVEEF	57.37	1370.65	12	2.2	686.332	49.98	694000000	6	F6:21478	WF3_80uL_long_2.raw	14	14	sp|P06727|APOA4_HUMAN
RFSPYVFNGGTILAI	57.36	1653.89	15	0.7	827.952	107.37	2040000	11	F11:71598	170303_WF1_2.raw	3	3
NM(+15.99)GAHFGGYLV	57.35	1180.53	11	1.7	591.275	47.76	13600000	16	F16:18357	170303_WF3_2.raw	18	18	sp|P13805|TNNT1_HUMAN	Oxidation (M)	M2:Oxidation (M):1000.00
VNDNEEGFFSAR	57.35	1383.61	12	1.7	692.811	40.59	1150000	3	F3:24218	WF2_80uL_long_1.raw	6	6	sp|P02675|FIBB_HUMAN
LSSLTETIEGVDAEDGHGPGEQQ	57.35	2368.07	23	0.5	1185.04	74.82	1980000	7	F7:35894	WF4_80uL_long_1.raw	7	7	sp|P00751|CFAB_HUMAN
YISPDQLADLY	57.35	1296.62	11	2.1	649.321	107.14	5330000	10	F10:58821	WF5_80uL_long_2.raw	12	12	sp|P06733|ENOA_HUMAN
EFVSETESRGSESGIFTNT	57.34	2075.93	19	0.4	1038.97	59.52	2590000	16	F16:22511	170303_WF3_2.raw	13	13	sp|P02671|FIBA_HUMAN
DQVPDTESETRI	57.34	1388.64	12	2.2	695.33	25.56	12100000	6	F6:10672	WF3_80uL_long_2.raw	20	20	sp|P01024|CO3_HUMAN
IDTPDIDIHGPEG	57.33	1377.64	13	3.5	689.83	59.24	329000	9	F9:28102	WF5_80uL_long_1.raw	3	3	sp|Q09666|AHNK_HUMAN
TDFLAPGVSSF	57.33	1139.55	11	1.3	570.783	105.31	1790000	5	F5:45437	WF3_80uL_long_1.raw	12	12	sp|Q14515|SPRL1_HUMAN
LAVYQAGAREGAE	57.33	1333.66	13	2.6	667.84	18	455000	10	F10:7517	WF5_80uL_long_2.raw	5	5	sp|P02649|APOE_HUMAN
QEKLSPLGEEM(+15.99)	57.32	1275.6	11	3.5	638.81	21.66	495000	9	F9:9831	WF5_80uL_long_1.raw	8	8	sp|P02647|APOA1_HUMAN	Oxidation (M)	M11:Oxidation (M):1000.00
SWFEPLVEDM(+15.99)Q	57.32	1395.6	11	2.3	698.81	108.01	8770000	7	F7:53391	WF4_80uL_long_1.raw	11	11	sp|P02649|APOE_HUMAN	Oxidation (M)	M10:Oxidation (M):1000.00
FESFGDLSTPDA	57.32	1284.55	12	1.5	643.284	87.92	6180000	6	F6:37639	WF3_80uL_long_2.raw	20	20	sp|P68871|HBB_HUMAN
ATWLSLFSSEE	57.31	1268.59	11	-3.3	635.301	115.78	661000	5	F5:51649	WF3_80uL_long_1.raw	6	6	sp|P04004|VTNC_HUMAN
ADQLRTQVNTQAEQL	57.3	1713.86	15	-4.6	857.936	34.11	934000	9	F9:16287	WF5_80uL_long_1.raw	9	9	sp|P06727|APOA4_HUMAN
TLDAGLVYDAYLAPNNLKPV	57.26	2146.13	20	3.5	1074.08	106.53	6740000	11	F11:70865	170303_WF1_2.raw	15	15	sp|P02787|TRFE_HUMAN
HELQEKLSPL	57.23	1192.65	10	1.6	597.331	23.46	35000000	8	F8:10078	WF4_80uL_long_2.raw	26	26	sp|P02647|APOA1_HUMAN
FTSSTSYN(+.98)RGDSTF	57.22	1569.66	14	1.6	785.838	32.47	243000	16	F16:12743	170303_WF3_2.raw	6	6	sp|P02671|FIBA_HUMAN	Deamidation (NQ)	N8:Deamidation (NQ):1000.00
LVVYPWTQRFF	57.2	1454.77	11	2.1	728.394	108.15	227000	10	F10:59666	WF5_80uL_long_2.raw	3	3	sp|P68871|HBB_HUMAN:sp|P02042|HBD_HUMAN:sp|P69891|HBG1_HUMAN:sp|P69892|HBG2_HUMAN
VM(+15.99)IYQDEVKLPA	57.18	1420.73	12	1.6	711.372	61.67	683000	8	F8:27487	WF4_80uL_long_2.raw	4	4	sp|Q6NZI2|CAVN1_HUMAN	Oxidation (M)	M2:Oxidation (M):1000.00
VAEFYGSKEDPQTFYYAV	57.18	2112.97	18	3.1	1057.49	94.38	5240000	11	F11:61250	170303_WF1_2.raw	11	11	sp|P02787|TRFE_HUMAN
YVNKEIQNAVN(+.98)GV	57.18	1447.73	13	2.3	724.874	29.28	1910000	6	F6:12254	WF3_80uL_long_2.raw	6	6	sp|P10909|CLUS_HUMAN	Deamidation (NQ)	N11:Deamidation (NQ):78.06
SFEFPVGDAV	57.14	1066.5	10	3	534.257	103.18	2880000	4	F4:57300	WF2_80uL_long_2.raw	2	2
SIIQEKTSNF	57.13	1165.6	10	3.9	583.808	26.57	880000	8	F8:11407	WF4_80uL_long_2.raw	2	2	sp|P02748|CO9_HUMAN
EYQTFFNPR	57.12	1200.56	9	1.1	601.286	48.31	1560000	16	F16:18544	170303_WF3_2.raw	4	4	sp|P00734|THRB_HUMAN
SIQEIQELDKDDESL	57.1	1760.83	15	1.9	881.425	71.12	4410000	5	F5:29790	WF3_80uL_long_1.raw	9	9	sp|P52565|GDIR1_HUMAN
RLLLPGELAKHAV	57.08	1415.86	13	0.9	472.961	35.95	77000000	19	F19:16807	170303_WF5_1.raw	18	18
SFSILGSDVR	57.08	1079.56	10	-0.4	540.788	56.34	7140000	19	F19:25742	170303_WF5_1.raw	17	17	sp|P04114|APOB_HUMAN
GNEAGRFGQGV	57.08	1090.52	11	3.3	546.267	15.46	341000	6	F6:5000	WF3_80uL_long_2.raw	5	5	sp|Q6UWP8|SBSN_HUMAN
GNPTVEVDLFTSKGLF	57.08	1722.88	16	-1.1	862.448	107.96	857000	16	F16:42534	170303_WF3_2.raw	3	3	sp|P06733|ENOA_HUMAN
TALWGKV	57.07	773.443	7	0.4	387.729	33.37	69500000	11	F11:19228	170303_WF1_2.raw	17	17	sp|P68871|HBB_HUMAN
FFSPVSIATAFA	57.07	1256.64	12	2.5	629.331	117.23	40900	3	F3:82144	WF2_80uL_long_1.raw	2	2	sp|P01009|A1AT_HUMAN
SAVTALWGKV	57.06	1030.58	10	1.8	516.299	70.02	525000	9	F9:33233	WF5_80uL_long_1.raw	5	5	sp|P68871|HBB_HUMAN
LNHQLEGLTF	57.06	1170.6	10	3.6	586.311	63.65	20400000	5	F5:26615	WF3_80uL_long_1.raw	20	20	sp|P06727|APOA4_HUMAN
SSIIDELFQDRF	57.06	1468.72	12	3.3	735.37	113.33	16600	6	F6:50988	WF3_80uL_long_2.raw	2	2	sp|P10909|CLUS_HUMAN
VVSLGSPSGEVS	57.06	1116.57	12	-2	559.289	35.31	325000	8	F8:15372	WF4_80uL_long_2.raw	5	5	sp|P02765|FETUA_HUMAN
VKDLATVYVDVL	57.02	1333.75	12	0.7	667.882	95.68	335000	6	F6:40430	WF3_80uL_long_2.raw	2	2	sp|P02647|APOA1_HUMAN
LKPEEEAPAPEVGASKPEG	57.01	1933.96	19	1.1	967.99	16.21	27100000	15	F15:5733	170303_WF3_1.raw	12	12	sp|P04004|VTNC_HUMAN
VRELEGEVESEQ	57	1402.66	12	0.9	702.337	17.46	546000	5	F5:5762	WF3_80uL_long_1.raw	8	8	sp|P12882|MYH1_HUMAN
FLSALEEYTK	56.99	1199.61	10	1.9	600.812	65.59	11400000	4	F4:34036	WF2_80uL_long_2.raw	13	12	sp|P02647|APOA1_HUMAN
LLKLGN(+.98)QEPGGQTA	56.98	1425.75	14	0.8	713.881	29.19	303000	7	F7:13101	WF4_80uL_long_1.raw	3	3	sp|P08697|A2AP_HUMAN	Deamidation (NQ)	N6:Deamidation (NQ):20.00
AFLEVNEEGSEAAA	56.98	1435.65	14	2.4	718.832	62.06	661000	9	F9:29521	WF5_80uL_long_1.raw	2	2	sp|P01008|ANT3_HUMAN
WNSGSSGTGSTGNQNPGSPRPG	56.98	2100.92	22	1	1051.47	13.06	25400	3	F3:3259	WF2_80uL_long_1.raw	1	1	sp|P02671|FIBA_HUMAN
GSESGIFTN(+.98)TKES	56.97	1356.6	13	-0.4	679.309	21.74	1350000	5	F5:8108	WF3_80uL_long_1.raw	5	5	sp|P02671|FIBA_HUMAN	Deamidation (NQ)	N9:Deamidation (NQ):1000.00
FLGDIALDEEDL	56.97	1348.64	12	3	675.329	111.11	244000	6	F6:49840	WF3_80uL_long_2.raw	4	4	sp|P13497|BMP1_HUMAN
SLAPYAQDTQE	56.96	1221.55	11	1.5	611.784	30.03	1060000	5	F5:11894	WF3_80uL_long_1.raw	4	4	sp|P06727|APOA4_HUMAN
SLLSFM(+15.99)QGYM(+15.99)KH	56.96	1472.68	12	1.5	737.348	35.34	3150000	11	F11:20654	170303_WF1_2.raw	4	4	sp|P02656|APOC3_HUMAN	Oxidation (M)	M6:Oxidation (M):1000.00;M10:Oxidation (M):1000.00
TIAQGGVLPNIQAV	56.94	1379.78	14	1.2	690.897	94.31	50500000	14	F14:45369	170303_WF2_2.raw	18	18	sp|Q6FI13|H2A2A_HUMAN
LLFKGSEM(+15.99)VV	56.93	1137.61	10	2.2	569.814	47.19	21600000	10	F10:22706	WF5_80uL_long_2.raw	20	20	sp|Q14624|ITIH4_HUMAN	Oxidation (M)	M8:Oxidation (M):1000.00
LGPLVEQGRV	56.93	1066.61	10	1.2	534.315	29.27	10900000	19	F19:13503	170303_WF5_1.raw	11	11	sp|P02649|APOE_HUMAN
FSDGLAHLD	56.92	973.451	9	1.7	487.733	37.75	20800000	10	F10:18209	WF5_80uL_long_2.raw	16	16	sp|P68871|HBB_HUMAN:sp|P02042|HBD_HUMAN
AHAGEYGAEALERM(+15.99)FL	56.89	1779.83	16	-0.1	890.92	79.95	20500000	11	F11:50446	170303_WF1_2.raw	17	17	sp|P69905|HBA_HUMAN	Oxidation (M)	M14:Oxidation (M):1000.00
KVADALTNAVAHV	56.88	1307.72	13	0.4	654.867	44.61	250000	11	F11:26216	170303_WF1_2.raw	3	3	sp|P69905|HBA_HUMAN
FLDFIGHILT	56.86	1174.64	10	0.7	588.327	111.42	240000	19	F19:57965	170303_WF5_1.raw	7	7
AFFDTASTGKTFPGFFSPM(+15.99)	56.84	2070.94	19	-3.3	1036.47	108.85	27300000	20	F20:56366	170303_WF5_2.raw	18	18	sp|P02671|FIBA_HUMAN	Oxidation (M)	M19:Oxidation (M):1000.00
FEITVPESQLT	56.84	1262.64	11	1.6	632.328	96.75	19700000	4	F4:52853	WF2_80uL_long_2.raw	9	9	sp|P04114|APOB_HUMAN
SEAEDASLLSF	56.84	1167.53	11	2	584.773	102.02	5320000	8	F8:46245	WF4_80uL_long_2.raw	10	10	sp|P02656|APOC3_HUMAN
SDFNSDTHSSTF	56.83	1343.53	12	3	672.773	22.91	4090000	20	F20:9946	170303_WF5_2.raw	8	8	sp|P04406|G3P_HUMAN
HHPGIAEFPSR	56.83	1246.62	11	0.8	416.548	12.59	4880000	13	F13:4115	170303_WF2_1.raw	12	12	sp|P02671|FIBA_HUMAN
TALWGKVNV	56.83	986.555	9	-1	494.284	53.52	6090000	11	F11:32372	170303_WF1_2.raw	11	11	sp|P68871|HBB_HUMAN
LGEFVSETESRGSESGIFT	56.81	2030.94	19	-0.8	1016.48	80.93	2410000	16	F16:30412	170303_WF3_2.raw	8	8	sp|P02671|FIBA_HUMAN
RLQAEAFQA	56.8	1032.54	9	1.3	517.275	20.45	12300000	10	F10:9027	WF5_80uL_long_2.raw	9	9	sp|P02649|APOE_HUMAN
IDAAEEEKY	56.79	1066.48	9	1.6	534.249	17.36	9330000	1	F1:4102	WF1_80uL_long_1.raw	11	11	sp|P48788|TNNI2_HUMAN
TGKTFPGFFSPM(+15.99)LGE	56.79	1630.77	15	2.5	816.394	94.09	672000	7	F7:45284	WF4_80uL_long_1.raw	6	6	sp|P02671|FIBA_HUMAN	Oxidation (M)	M12:Oxidation (M):1000.00
GRTLYGFGG	56.79	926.461	9	0	464.238	35.45	1770000	15	F15:13820	170303_WF3_1.raw	8	8	sp|P62805|H4_HUMAN
LWRGLPNVVTSAI	56.77	1424.81	13	0.2	713.414	100.55	1150000	13	F13:60465	170303_WF2_1.raw	7	7	sp|Q92954|PRG4_HUMAN
TYFPHFDL	56.76	1038.48	8	1	520.248	93.8	776000000	20	F20:45990	170303_WF5_2.raw	18	17	sp|P69905|HBA_HUMAN
AVTFEYPSNAVEEVTQNNF	56.73	2157.99	19	-0.4	1080	109.08	7250000	14	F14:55204	170303_WF2_2.raw	15	15	sp|Q14624|ITIH4_HUMAN
SENFDDYM(+15.99)KEV	56.73	1391.56	11	2	696.786	37.26	27000	10	F10:17905	WF5_80uL_long_2.raw	2	2	sp|P15090|FABP4_HUMAN	Oxidation (M)	M8:Oxidation (M):1000.00
LKELIELPPFEIV	56.72	1538.9	13	2.8	770.457	111.68	3390000	9	F9:56960	WF5_80uL_long_1.raw	17	17
ARGWVTDGF	56.7	1007.48	9	2.3	504.75	52.41	290000	8	F8:22968	WF4_80uL_long_2.raw	3	3	sp|P02656|APOC3_HUMAN
SELTQDPAVSV	56.67	1144.56	11	2	573.289	53.1	127000	1	F1:20533	WF1_80uL_long_1.raw	2	2	sp|P01714|LV319_HUMAN
SAESGEQVERVNEPSILEM(+15.99)S	56.67	2206.01	20	0.7	1104.01	52.16	3480000	18	F18:21096	170303_WF4_2.raw	9	9	sp|O14791|APOL1_HUMAN	Oxidation (M)	M19:Oxidation (M):1000.00
GDELADSALEIF	56.65	1278.6	12	1.3	640.307	113.61	1010000	5	F5:50537	WF3_80uL_long_1.raw	10	10	sp|Q15582|BGH3_HUMAN
KLEVANM(+15.99)QAELV	56.65	1359.71	12	2.6	680.862	38.53	5660000	3	F3:22968	WF2_80uL_long_1.raw	11	11	sp|P04114|APOB_HUMAN	Oxidation (M)	M7:Oxidation (M):1000.00
VDVEGPDVNIEGPEGKL	56.63	1765.87	17	-0.8	883.943	73.57	0	9	F9:34874	WF5_80uL_long_1.raw	0	0	sp|Q09666|AHNK_HUMAN
VLGQLGITKV	56.63	1026.64	10	2	514.33	47.91	2550000	9	F9:22616	WF5_80uL_long_1.raw	6	6	sp|P01009|A1AT_HUMAN
GLTTEEEFVEGIYKV	56.62	1712.85	15	0.1	857.433	104.96	586000	6	F6:45719	WF3_80uL_long_2.raw	12	12	sp|P02766|TTHY_HUMAN
SDLLSAIRQGFQL	56.61	1446.78	13	1.3	724.4	112.71	173000	3	F3:78442	WF2_80uL_long_1.raw	5	5	sp|Q9Y6W5|WASF2_HUMAN
SSFLPWIRTTM(+15.99)	56.61	1353.67	11	1.3	677.846	99.69	39800000	6	F6:42420	WF3_80uL_long_2.raw	17	17	sp|P08311|CATG_HUMAN	Oxidation (M)	M11:Oxidation (M):1000.00
YLAAVLEYLTAEILEL	56.6	1823	16	1.7	912.507	118.36	56400	10	F10:67837	WF5_80uL_long_2.raw	3	3
RLLLPGELAKHAVSEGTKAVTKYTSSK	56.6	2883.62	27	1.7	721.913	71.06	1270000	11	F11:45329	170303_WF1_2.raw	1	1
ITNWDDM(+15.99)EKI	56.59	1279.58	10	1.3	640.796	36.91	69700	10	F10:17723	WF5_80uL_long_2.raw	2	2	sp|P68032|ACTC_HUMAN:sp|P68133|ACTS_HUMAN	Oxidation (M)	M7:Oxidation (M):1000.00
M(+15.99)LGEFVSETESRGSESGIFTNT	56.57	2393.07	22	3.7	1197.55	87.34	17900000	6	F6:37349	WF3_80uL_long_2.raw	9	9	sp|P02671|FIBA_HUMAN	Oxidation (M)	M1:Oxidation (M):1000.00
AFDLEIPKTAFI	56.57	1363.74	12	2.3	682.878	108.22	1060000	3	F3:74403	WF2_80uL_long_1.raw	9	9	sp|P19827|ITIH1_HUMAN
YLAAVLEYLT	56.56	1154.62	10	2.6	578.32	115.17	3130000	8	F8:54517	WF4_80uL_long_2.raw	10	10
YLAAVIEYLT	56.56	1154.62	10	2.6	578.32	115.17	3130000	8	F8:54517	WF4_80uL_long_2.raw	10	10
IEQNTKSPLF	56.55	1175.62	10	2.4	588.818	29.25	4380000	9	F9:14091	WF5_80uL_long_1.raw	7	7	sp|P01009|A1AT_HUMAN
LGTLSGIGTLD	56.55	1045.57	11	2	523.791	83.21	174000	5	F5:34920	WF3_80uL_long_1.raw	2	2	sp|P02671|FIBA_HUMAN
RLLLPGELAKHAVSEGTKAVTKYTSA	56.54	2739.53	26	1.6	914.185	80.13	54400000	13	F13:47328	170303_WF2_1.raw	14	14
FFSTFKEKESQD	56.53	1491.69	12	1.8	746.853	19.71	280000	15	F15:7687	170303_WF3_1.raw	2	2	sp|P06727|APOA4_HUMAN
SLM(+15.99)PFSPYEPLN	56.52	1409.65	12	1	705.835	100.21	28200000	6	F6:42726	WF3_80uL_long_2.raw	17	17	sp|P10909|CLUS_HUMAN	Oxidation (M)	M3:Oxidation (M):1000.00
ILPVPAFNVI	56.51	1081.65	10	2	541.835	113.83	418000	4	F4:65520	WF2_80uL_long_2.raw	5	5	sp|P06733|ENOA_HUMAN:sp|P13929|ENOB_HUMAN
KLLSGGNTLHLV	56.51	1250.73	12	1.8	626.376	37.12	117000000	20	F20:16931	170303_WF5_2.raw	20	20	sp|P04114|APOB_HUMAN
AFSDGLAHLD	56.5	1044.49	10	0.3	523.251	50.63	1040000	15	F15:19344	170303_WF3_1.raw	10	10	sp|P68871|HBB_HUMAN:sp|P02042|HBD_HUMAN
VNPTVFFDIAVDGEPLGRV	56.5	2044.06	19	2.3	682.363	114.5	289000	1	F1:58234	WF1_80uL_long_1.raw	4	4	sp|P62937|PPIA_HUMAN
LNTFHIPSFTI	56.5	1288.68	11	2.4	645.35	106.93	8490000	2	F2:54157	WF1_80uL_long_2.raw	8	8	sp|P04114|APOB_HUMAN
PRPYPPNVGEEI	56.49	1366.69	12	0	684.351	42.64	1350000	4	F4:20640	WF2_80uL_long_2.raw	10	10	sp|P02751|FINC_HUMAN
VLDPFTIKPLD	56.48	1256.7	11	2.3	629.36	100.68	939000	3	F3:67849	WF2_80uL_long_1.raw	5	5	sp|P29401|TKT_HUMAN
VIDPFTIKPLD	56.48	1256.7	11	2.3	629.36	100.68	939000	3	F3:67849	WF2_80uL_long_1.raw	5	5
ILGSDVRVPSYTL	56.47	1418.78	13	3.3	710.398	87.14	589000	2	F2:41719	WF1_80uL_long_2.raw	4	4	sp|P04114|APOB_HUMAN
EGVQKEDIPPADLSDQVPDTESETR	56.46	2754.28	25	3.3	919.105	49.26	12800000	8	F8:23225	WF4_80uL_long_2.raw	8	8	sp|P01024|CO3_HUMAN
WDNLEKETEGLR	56.46	1488.72	12	4.5	745.371	40.26	34800000	13	F13:21911	170303_WF2_1.raw	15	15	sp|P02647|APOA1_HUMAN
HHPGIAEFPSRG	56.45	1303.64	12	-1.3	435.554	12.48	310000000	11	F11:4002	170303_WF1_2.raw	33	33	sp|P02671|FIBA_HUMAN
IEQNTKSPLFM(+15.99)	56.45	1322.65	11	1.2	662.335	27.75	549000	10	F10:13071	WF5_80uL_long_2.raw	3	3	sp|P01009|A1AT_HUMAN	Oxidation (M)	M11:Oxidation (M):1000.00
EGPLKGILGYTEHQVV	56.45	1738.93	16	4.4	870.474	79.06	11300000	11	F11:49782	170303_WF1_2.raw	4	4	sp|P04406|G3P_HUMAN
WLNPDPSQKQN	56.45	1325.64	11	1.8	663.827	22.01	16300000	4	F4:9521	WF2_80uL_long_2.raw	14	14	sp|P10451|OSTP_HUMAN
GENFNKALVQQ	56.44	1246.63	11	-0.7	624.322	21.38	151000	17	F17:8704	170303_WF4_1.raw	2	2	sp|P06727|APOA4_HUMAN
AEAFLSSLTETI	56.43	1280.65	12	1.8	641.333	110.95	933000	6	F6:49808	WF3_80uL_long_2.raw	6	6	sp|P00751|CFAB_HUMAN
AHYDLRHTF	56.43	1158.56	9	0.2	580.286	16	12900000	11	F11:6746	170303_WF1_2.raw	6	6	sp|P02765|FETUA_HUMAN
EANYIGSDKYF	56.42	1305.59	11	-0.3	653.801	56.11	453000	16	F16:21271	170303_WF3_2.raw	4	4	sp|P0DJI8|SAA1_HUMAN:sp|P0DJI9|SAA2_HUMAN
DYGKDLM(+15.99)EKV	56.42	1212.57	10	2	607.293	21.65	117000000	10	F10:9866	WF5_80uL_long_2.raw	11	11	sp|P02652|APOA2_HUMAN	Oxidation (M)	M7:Oxidation (M):1000.00
RPPILAPSETL	56.42	1192.68	11	2.4	597.35	49.12	10300000	4	F4:23997	WF2_80uL_long_2.raw	17	17	sp|Q8IUX7|AEBP1_HUMAN
LGVLDLSTNVY	56.41	1192.63	11	1.7	597.325	108.32	746000	3	F3:74475	WF2_80uL_long_1.raw	8	8	sp|P04114|APOB_HUMAN
LDDDLEHQ(+.98)GGHV	56.4	1334.57	12	1.8	668.295	18.13	2760000	20	F20:7277	170303_WF5_2.raw	3	3	sp|P01042|KNG1_HUMAN	Deamidation (NQ)	Q8:Deamidation (NQ):1000.00
IITNWDDM(+15.99)EKI	56.35	1392.66	11	-3.2	697.335	55.81	72300	9	F9:26349	WF5_80uL_long_1.raw	1	1	sp|P68032|ACTC_HUMAN:sp|P68133|ACTS_HUMAN	Oxidation (M)	M8:Oxidation (M):1000.00
FFESFGDLSTPDA	56.35	1431.62	13	2.5	716.819	108.52	4440000	7	F7:53780	WF4_80uL_long_1.raw	13	13	sp|P68871|HBB_HUMAN
N(+.98)LGAPDINIEGL	56.35	1225.62	12	2.7	613.818	111.23	1130000	4	F4:63645	WF2_80uL_long_2.raw	8	8	sp|Q09666|AHNK_HUMAN	Deamidation (NQ)	N1:Deamidation (NQ):84.53
LLTEAPLNPK	56.35	1094.63	10	-0.1	548.324	26.15	45900000	13	F13:13686	170303_WF2_1.raw	17	17	sp|P60709|ACTB_HUMAN:sp|P63261|ACTG_HUMAN:sp|P68032|ACTC_HUMAN:sp|P68133|ACTS_HUMAN
PM(+15.99)SIPPEVKFNKPFVFL	56.34	2005.07	17	3.8	669.368	104.81	18100000	1	F1:50570	WF1_80uL_long_1.raw	9	9	sp|P01009|A1AT_HUMAN	Oxidation (M)	M2:Oxidation (M):1000.00
FLSSLTETIEGV	56.31	1294.67	12	1.9	648.341	108.3	666000	5	F5:47659	WF3_80uL_long_1.raw	7	7	sp|P00751|CFAB_HUMAN
SLDKFLASVSTVLTS	56.31	1566.85	15	1.5	784.434	113.11	31200000	3	F3:78707	WF2_80uL_long_1.raw	15	15	sp|P69905|HBA_HUMAN
AIVEALN(+.98)GKEV	56.31	1142.62	11	2.1	572.318	37.32	328000	10	F10:17934	WF5_80uL_long_2.raw	3	3	sp|Q99497|PARK7_HUMAN	Deamidation (NQ)	N7:Deamidation (NQ):1000.00
PNNPDWGTF	56.3	1046.45	9	0.8	524.231	74.59	497000000	16	F16:28082	170303_WF3_2.raw	20	20	sp|P02671|FIBA_HUMAN
VLGGIYEYTLV	56.3	1225.66	11	-0.2	613.837	109.25	17300000	18	F18:44177	170303_WF4_2.raw	15	15	sp|P07358|CO8B_HUMAN
AELGGHLDQQV	56.3	1165.57	11	0.5	583.794	23.57	3130000	11	F11:12171	170303_WF1_2.raw	7	7	sp|P06727|APOA4_HUMAN
IAATELEKEES	56.3	1218.6	11	2.1	610.308	18.51	559000	4	F4:7063	WF2_80uL_long_2.raw	2	2	sp|P48788|TNNI2_HUMAN
DESLQVAERLT	56.29	1259.64	11	3.9	630.828	54.04	1220000	4	F4:26746	WF2_80uL_long_2.raw	6	6	sp|P10909|CLUS_HUMAN
SESGSFRPDSPGSGN(+.98)A	56.28	1551.64	16	2.8	776.831	15.17	444000	9	F9:5609	WF5_80uL_long_1.raw	6	6	sp|P02671|FIBA_HUMAN	Deamidation (NQ)	N15:Deamidation (NQ):1000.00
VVYPWTQRF	56.23	1194.62	9	1.8	598.318	76.76	10700000	9	F9:36847	WF5_80uL_long_1.raw	8	8	sp|P68871|HBB_HUMAN:sp|P02042|HBD_HUMAN:sp|P69891|HBG1_HUMAN:sp|P69892|HBG2_HUMAN
SYSVYVYKVL	56.23	1219.65	10	2.2	610.833	77.78	49300	9	F9:37117	WF5_80uL_long_1.raw	2	2
LQASLRPHADEL	56.22	1348.71	12	2.2	675.364	21.33	246000	8	F8:8869	WF4_80uL_long_2.raw	2	2	sp|P06727|APOA4_HUMAN
SNEGKLEGLTDEF	56.22	1437.66	13	4.8	719.842	66.8	2040000	4	F4:34564	WF2_80uL_long_2.raw	6	6	sp|P39687|AN32A_HUMAN
NHQLEGLTFQ	56.22	1185.58	10	1.3	593.797	45.22	51600000	15	F15:17437	170303_WF3_1.raw	18	18	sp|P06727|APOA4_HUMAN
SGVTEEAPLKL	56.21	1142.62	11	1.9	572.317	43.65	1230000	7	F7:20131	WF4_80uL_long_1.raw	12	12	sp|P01009|A1AT_HUMAN
LLKLGNQEPGG	56.21	1124.62	11	1.9	563.318	22.22	15300000	8	F8:9340	WF4_80uL_long_2.raw	16	16	sp|P08697|A2AP_HUMAN
SGVQQLIQYYQDQKDA	56.2	1882.91	16	2.1	942.462	90.4	3240000	5	F5:37994	WF3_80uL_long_1.raw	5	5	sp|Q13790|APOF_HUMAN
GLTQPPSVSKGLRQTA	56.2	1638.91	16	1.8	820.461	18.76	624000	11	F11:8940	170303_WF1_2.raw	1	1
EVSADQVATVM(+15.99)WDYF	56.2	1775.77	15	2.5	888.895	112.77	879000	6	F6:50709	WF3_80uL_long_2.raw	7	7	sp|P06727|APOA4_HUMAN	Oxidation (M)	M11:Oxidation (M):1000.00
SLAPYAQDTQEK	56.15	1349.65	12	1.5	675.831	16.22	331000	5	F5:5037	WF3_80uL_long_1.raw	2	2	sp|P06727|APOA4_HUMAN
NDPFIDLNYM(+15.99)VY	56.15	1518.67	12	-2.6	760.34	111.16	713000	11	F11:74876	170303_WF1_2.raw	5	5	sp|P04406|G3P_HUMAN	Oxidation (M)	M10:Oxidation (M):1000.00
SIATAFAM(+15.99)LSL	56.14	1139.59	11	0.5	570.802	113.14	424000	11	F11:76602	170303_WF1_2.raw	5	5	sp|P01009|A1AT_HUMAN	Oxidation (M)	M8:Oxidation (M):1000.00
VHASLDKFLA	56.14	1099.6	10	1	550.809	33.41	10800000	12	F12:15831	170303_WF1_3.raw	7	7	sp|P69905|HBA_HUMAN
KLEEQAQQIRL	56.13	1354.76	11	0.3	678.386	23.32	2450000	7	F7:10253	WF4_80uL_long_1.raw	6	6	sp|P02649|APOE_HUMAN
VLPGGNLGAQNL	56.13	1151.63	12	1.1	576.823	66.03	427000	3	F3:42321	WF2_80uL_long_1.raw	1	1	sp|Q99497|PARK7_HUMAN
FLQATDKNSLLGM(+15.99)EGANSI	56.12	2023.99	19	-0.6	1013	74.77	835000	7	F7:35863	WF4_80uL_long_1.raw	5	5	sp|P02746|C1QB_HUMAN	Oxidation (M)	M13:Oxidation (M):1000.00
LGQLGITKVF	56.12	1074.64	10	1.1	538.33	73.1	3180000	11	F11:45726	170303_WF1_2.raw	9	9	sp|P01009|A1AT_HUMAN
FVELGTQPATQ	56.11	1189.6	11	2.4	595.808	43.83	2030000	10	F10:20936	WF5_80uL_long_2.raw	12	12	sp|P02652|APOA2_HUMAN
FYNQVSTPLL	56.11	1180.61	10	2.5	591.315	92.81	7950000	16	F16:34721	170303_WF3_2.raw	15	15	sp|P19823|ITIH2_HUMAN
KWQEEM(+15.99)ELY	56.11	1270.55	9	1.2	636.285	43.48	115000000	1	F1:16368	WF1_80uL_long_1.raw	20	20	sp|P02647|APOA1_HUMAN	Oxidation (M)	M6:Oxidation (M):1000.00
GIFTDQVLSVLK	56.09	1318.75	12	1.5	660.383	105.75	772000	13	F13:64656	170303_WF2_1.raw	4	4	sp|P02655|APOC2_HUMAN
TTGGM(+15.99)VLKLEQGENV	56.08	1590.79	15	1.9	796.405	38.65	23300000	7	F7:17883	WF4_80uL_long_1.raw	22	22	sp|P02746|C1QB_HUMAN	Oxidation (M)	M5:Oxidation (M):1000.00
VFSN(+.98)GADLSGVTEEAPL	56.08	1705.8	17	1.2	853.911	105.28	1890000	10	F10:57273	WF5_80uL_long_2.raw	7	7	sp|P01009|A1AT_HUMAN	Deamidation (NQ)	N4:Deamidation (NQ):1000.00
AVLEYLTAEIL	56.07	1233.69	11	2.1	617.851	116.68	419000	10	F10:66453	WF5_80uL_long_2.raw	4	4	sp|Q6FI13|H2A2A_HUMAN:sp|O75367|H2AY_HUMAN
DIQM(+15.99)TQSPSSLSASVGDRVTI	56.07	2207.07	21	2.8	1104.55	77.89	1910000	14	F14:36729	170303_WF2_2.raw	10	10		Oxidation (M)	M4:Oxidation (M):1000.00
SPGSGNARPNNPDWGTF	56.07	1772.79	17	2.5	887.403	46.48	466000	8	F8:20576	WF4_80uL_long_2.raw	7	7	sp|P02671|FIBA_HUMAN
FNTPFLNIDKL	56.07	1320.71	11	4	661.364	104.38	70300	7	F7:50811	WF4_80uL_long_1.raw	2	2	sp|P60985|KTDAP_HUMAN
SSASTKGPSVFPLAPSSKSTSG	56.06	2079.05	22	0.3	1040.53	26.72	17400000	12	F12:12425	170303_WF1_3.raw	6	6	sp|P0DOX5|IGG1_HUMAN
FSNGADLSGVTEEAPLKLS	56.06	1933.96	19	2.4	967.991	87.07	50600	3	F3:57765	WF2_80uL_long_1.raw	4	4	sp|P01009|A1AT_HUMAN
SLAPYAQDT	56.05	964.45	9	0.1	483.232	28.83	3560000	16	F16:11420	170303_WF3_2.raw	4	4	sp|P06727|APOA4_HUMAN
YFPHFDL	56.01	937.433	7	1.5	469.725	88.99	413000000	10	F10:47631	WF5_80uL_long_2.raw	20	20	sp|P69905|HBA_HUMAN
TLAAHLPAEFTPAVHA	55.98	1644.86	16	0.6	549.295	62.9	20000000	11	F11:38901	170303_WF1_2.raw	7	7	sp|P69905|HBA_HUMAN
DSVFSGFLLFPD	55.98	1342.64	12	-1	672.329	118	42400	1	F1:61180	WF1_80uL_long_1.raw	1	1	sp|P02747|C1QC_HUMAN
SFLSALEEYTKK	55.98	1414.73	12	0.9	708.375	89.91	875000	4	F4:48598	WF2_80uL_long_2.raw	7	7	sp|P02647|APOA1_HUMAN
TLTAFGFASA	55.93	984.492	10	2	493.254	101.46	43800	1	F1:47548	WF1_80uL_long_1.raw	2	2	sp|P04114|APOB_HUMAN
FEIPIN(+.98)GLSEF	55.93	1265.62	11	0.1	633.816	116.02	441000	8	F8:54985	WF4_80uL_long_2.raw	9	9	sp|P19823|ITIH2_HUMAN	Deamidation (NQ)	N6:Deamidation (NQ):1000.00
YVDVLKDSGRDYV	55.91	1527.76	13	1.3	764.887	46.48	26500000	11	F11:27598	170303_WF1_2.raw	11	11	sp|P02647|APOA1_HUMAN
SLAPYAQDTQEKLN	55.9	1576.77	14	4.3	789.397	31.33	74600	6	F6:13046	WF3_80uL_long_2.raw	2	2	sp|P06727|APOA4_HUMAN
VIHDNFGIVEGLM(+15.99)TT	55.9	1660.81	15	2.3	831.416	82.15	2570000	4	F4:44201	WF2_80uL_long_2.raw	12	12	sp|P04406|G3P_HUMAN	Oxidation (M)	M13:Oxidation (M):1000.00
TVIGPDGHKEVT	55.86	1251.65	12	2.5	626.832	11.67	3380000	9	F9:2976	WF5_80uL_long_1.raw	14	14	sp|P02671|FIBA_HUMAN
LTNAVAHVDDM(+15.99)PNAL	55.86	1595.76	15	3.2	798.89	45.31	1320000	1	F1:16924	WF1_80uL_long_1.raw	7	7	sp|P69905|HBA_HUMAN	Oxidation (M)	M11:Oxidation (M):1000.00
FQIPGYTVPV	55.85	1119.6	10	0.3	560.806	105.53	30900000	14	F14:52483	170303_WF2_2.raw	16	16	sp|P04114|APOB_HUMAN
SAFGYVFPKAV	55.84	1184.62	11	3.8	593.321	79.38	98400	11	F11:50019	170303_WF1_2.raw	1	1	sp|P04114|APOB_HUMAN
VFDKEGN(+.98)GTVM(+15.99)GAEL	55.82	1582.72	15	2.6	792.369	44.13	120000	6	F6:18615	WF3_80uL_long_2.raw	3	3	sp|P08590|MYL3_HUMAN:sp|P05976|MYL1_HUMAN	Deamidation (NQ); Oxidation (M)	N7:Deamidation (NQ):1000.00;M11:Oxidation (M):1000.00
VFDKEGN(+.98)GTVM(+15.99)GAEI	55.82	1582.72	15	2.6	792.369	44.13	120000	6	F6:18615	WF3_80uL_long_2.raw	3	3	sp|P60660|MYL6_HUMAN	Deamidation (NQ); Oxidation (M)	N7:Deamidation (NQ):1000.00;M11:Oxidation (M):1000.00
GEGPDVDVNLPK	55.81	1238.61	12	0.6	620.315	37.45	6920000	9	F9:17991	WF5_80uL_long_1.raw	10	10	sp|Q09666|AHNK_HUMAN
YYLQGAKIPKPEA	55.8	1476.8	13	1.4	739.407	33.67	22100000	16	F16:13157	170303_WF3_2.raw	9	9	sp|Q14624|ITIH4_HUMAN
SLLAYDLGLTTK	55.8	1293.72	12	-0.1	647.866	88.64	0	3	F3:58892	WF2_80uL_long_1.raw	0	0	sp|P41218|MNDA_HUMAN
HELQEKLSPLGEEM(+15.99)RD	55.8	1925.92	16	1.9	642.98	24.19	78200000	5	F5:10931	WF3_80uL_long_1.raw	17	17	sp|P02647|APOA1_HUMAN	Oxidation (M)	M14:Oxidation (M):1000.00
DGAIDLGYDLLM(+15.99)TM(+15.99)	55.8	1558.69	14	3.1	780.354	116.21	70500	3	F3:81292	WF2_80uL_long_1.raw	2	2	sp|Q13790|APOF_HUMAN	Oxidation (M)	M12:Oxidation (M):1000.00;M14:Oxidation (M):1000.00
NVHSGSTFF	55.79	994.451	9	1	498.233	27.33	350000000	18	F18:11625	170303_WF4_2.raw	13	13	sp|Q14624|ITIH4_HUMAN
VNPFRPGDSEPPPAPGAQ	55.78	1831.89	18	3.9	916.953	38.77	31700	4	F4:18782	WF2_80uL_long_2.raw	3	3	sp|Q15942|ZYX_HUMAN
DKVN(+.98)SFFSTF	55.78	1191.54	10	2.9	596.781	100.71	576000	5	F5:42344	WF3_80uL_long_1.raw	5	5	sp|P06727|APOA4_HUMAN	Deamidation (NQ)	N4:Deamidation (NQ):1000.00
SFLSALEEYTKKLN	55.77	1641.86	14	-0.5	821.938	105.86	7700000	19	F19:53606	170303_WF5_1.raw	14	14	sp|P02647|APOA1_HUMAN
GAFSDGLAHLD	55.77	1101.51	11	2.6	551.763	56.72	2540000	9	F9:26807	WF5_80uL_long_1.raw	11	11	sp|P68871|HBB_HUMAN:sp|P02042|HBD_HUMAN
SQFTLPKSVSDGIAALDLNAV	55.77	2145.13	21	-0.6	1073.57	112.02	1710000	13	F13:69746	170303_WF2_1.raw	5	5	sp|P04114|APOB_HUMAN
NKALVQQM(+15.99)EQL	55.75	1316.68	11	3.4	659.347	18.31	341000	8	F8:7356	WF4_80uL_long_2.raw	4	4	sp|P06727|APOA4_HUMAN	Oxidation (M)	M8:Oxidation (M):1000.00
SIIDELFQDR	55.74	1234.62	10	1.7	618.318	106.68	87900	15	F15:42065	170303_WF3_1.raw	3	3	sp|P10909|CLUS_HUMAN
YQGAIRQIDDIDV	55.73	1504.75	13	-1.1	753.383	63.8	12400000	9	F9:30232	WF5_80uL_long_1.raw	14	14	sp|P04114|APOB_HUMAN
SIATAFAM(+15.99)LSLGTK	55.7	1425.75	14	1	713.885	100.61	580000	13	F13:60739	170303_WF2_1.raw	8	8	sp|P01009|A1AT_HUMAN	Oxidation (M)	M8:Oxidation (M):1000.00
DVNLEGLGGKL	55.7	1113.6	11	2.5	557.81	74.7	969000	9	F9:35422	WF5_80uL_long_1.raw	11	11	sp|Q09666|AHNK_HUMAN
IDQWLEQYTQAI	55.7	1506.74	12	1	754.376	110.38	392000	9	F9:55852	WF5_80uL_long_1.raw	6	6	sp|P33241|LSP1_HUMAN
VNVDEVGGEALGR	55.69	1313.66	13	3	657.838	37.61	0	4	F4:18023	WF2_80uL_long_2.raw	0	0	sp|P68871|HBB_HUMAN
AFGFASADLI	55.68	1010.51	10	2.7	506.262	111.38	1780000	1	F1:55704	WF1_80uL_long_1.raw	9	9	sp|P04114|APOB_HUMAN
VLKPEEEAPAPEVGA	55.68	1534.79	15	0.7	768.402	29.46	1790000	5	F5:11665	WF3_80uL_long_1.raw	13	13	sp|P04004|VTNC_HUMAN
Q(+.98)LGLPGPPDVPDHA	55.67	1412.69	14	1.8	707.355	70.23	22100000	19	F19:32731	170303_WF5_1.raw	15	15	sp|Q14624|ITIH4_HUMAN	Deamidation (NQ)	Q1:Deamidation (NQ):1000.00
TYTGIFTDQVL	55.67	1256.63	11	4.4	629.324	108.06	151000	1	F1:52858	WF1_80uL_long_1.raw	4	4	sp|P02655|APOC2_HUMAN
HADSVAELGEQI	55.67	1267.6	12	0.8	634.81	47.31	1410000	16	F16:18171	170303_WF3_2.raw	6	6	sp|P12883|MYH7_HUMAN:sp|P12882|MYH1_HUMAN
VHLTPEEKTAV	55.66	1222.66	11	-0.9	408.559	12.73	41800000	11	F11:4430	170303_WF1_2.raw	25	25	sp|P02042|HBD_HUMAN
ISASAEELRQ	55.65	1102.56	10	1.5	552.289	15.26	543000	5	F5:4517	WF3_80uL_long_1.raw	2	2	sp|P06727|APOA4_HUMAN
ALVQQM(+15.99)EQLRQ	55.65	1358.7	11	0.3	680.356	16.04	4120000	5	F5:4986	WF3_80uL_long_1.raw	15	15	sp|P06727|APOA4_HUMAN	Oxidation (M)	M6:Oxidation (M):1000.00
LEDLRQGLLPVLESF	55.63	1727.95	15	2.1	864.982	115.13	3080000	9	F9:59616	WF5_80uL_long_1.raw	13	13	sp|P02647|APOA1_HUMAN
AYLVFSPSKSFV	55.62	1343.71	12	2.2	672.865	90.37	3030000	8	F8:40709	WF4_80uL_long_2.raw	17	17	sp|P01023|A2MG_HUMAN
AFVYTKNPNGYSF	55.61	1506.71	13	-2.3	754.363	61	228000	3	F3:38529	WF2_80uL_long_1.raw	2	2	sp|P04114|APOB_HUMAN
IIDELFQDRF	55.6	1294.66	10	1.4	648.336	99.14	21000	16	F16:37062	170303_WF3_2.raw	1	1	sp|P10909|CLUS_HUMAN
HGLGHGHEQQHGLGHGHKF	55.6	2068.98	19	1	414.805	9.55	37200000	16	F16:2556	170303_WF3_2.raw	6	6	sp|P01042|KNG1_HUMAN
RLLIYAVLPTGDV	55.58	1428.83	13	0.2	715.424	105.92	1250000	9	F9:52241	WF5_80uL_long_1.raw	7	7	sp|P01023|A2MG_HUMAN
SEAEDASLLSFM(+15.99)	55.57	1314.56	12	-2.6	658.288	95.57	295000	2	F2:46256	WF1_80uL_long_2.raw	6	6	sp|P02656|APOC3_HUMAN	Oxidation (M)	M12:Oxidation (M):1000.00
SGLLTSLKDNVPKATGV	55.56	1698.95	17	1.4	850.484	65.06	32000000	13	F13:37054	170303_WF2_1.raw	12	12	sp|P04114|APOB_HUMAN
SFVNDIFERI	55.56	1238.63	10	3.5	620.324	107.61	29400000	9	F9:53634	WF5_80uL_long_1.raw	20	20
ALTSELANARD	55.56	1159.58	11	3.9	580.801	21.37	222000	6	F6:8437	WF3_80uL_long_2.raw	4	4	sp|P26038|MOES_HUMAN
M(+15.99)ELERPGGNEI	55.55	1259.58	11	0.6	630.798	20.69	86800000	14	F14:9201	170303_WF2_2.raw	20	20	sp|P02671|FIBA_HUMAN	Oxidation (M)	M1:Oxidation (M):1000.00
SEKAKPALEDLR	55.54	1355.74	12	0	452.921	11.74	3740000	14	F14:3278	170303_WF2_2.raw	12	12	sp|P02647|APOA1_HUMAN
NLIGDFEVAEKI	55.53	1346.71	12	2.4	674.363	104.12	634000	3	F3:70687	WF2_80uL_long_1.raw	3	3	sp|P04114|APOB_HUMAN
AGYGINILGM(+15.99)DPL	55.53	1348.67	13	-0.3	675.342	109.71	21000	7	F7:54556	WF4_80uL_long_1.raw	1	1	sp|P02748|CO9_HUMAN	Oxidation (M)	M10:Oxidation (M):1000.00
LVEQGFTVPEIK	55.52	1358.74	12	2	680.381	70.1	56800	4	F4:36528	WF2_80uL_long_2.raw	1	1	sp|P04114|APOB_HUMAN
SLKPSEAPELDEDEG	55.5	1614.73	15	-1.2	808.369	28.6	31500	10	F10:13555	WF5_80uL_long_2.raw	2	2	sp|P33241|LSP1_HUMAN
STGKTFPGFFSPM(+15.99)LGEFVSETES	55.47	2497.14	23	0.8	1249.58	108.94	12900000	15	F15:43693	170303_WF3_1.raw	5	5	sp|P02671|FIBA_HUMAN	Oxidation (M)	M13:Oxidation (M):1000.00
ALSLAPLAGAGLELQLE	55.47	1664.93	17	1.2	833.476	116.01	710000	5	F5:51765	WF3_80uL_long_1.raw	5	5	sp|Q9ULI3|HEG1_HUMAN
SGSTGQ(+.98)WHSESGSF	55.47	1453.57	14	4.7	727.798	28.75	1080000	2	F2:10089	WF1_80uL_long_2.raw	3	3	sp|P02671|FIBA_HUMAN	Deamidation (NQ)	Q6:Deamidation (NQ):1000.00
TGTYDLKSVLGQLGITKV	55.46	1892.06	18	3.1	947.041	107.85	2840000	19	F19:55181	170303_WF5_1.raw	8	8	sp|P01009|A1AT_HUMAN
LEAIPM(+15.99)SIPPEVK	55.45	1438.77	13	2.5	720.396	56.52	13100000	9	F9:28046	WF5_80uL_long_1.raw	13	13	sp|P01009|A1AT_HUMAN	Oxidation (M)	M6:Oxidation (M):1000.00
SESGIFTN(+.98)TKE	55.44	1212.55	11	1.7	607.284	22.02	891000	16	F16:8744	170303_WF3_2.raw	3	3	sp|P02671|FIBA_HUMAN	Deamidation (NQ)	N8:Deamidation (NQ):1000.00
LQEKLSPLGEEM(+15.99)RD	55.42	1659.81	14	1	554.279	20.53	55800000	16	F16:8132	170303_WF3_2.raw	20	20	sp|P02647|APOA1_HUMAN	Oxidation (M)	M12:Oxidation (M):1000.00
TIFSTGGKDPL	55.42	1134.59	11	0.6	568.304	47.43	75800	12	F12:22642	170303_WF1_3.raw	5	5	sp|Q13177|PAK2_HUMAN
FM(+15.99)GKVVNPTQ	55.4	1135.57	10	1.2	568.793	17.61	8850000	1	F1:4247	WF1_80uL_long_1.raw	17	17	sp|P01009|A1AT_HUMAN	Oxidation (M)	M2:Oxidation (M):1000.00
NWIDSIIQR	55.39	1143.6	9	2.1	572.81	96.46	278000000	9	F9:46258	WF5_80uL_long_1.raw	22	22	sp|P08246|ELNE_HUMAN
NALWGKVNVDAV	55.36	1284.68	12	1.3	643.349	71.2	162000	3	F3:46238	WF2_80uL_long_1.raw	2	2	sp|P02042|HBD_HUMAN
TAEEWLGGR	55.35	1017.49	9	1.1	509.752	30.66	3260000	4	F4:14461	WF2_80uL_long_2.raw	6	6	sp|P31146|COR1A_HUMAN
IHWESASLL	55.34	1054.54	9	0.9	528.28	73.58	33100000	16	F16:27747	170303_WF3_2.raw	6	6	sp|P01024|CO3_HUMAN
VKIDQTVEELR	55.34	1328.73	11	1.5	665.373	27.59	2070000	8	F8:11849	WF4_80uL_long_2.raw	4	4	sp|P06727|APOA4_HUMAN
DAAM(+15.99)AGRIYI	55.34	1095.54	10	4.4	548.779	40.21	4610000	10	F10:19392	WF5_80uL_long_2.raw	11	11	sp|P04004|VTNC_HUMAN	Oxidation (M)	M4:Oxidation (M):1000.00
ALVQQM(+15.99)EQLR	55.32	1230.64	10	2.4	616.328	15.8	5780000	8	F8:5532	WF4_80uL_long_2.raw	18	18	sp|P06727|APOA4_HUMAN	Oxidation (M)	M6:Oxidation (M):1000.00
TPPVLDSDGSFFLY	55.31	1556.74	14	0.3	779.377	114.21	117000	8	F8:53903	WF4_80uL_long_2.raw	2	2	sp|P0DOX5|IGG1_HUMAN
RYTKKVPQVSTPTLVEV	55.31	1944.1	17	0.4	973.06	33.53	1230000	12	F12:16068	170303_WF1_3.raw	2	2	sp|P02768|ALBU_HUMAN
EGFLSELEPEPR	55.31	1401.68	12	2.4	701.848	82.45	953000	3	F3:54676	WF2_80uL_long_1.raw	5	5	sp|Q8IUX7|AEBP1_HUMAN
SVNDLYIQKQFPI	55.31	1563.83	13	-0.1	782.922	90.53	927000	9	F9:43520	WF5_80uL_long_1.raw	7	7	sp|P05546|HEP2_HUMAN
VIHDNFGIVEGLM(+15.99)T	55.3	1559.77	14	0.8	780.891	80.59	24600000	11	F11:51453	170303_WF1_2.raw	14	14	sp|P04406|G3P_HUMAN	Oxidation (M)	M13:Oxidation (M):1000.00
SALEYGVPVTLIGEAV	55.29	1616.87	16	1	809.441	113.54	1360000	11	F11:76950	170303_WF1_2.raw	10	10	sp|P52209|6PGD_HUMAN
KAKIDQNVEEL	55.29	1285.69	11	1.8	643.852	14.59	679000	7	F7:4996	WF4_80uL_long_1.raw	3	3	sp|P06727|APOA4_HUMAN
VADALTNAV	55.29	872.46	9	3.1	437.239	41.02	24700000	5	F5:16866	WF3_80uL_long_1.raw	13	13	sp|P69905|HBA_HUMAN
AEEWLGGRDAGPLLI	55.29	1595.83	15	2.5	798.925	103.84	112000	11	F11:68456	170303_WF1_2.raw	2	2	sp|P31146|COR1A_HUMAN
RLLLPGELAKHA	55.27	1316.79	12	0.8	439.939	24.7	8300000	11	F11:12989	170303_WF1_2.raw	13	13
DDILASPPRLPEPQP	55.27	1643.85	15	-2.9	822.931	83.99	3410000	4	F4:44995	WF2_80uL_long_2.raw	17	17	sp|P39060|COIA1_HUMAN
LSDQVPDTESETRIL	55.25	1701.84	15	-0.4	851.928	58.81	908000	6	F6:24851	WF3_80uL_long_2.raw	5	5	sp|P01024|CO3_HUMAN
FYESDVM(+15.99)GR	55.21	1118.47	9	0.1	560.242	17.76	487000	1	F1:4216	WF1_80uL_long_1.raw	4	4	sp|P01023|A2MG_HUMAN	Oxidation (M)	M7:Oxidation (M):1000.00
LELPYQGEELSM(+15.99)V	55.21	1522.72	13	4.4	762.372	102.82	136000	4	F4:56999	WF2_80uL_long_2.raw	2	2	sp|P30740|ILEU_HUMAN	Oxidation (M)	M12:Oxidation (M):1000.00
FNKPFVFL	55.21	1010.56	8	2.2	506.288	92.84	53600000	9	F9:44782	WF5_80uL_long_1.raw	15	15	sp|P01009|A1AT_HUMAN
VLPEGGETPLFKQFF	55.21	1707.89	15	1.8	854.952	107.73	54100000	5	F5:47183	WF3_80uL_long_1.raw	28	27	sp|P06396|GELS_HUMAN
VLPEGGETPIFKQFF	55.21	1707.89	15	1.8	854.952	107.73	54100000	5	F5:47183	WF3_80uL_long_1.raw	28	27
SLLPQ(+.98)LIEVSSPI	55.2	1395.79	13	-0.3	698.9	116.22	975000	18	F18:48568	170303_WF4_2.raw	8	8	sp|P04114|APOB_HUMAN	Deamidation (NQ)	Q5:Deamidation (NQ):1000.00
IVEGSDAEIGM(+15.99)	55.17	1135.51	11	1.8	568.762	24.67	0	18	F18:10251	170303_WF4_2.raw	0	0	sp|P00734|THRB_HUMAN	Oxidation (M)	M11:Oxidation (M):1000.00
WGKVNVDEVGGEALGR	55.17	1684.85	16	1.8	562.626	47.72	2840000	9	F9:22516	WF5_80uL_long_1.raw	12	12	sp|P68871|HBB_HUMAN
VAM(+15.99)SSWLQKA	55.16	1135.57	10	0.8	568.793	28.72	1810000	3	F3:15571	WF2_80uL_long_1.raw	3	3	sp|P04114|APOB_HUMAN	Oxidation (M)	M3:Oxidation (M):1000.00
IVERPLPGYPDAEAPEP	55.15	1848.93	17	3.2	925.473	59.03	8000000	9	F9:28028	WF5_80uL_long_1.raw	12	12	sp|Q6NZI2|CAVN1_HUMAN
AVAEPGIQLKAV	55.15	1194.7	12	3	598.358	43.83	858000	8	F8:19158	WF4_80uL_long_2.raw	5	5	sp|P49747|COMP_HUMAN
FDTASTGKTFPGFFSPM(+15.99)LGEFVSETESR	55.15	3087.42	28	2.2	1030.15	107.79	10600000	16	F16:42409	170303_WF3_2.raw	11	11	sp|P02671|FIBA_HUMAN	Oxidation (M)	M17:Oxidation (M):1000.00
LPEVKFPEVDVLT	55.14	1484.81	13	-1	743.413	104.28	1690000	4	F4:58176	WF2_80uL_long_2.raw	6	6	sp|P04114|APOB_HUMAN
LWGKVNVDEVGGEALG	55.13	1641.84	16	0.9	821.926	78.21	1080000	6	F6:33024	WF3_80uL_long_2.raw	4	4	sp|P68871|HBB_HUMAN
DRLDEVKEQVAEVR	55.12	1684.87	14	1.5	562.633	37.2	3490000	8	F8:16311	WF4_80uL_long_2.raw	9	9	sp|P02649|APOE_HUMAN
FVWVGKDSQEEE	55.08	1451.66	12	2.3	726.837	38.44	5170	10	F10:18402	WF5_80uL_long_2.raw	1	1	sp|P06396|GELS_HUMAN
VGEN(+.98)GYVEIEDDIGR	55.08	1664.75	15	-2.7	833.381	76.68	44000	3	F3:50048	WF2_80uL_long_1.raw	2	2	sp|P08476|INHBA_HUMAN	Deamidation (NQ)	N4:Deamidation (NQ):1000.00
GNFPWQVFT	55.07	1094.52	9	1.5	548.267	114.52	419000	1	F1:58255	WF1_80uL_long_1.raw	7	7	sp|P00736|C1R_HUMAN
GSPAINVAVHVF	55.07	1209.65	12	4.4	605.835	76.12	175000	7	F7:36507	WF4_80uL_long_1.raw	1	1	sp|P02766|TTHY_HUMAN
LEYLTAEILEL	55.05	1305.71	11	3.7	653.863	117.37	116000	3	F3:82290	WF2_80uL_long_1.raw	2	2	sp|Q6FI13|H2A2A_HUMAN:sp|O75367|H2AY_HUMAN
VLDLPDLPEDK	55.04	1252.65	11	1.1	627.335	79.49	323000	1	F1:34976	WF1_80uL_long_1.raw	11	11	sp|Q9Y4L1|HYOU1_HUMAN
DALTNAVAHVDDM(+15.99)PN	55.03	1597.7	15	4.4	799.863	64.12	281000	15	F15:24282	170303_WF3_1.raw	4	4	sp|P69905|HBA_HUMAN	Oxidation (M)	M13:Oxidation (M):1000.00
RVNEPSILEM(+15.99)S	55.02	1289.63	11	2.8	645.823	29.33	4100000	7	F7:13259	WF4_80uL_long_1.raw	6	6	sp|O14791|APOL1_HUMAN	Oxidation (M)	M10:Oxidation (M):1000.00
KILATPPQEDAPSVDIA	55.02	1763.93	17	-0.6	882.972	58.25	1360000	13	F13:32549	170303_WF2_1.raw	5	5	sp|P29401|TKT_HUMAN
AVGTSAAPVPSDN(+.98)H	55.02	1322.61	14	4.7	662.316	14.65	74800	7	F7:5035	WF4_80uL_long_1.raw	3	3	sp|P02649|APOE_HUMAN	Deamidation (NQ)	N13:Deamidation (NQ):1000.00
ARISASAEELRQ	55.02	1329.7	12	3	665.859	12.99	7050000	7	F7:3781	WF4_80uL_long_1.raw	5	5	sp|P06727|APOA4_HUMAN
SHTSDSDVPSGVTEV	55	1515.67	15	-1.2	758.841	24.43	114000	6	F6:10014	WF3_80uL_long_2.raw	3	3	sp|P10909|CLUS_HUMAN
SDFYPGAVTV	55	1054.5	10	1.6	528.257	80.44	629000	4	F4:42866	WF2_80uL_long_2.raw	5	5	sp|P0DOY3|IGLC3_HUMAN:sp|P0DOY2|IGLC2_HUMAN
NLPTLPEVKFPEV	54.98	1481.81	13	1.9	741.915	105.03	2930000	13	F13:64080	170303_WF2_1.raw	7	7	sp|P04114|APOB_HUMAN
SQTHTIRIQYSPA	54.98	1500.77	13	1.5	751.393	18.52	692000	14	F14:7886	170303_WF2_2.raw	5	5	sp|Q92954|PRG4_HUMAN
VGVEVPDVNIEGPEGK	54.98	1636.83	16	1.2	819.424	68.95	445000	3	F3:44672	WF2_80uL_long_1.raw	3	3	sp|Q09666|AHNK_HUMAN
YFVELGTQPA	54.97	1123.55	10	1.9	562.786	79.29	10400000	1	F1:34880	WF1_80uL_long_1.raw	12	12	sp|P02652|APOA2_HUMAN
SLKDYWSTV	54.97	1097.54	9	2.5	549.778	69.74	31300000	3	F3:45584	WF2_80uL_long_1.raw	17	17	sp|P02656|APOC3_HUMAN
SM(+15.99)FDQTQIQEF	54.97	1388.59	11	1.8	695.304	78.36	169000	5	F5:32635	WF3_80uL_long_1.raw	2	2	sp|Q96A32|MLRS_HUMAN	Oxidation (M)	M2:Oxidation (M):1000.00
NLPTLPEVKF	54.96	1156.65	10	2	579.333	93.32	4590000	14	F14:44811	170303_WF2_2.raw	7	7	sp|P04114|APOB_HUMAN
TFSDFQDSDLI	54.96	1286.57	11	1.7	644.292	105.96	3340000	1	F1:51086	WF1_80uL_long_1.raw	7	7	sp|P01042|KNG1_HUMAN
LLVVYPWTQRFFE	54.94	1696.9	13	2.9	849.459	111.42	465000	10	F10:62290	WF5_80uL_long_2.raw	3	3	sp|P68871|HBB_HUMAN:sp|P02042|HBD_HUMAN
SVYVYKV	54.94	856.469	7	-0.4	429.242	23.94	203000000	13	F13:12724	170303_WF2_1.raw	17	17
DLYLENPEIKI	54.94	1345.71	11	3.5	673.866	97.16	20600	10	F10:51269	WF5_80uL_long_2.raw	2	2	sp|P21980|TGM2_HUMAN
VDKDLQSLEDI	54.93	1273.64	11	0.4	637.828	66.09	548000	16	F16:24900	170303_WF3_2.raw	6	6	sp|P02679|FIBG_HUMAN
LM(+15.99)IEQNTKSPL	54.92	1288.67	11	2.3	645.344	30.54	36400000	9	F9:14815	WF5_80uL_long_1.raw	17	17	sp|P01009|A1AT_HUMAN	Oxidation (M)	M2:Oxidation (M):1000.00
GNPEQTPVLKPEEEAPAPEVGASKPEGI	54.89	2869.43	28	2.2	957.487	54.04	5360000	7	F7:25568	WF4_80uL_long_1.raw	4	4	sp|P04004|VTNC_HUMAN
GTELVN(+.98)FLSYF	54.88	1289.62	11	2.7	645.818	117.73	218000	20	F20:63144	170303_WF5_2.raw	2	2	sp|P02652|APOA2_HUMAN	Deamidation (NQ)	N6:Deamidation (NQ):1000.00
VGKVIPELN(+.98)GKLT	54.88	1367.8	13	0.2	684.909	38.63	21800000	11	F11:22331	170303_WF1_2.raw	19	19	sp|P04406|G3P_HUMAN	Deamidation (NQ)	N9:Deamidation (NQ):1000.00
DAPDVEVQGPDWHL	54.88	1576.72	14	0.9	789.366	94.8	229000	9	F9:45363	WF5_80uL_long_1.raw	4	4	sp|Q09666|AHNK_HUMAN
LLPGVGTFY	54.87	965.522	9	2.4	483.77	104.39	435000	3	F3:70931	WF2_80uL_long_1.raw	3	3	sp|Q13790|APOF_HUMAN
SKLVTDLTKV	54.86	1102.66	10	0.1	552.337	25.07	10500000	11	F11:13254	170303_WF1_2.raw	23	23	sp|P02768|ALBU_HUMAN
TIAGGGVIPHIH	54.85	1170.65	12	2.4	586.334	26.96	613000	15	F15:10727	170303_WF3_1.raw	2	2	sp|P0C0S5|H2AZ_HUMAN:sp|Q71UI9|H2AV_HUMAN
GAHAGEYGAEALE	54.84	1273.56	13	0.7	637.787	21.07	89700000	4	F4:9261	WF2_80uL_long_2.raw	9	9	sp|P69905|HBA_HUMAN
YADEFKVKI	54.84	1111.59	9	0.7	556.803	37.66	372000	16	F16:14601	170303_WF3_2.raw	2	2	sp|P06727|APOA4_HUMAN
NPGSSGTGGTATWKPGSSGP	54.83	1801.82	20	2.1	901.921	19.99	1170000	16	F16:7780	170303_WF3_2.raw	7	7	sp|P02671|FIBA_HUMAN
NAYEESLEHLETF	54.82	1580.7	13	-0.9	791.356	97.72	3120000	3	F3:65497	WF2_80uL_long_1.raw	13	13	sp|P12883|MYH7_HUMAN
M(+15.99)LGEFVSETES	54.8	1243.53	11	1.5	622.772	53.88	3300000	15	F15:20584	170303_WF3_1.raw	8	8	sp|P02671|FIBA_HUMAN	Oxidation (M)	M1:Oxidation (M):1000.00
VDVEVPDVSLEGPEGKL	54.8	1780.91	17	3	891.465	97.45	900000	10	F10:51570	WF5_80uL_long_2.raw	7	7	sp|Q09666|AHNK_HUMAN
GPLVEQGRV	54.8	953.529	9	-0.3	477.772	15.4	13500000	8	F8:5286	WF4_80uL_long_2.raw	15	15	sp|P02649|APOE_HUMAN
TASTGKTFPGFFSPM(+15.99)L	54.79	1703.82	16	2.3	852.921	98.99	1380000	6	F6:42012	WF3_80uL_long_2.raw	7	7	sp|P02671|FIBA_HUMAN	Oxidation (M)	M15:Oxidation (M):1000.00
NVKENIQDNI	54.78	1185.6	10	1.7	593.808	21.38	1880000	9	F9:9668	WF5_80uL_long_1.raw	4	4	sp|P19823|ITIH2_HUMAN
VLKVFLENVI	54.76	1172.72	10	1.4	587.366	102.15	130000	6	F6:43794	WF3_80uL_long_2.raw	4	4	sp|P62805|H4_HUMAN
IEFSKEQQDEF	54.75	1398.63	11	2.3	700.324	42.72	336000	3	F3:25468	WF2_80uL_long_1.raw	1	1	sp|P05976|MYL1_HUMAN
GRLTPYADEFKV	54.75	1394.72	12	1.3	465.914	50.23	4930000	8	F8:22214	WF4_80uL_long_2.raw	8	8	sp|P06727|APOA4_HUMAN
KIDQTVEELR	54.75	1229.66	10	-1.8	615.837	16.11	2740000	11	F11:6827	170303_WF1_2.raw	8	8	sp|P06727|APOA4_HUMAN
SLAELGGHLDQ	54.75	1138.56	11	0.9	570.289	37.12	168000000	17	F17:15753	170303_WF4_1.raw	19	19	sp|P06727|APOA4_HUMAN
EGGETPLFKQFF	54.74	1398.68	12	1.6	700.349	104.11	14300000	10	F10:56286	WF5_80uL_long_2.raw	19	19	sp|P06396|GELS_HUMAN
EGGETPIFKQFF	54.74	1398.68	12	1.6	700.349	104.11	14300000	10	F10:56286	WF5_80uL_long_2.raw	19	19
SLAALKKALAAAGYDVEK	54.72	1818.03	18	0.3	607.016	76.42	15000	13	F13:44106	170303_WF2_1.raw	1	1	sp|P16403|H12_HUMAN:sp|P10412|H14_HUMAN:sp|P16402|H13_HUMAN
SSSHHPGIAEFPS	54.72	1351.62	13	1.9	676.816	17.31	40500000	8	F8:6732	WF4_80uL_long_2.raw	15	15	sp|P02671|FIBA_HUMAN
VLDLPDLPEDKLA	54.71	1436.78	13	2.9	719.398	98.9	2940000	8	F8:44369	WF4_80uL_long_2.raw	13	13	sp|Q9Y4L1|HYOU1_HUMAN
TLSLPELEQQ	54.71	1156.6	10	1.9	579.307	83.85	36400000	4	F4:45198	WF2_80uL_long_2.raw	16	16	sp|P06727|APOA4_HUMAN
SAKAGVIFPV	54.7	987.575	10	0.8	494.795	47.25	63700000	20	F20:21650	170303_WF5_2.raw	18	18	sp|O75367|H2AY_HUMAN
DLATVYVDVLK	54.7	1234.68	11	2.6	618.349	102.61	12500	4	F4:56834	WF2_80uL_long_2.raw	1	1	sp|P02647|APOA1_HUMAN
LNYKPEEEYPDLS	54.7	1595.74	13	4.3	798.878	51.69	11000000	4	F4:25499	WF2_80uL_long_2.raw	14	14	sp|P06732|KCRM_HUMAN
M(+15.99)ALQEASEAYLV	54.69	1339.63	12	1.1	670.824	81.7	13500000	1	F1:36337	WF1_80uL_long_1.raw	10	10	sp|Q71DI3|H32_HUMAN	Oxidation (M)	M1:Oxidation (M):1000.00
NSFVNDIFER	54.67	1239.59	10	1.9	620.803	79.16	704000	6	F6:33373	WF3_80uL_long_2.raw	6	6
SSKAM(+15.99)GIM(+15.99)NSFVNDIFERI	54.66	2190.04	19	4.1	731.025	104.13	9250000	9	F9:50762	WF5_80uL_long_1.raw	9	9		Oxidation (M)	M5:Oxidation (M):1000.00;M8:Oxidation (M):1000.00
VFLM(+15.99)IEQNTKSPLFM(+15.99)GKVVNPTQ	54.63	2652.37	23	3.2	885.132	81.85	14600000	19	F19:39033	170303_WF5_1.raw	6	6	sp|P01009|A1AT_HUMAN	Oxidation (M)	M4:Oxidation (M):1000.00;M15:Oxidation (M):1000.00
VLEYLTAEILELAGNAARDN	54.62	2174.12	20	3.4	725.717	117.56	1020000	1	F1:60744	WF1_80uL_long_1.raw	5	5	sp|Q6FI13|H2A2A_HUMAN:sp|O75367|H2AY_HUMAN
SFLPKELAAQTI	54.6	1316.73	12	0.8	659.375	81.21	138000	12	F12:40871	170303_WF1_3.raw	3	3	sp|P19827|ITIH1_HUMAN
SGKYDLDF	54.6	943.429	8	1.3	472.722	44.73	23000000	20	F20:20405	170303_WF5_2.raw	12	12	sp|P06733|ENOA_HUMAN
STAAM(+15.99)STYTGIFTDQVLSVLKGEE	54.59	2563.24	24	3.2	1282.63	114.15	16200000	18	F18:47368	170303_WF4_2.raw	13	13	sp|P02655|APOC2_HUMAN	Oxidation (M)	M5:Oxidation (M):1000.00
VHASLDKFLASVSTVLTSKYR	54.59	2321.27	21	3.5	774.768	102.25	10600000	11	F11:67061	170303_WF1_2.raw	8	8	sp|P69905|HBA_HUMAN
VYELNPLDHR	54.58	1254.64	10	2	628.326	31.93	2310000	14	F14:15128	170303_WF2_2.raw	4	4
AFSATRTI	54.58	865.466	8	0.8	433.74	17.28	484000000	8	F8:6547	WF4_80uL_long_2.raw	24	24	sp|P02746|C1QB_HUMAN
ADADADLEERL	54.57	1216.56	11	2.3	609.287	42.5	543000	9	F9:20210	WF5_80uL_long_1.raw	4	4	sp|O43633|CHM2A_HUMAN
TGLEPGTEYTIYVI	54.57	1554.78	14	3.8	778.401	110.39	20500000	17	F17:45833	170303_WF4_1.raw	13	13	sp|P02751|FINC_HUMAN
YGAEALERM(+15.99)	54.55	1054.48	9	-0.1	528.245	16.68	14900000	11	F11:7236	170303_WF1_2.raw	7	7	sp|P69905|HBA_HUMAN	Oxidation (M)	M9:Oxidation (M):1000.00
ELGGHLDQQV	54.54	1094.54	10	0.5	548.275	22.05	183000000	11	F11:11325	170303_WF1_2.raw	13	13	sp|P06727|APOA4_HUMAN
LLSEPINIIDALEM(+15.99)R	54.54	1741.93	15	3.4	581.652	111.4	506000	2	F2:58046	WF1_80uL_long_2.raw	9	9	sp|P04114|APOB_HUMAN	Oxidation (M)	M14:Oxidation (M):1000.00
AFFDTASTGK	54.52	1043.49	10	1.4	522.754	26.57	1590000	15	F15:10567	170303_WF3_1.raw	8	8	sp|P02671|FIBA_HUMAN
DIDTPDIDIHGPEG	54.51	1492.67	14	3.5	747.344	71.14	24900	9	F9:33714	WF5_80uL_long_1.raw	2	2	sp|Q09666|AHNK_HUMAN
LFVEPILEVS	54.5	1144.64	10	3.1	573.328	109.38	164000	7	F7:54340	WF4_80uL_long_1.raw	4	4	sp|P05155|IC1_HUMAN
STGKTFPGFFSPM(+15.99)LGEF	54.5	1864.87	17	3.9	933.446	107.8	14300000	3	F3:74030	WF2_80uL_long_1.raw	14	14	sp|P02671|FIBA_HUMAN	Oxidation (M)	M13:Oxidation (M):1000.00
GSESGIFTN(+.98)TK	54.49	1140.53	11	1.3	571.273	19.81	3120000	3	F3:8777	WF2_80uL_long_1.raw	3	3	sp|P02671|FIBA_HUMAN	Deamidation (NQ)	N9:Deamidation (NQ):1000.00
FELM(+15.99)DDYHFT	54.48	1332.53	10	3.4	667.276	75.34	388000	10	F10:38481	WF5_80uL_long_2.raw	4	4	sp|P41218|MNDA_HUMAN	Oxidation (M)	M4:Oxidation (M):1000.00
TSLEVSPNPEPPEKPV	54.48	1718.87	16	3.8	860.447	37.62	199000	16	F16:14584	170303_WF3_2.raw	7	7	sp|Q9UBW5|BIN2_HUMAN
FFGHGAEDSLADQAANEWG	54.48	2020.86	19	-0.8	1011.43	92.29	3040000	6	F6:39114	WF3_80uL_long_2.raw	9	9	sp|P0DJI8|SAA1_HUMAN
DLGIEIPAEKV	54.47	1182.65	11	-0.3	592.332	79.34	3220000	13	F13:45795	170303_WF2_1.raw	7	7	sp|P14618|KPYM_HUMAN
SVYVYKVLKQVHPDTGISSK	54.46	2247.23	20	2.8	750.085	38.12	49400000	13	F13:21125	170303_WF2_1.raw	6	6
FFTREPQDT	54.45	1139.52	9	0.4	570.77	18.88	31300000	3	F3:8277	WF2_80uL_long_1.raw	12	12	sp|P10909|CLUS_HUMAN
ERVNEPSILEM(+15.99)S	54.44	1418.67	12	-0.1	710.343	34.84	3420000	8	F8:15259	WF4_80uL_long_2.raw	14	14	sp|O14791|APOL1_HUMAN	Oxidation (M)	M11:Oxidation (M):1000.00
LSPLGEEM(+15.99)RD	54.44	1161.53	10	1.2	581.775	17.36	23600000	13	F13:7592	170303_WF2_1.raw	19	19	sp|P02647|APOA1_HUMAN	Oxidation (M)	M8:Oxidation (M):1000.00
TFNTSTGGLLLPSDTK	54.44	1650.85	16	-4.9	826.427	65.94	393000	3	F3:42245	WF2_80uL_long_1.raw	4	4	sp|P12956|XRCC6_HUMAN
MALQEASEAYLV	54.43	1323.64	12	1.5	662.827	98.19	245000	3	F3:65911	WF2_80uL_long_1.raw	1	1	sp|Q71DI3|H32_HUMAN
VFLENVIRDAVTY	54.43	1537.81	13	-0.7	769.914	108.83	5340000	13	F13:67172	170303_WF2_1.raw	11	11	sp|P62805|H4_HUMAN
LWGKVNVDEV	54.42	1157.61	10	-0.1	579.811	54.64	17000000	12	F12:26352	170303_WF1_3.raw	16	16	sp|P68871|HBB_HUMAN
SLM(+15.99)PFSPYEPLNFHA	54.42	1764.82	15	-1.7	883.415	105.78	16300000	1	F1:50957	WF1_80uL_long_1.raw	17	17	sp|P10909|CLUS_HUMAN	Oxidation (M)	M3:Oxidation (M):1000.00
YFQTVTDYGKDLM(+15.99)E	54.41	1724.76	14	3.3	863.39	67.84	90600	8	F8:30510	WF4_80uL_long_2.raw	3	3	sp|P02652|APOA2_HUMAN	Oxidation (M)	M13:Oxidation (M):1000.00
TAGYGINILGM(+15.99)DPLSTPF	54.41	1881.92	18	1.7	941.968	116.17	547000	7	F7:58644	WF4_80uL_long_1.raw	2	2	sp|P02748|CO9_HUMAN	Oxidation (M)	M11:Oxidation (M):1000.00
YLTSYQPPQNPYYYVDGD	54.41	2181.95	18	2.8	1091.99	103.92	2340000	15	F15:40235	170303_WF3_1.raw	10	10	sp|Q06033|ITIH3_HUMAN
SLAELGGHLD	54.4	1010.5	10	2.5	506.26	46.48	80900000	1	F1:17642	WF1_80uL_long_1.raw	13	13	sp|P06727|APOA4_HUMAN
TDYGKDLM(+15.99)E	54.4	1086.45	9	0.7	544.235	17.02	29400000	20	F20:6510	170303_WF5_2.raw	10	10	sp|P02652|APOA2_HUMAN	Oxidation (M)	M8:Oxidation (M):1000.00
DNLEKETEGL	54.39	1146.54	10	0.9	574.278	32	670000	10	F10:15291	WF5_80uL_long_2.raw	4	4	sp|P02647|APOA1_HUMAN
SHHPGIAEFPSR	54.38	1333.65	12	-0.2	445.558	12.44	10600000	14	F14:3844	170303_WF2_2.raw	3	3	sp|P02671|FIBA_HUMAN
NSLFFSAQPFEI	54.38	1398.68	12	2	700.35	116.26	82700	4	F4:67215	WF2_80uL_long_2.raw	2	2	sp|P04114|APOB_HUMAN
VLEYLTAEIL	54.37	1162.65	10	2.3	582.333	112.83	3600000	19	F19:59079	170303_WF5_1.raw	15	15	sp|Q6FI13|H2A2A_HUMAN:sp|O75367|H2AY_HUMAN
EAFLSSLTETI	54.37	1209.61	11	3	605.816	110.91	705000	16	F16:44448	170303_WF3_2.raw	7	7	sp|P00751|CFAB_HUMAN
KLGPHAGDVEGHL	54.37	1328.68	13	-0.1	443.902	12.69	5610000	11	F11:4174	170303_WF1_2.raw	3	3	sp|P06727|APOA4_HUMAN
GPHAGDVEGHLSF	54.37	1321.61	13	1.6	661.811	29.41	7160000	8	F8:12584	WF4_80uL_long_2.raw	12	12	sp|P06727|APOA4_HUMAN
TFQIPGYTVPV	54.36	1220.64	11	-3.7	611.327	106.64	148000000	15	F15:42029	170303_WF3_1.raw	14	14	sp|P04114|APOB_HUMAN
GFELM(+15.99)DDYHFT	54.35	1389.55	11	1.3	695.785	79.94	1020000	10	F10:41353	WF5_80uL_long_2.raw	10	10	sp|P41218|MNDA_HUMAN	Oxidation (M)	M5:Oxidation (M):1000.00
LLSLKPSEAPELDEDEGFGDWSQRPEQ	54.33	3071.44	27	-1.9	1024.82	98.68	1320000	8	F8:44135	WF4_80uL_long_2.raw	6	6	sp|P33241|LSP1_HUMAN
TLLSALVETRTI	54.32	1315.77	12	2	658.894	104.32	203000	2	F2:52079	WF1_80uL_long_2.raw	2	2	sp|P01011|AACT_HUMAN
YGAEALERM(+15.99)F	54.32	1201.54	10	2.1	601.78	54.07	1330000	5	F5:22317	WF3_80uL_long_1.raw	12	12	sp|P69905|HBA_HUMAN	Oxidation (M)	M9:Oxidation (M):1000.00
GKVNVDEVGGEAL	54.31	1285.65	13	2.7	643.835	32.63	35800	7	F7:14719	WF4_80uL_long_1.raw	2	2	sp|P68871|HBB_HUMAN
IGDEAIEKPTYA	54.3	1305.65	12	3.6	653.832	29.59	190000	3	F3:16166	WF2_80uL_long_1.raw	2	2	sp|P61158|ARP3_HUMAN
VIHDNFGIVEGLM(+15.99)TTV	54.29	1759.88	16	-2.6	880.946	100.24	2070000	15	F15:38061	170303_WF3_1.raw	13	13	sp|P04406|G3P_HUMAN	Oxidation (M)	M13:Oxidation (M):1000.00
ALVEQGFTVPEIKTI	54.29	1643.91	15	-0.4	822.964	100.51	335000	4	F4:55270	WF2_80uL_long_2.raw	4	4	sp|P04114|APOB_HUMAN
TLSLPELEQQ(+.98)QE	54.28	1414.68	12	1.8	708.35	85.87	2510000	19	F19:41402	170303_WF5_1.raw	9	9	sp|P06727|APOA4_HUMAN	Deamidation (NQ)	Q10:Deamidation (NQ):12.28
VPPLIPPKIPEG	54.28	1255.75	12	1.9	628.885	66.61	280000	9	F9:32246	WF5_80uL_long_1.raw	2	2	sp|P13805|TNNT1_HUMAN
TFQIPGYTVPVV	54.28	1319.71	12	0.6	660.864	109.43	6140000	13	F13:67652	170303_WF2_1.raw	11	11	sp|P04114|APOB_HUMAN
LQDFFN(+.98)GKELN	54.27	1324.63	11	-0.9	663.322	65.71	704000	4	F4:33758	WF2_80uL_long_2.raw	8	8	sp|P11142|HSP7C_HUMAN	Deamidation (NQ)	N6:Deamidation (NQ):22.08
SWFEPLVEDM(+15.99)QRQWA	54.26	1936.88	15	3	969.449	106.13	8340000	13	F13:64983	170303_WF2_1.raw	14	14	sp|P02649|APOE_HUMAN	Oxidation (M)	M10:Oxidation (M):1000.00
GLVEKVQAAVGTSAAPVPSDNH	54.26	2146.1	22	3.7	1074.06	61.54	43000000	7	F7:29299	WF4_80uL_long_1.raw	10	10	sp|P02649|APOE_HUMAN
LEEYTKKLNTQ	54.25	1365.71	11	1.8	683.865	12.61	685000	14	F14:3952	170303_WF2_2.raw	4	4	sp|P02647|APOA1_HUMAN
LREQLGPVTQEF	54.24	1415.74	12	2.4	708.879	59.45	873000	9	F9:28230	WF5_80uL_long_1.raw	3	3	sp|P02647|APOA1_HUMAN
PYM(+15.99)KLAPGELTIIL	54.23	1573.88	14	2.2	787.948	101.88	1060000	7	F7:49127	WF4_80uL_long_1.raw	5	5	sp|P04114|APOB_HUMAN	Oxidation (M)	M3:Oxidation (M):1000.00
GEALGHGLGDAL	54.22	1108.55	12	1.5	555.284	44.48	432000	5	F5:18185	WF3_80uL_long_1.raw	5	5	sp|Q6E0U4|DMKN_HUMAN
YQKVVAGVANA	54.21	1118.61	11	4.1	560.314	14.82	19100	11	F11:5877	170303_WF1_2.raw	1	1	sp|P68871|HBB_HUMAN:sp|P02042|HBD_HUMAN
NVHSGSTFFKYYLQGAKIPKPEA	54.21	2581.33	23	2.3	646.342	64.23	11700000	16	F16:24490	170303_WF3_2.raw	4	4	sp|Q14624|ITIH4_HUMAN
EAIPM(+15.99)SIPPEVKF	54.21	1472.76	13	3.2	737.389	79.9	5010000	9	F9:39436	WF5_80uL_long_1.raw	9	9	sp|P01009|A1AT_HUMAN	Oxidation (M)	M5:Oxidation (M):1000.00
TLSGIGTLDG	54.2	932.481	10	2.1	467.249	53.66	883000	5	F5:22156	WF3_80uL_long_1.raw	3	3	sp|P02671|FIBA_HUMAN
N(+.98)HGIGQAGKEAEKL	54.2	1451.74	14	-2.7	726.874	13.02	6450000	7	F7:3807	WF4_80uL_long_1.raw	8	8	sp|Q6UWP8|SBSN_HUMAN	Deamidation (NQ)	N1:Deamidation (NQ):76.42
SVLGQLGITKVFSN(+.98)GADLSGV	54.19	2062.09	21	-1.4	1032.05	111.35	44800	6	F6:49953	WF3_80uL_long_2.raw	1	1	sp|P01009|A1AT_HUMAN	Deamidation (NQ)	N14:Deamidation (NQ):114.67
DSLQASLRPHADE	54.19	1437.68	13	2.3	719.851	19.39	4840000	8	F8:7806	WF4_80uL_long_2.raw	6	6	sp|P06727|APOA4_HUMAN
VLPGVDALSNI	54.19	1096.61	11	3	549.315	104.71	6940	7	F7:51073	WF4_80uL_long_1.raw	1	1	sp|P00558|PGK1_HUMAN
SGVLPGGGFVASAAAV	54.19	1358.72	16	0.3	680.367	99.36	242000	8	F8:44527	WF4_80uL_long_2.raw	5	5	sp|Q12805|FBLN3_HUMAN
AVLDVFEEGTEA	54.19	1278.6	12	2.7	640.308	101.57	461000	2	F2:49969	WF1_80uL_long_2.raw	5	5	sp|P01011|AACT_HUMAN
FEFPVGDAV	54.17	979.465	9	1.5	490.74	102.58	1840000	3	F3:69360	WF2_80uL_long_1.raw	4	4
LLFKGSEM(+15.99)VVAG	54.16	1265.67	12	1.8	633.843	42.68	14700000	8	F8:18947	WF4_80uL_long_2.raw	6	6	sp|Q14624|ITIH4_HUMAN	Oxidation (M)	M8:Oxidation (M):1000.00
MELERPGGN(+.98)EIT	54.16	1345.62	12	-0.4	673.816	39.2	281000	4	F4:18806	WF2_80uL_long_2.raw	2	2	sp|P02671|FIBA_HUMAN	Deamidation (NQ)	N9:Deamidation (NQ):1000.00
KIVLDPSGSM(+15.99)NIYL	54.14	1564.82	14	2.7	783.418	79.89	1380000	9	F9:38415	WF5_80uL_long_1.raw	8	8	sp|P00751|CFAB_HUMAN	Oxidation (M)	M10:Oxidation (M):1000.00
ELERPGGN(+.98)EI	54.14	1113.53	10	2.2	557.774	25.15	113000000	9	F9:12578	WF5_80uL_long_1.raw	14	14	sp|P02671|FIBA_HUMAN	Deamidation (NQ)	N8:Deamidation (NQ):1000.00
NTPFLNIDKL	54.14	1173.64	10	2	587.828	84.93	7880000	7	F7:41386	WF4_80uL_long_1.raw	6	6	sp|P60985|KTDAP_HUMAN
DSPGNKDFLQSL	54.13	1319.64	12	2.1	660.827	77.19	10800000	6	F6:32631	WF3_80uL_long_2.raw	6	6	sp|P08697|A2AP_HUMAN
IQLVEEELDR	54.12	1242.65	10	-2.5	622.328	49.61	3510000	10	F10:23606	WF5_80uL_long_2.raw	17	17	sp|P07951|TPM2_HUMAN:sp|P09493|TPM1_HUMAN
IEGVDAEDGHGPGEQQ	54.12	1636.7	16	1	819.356	16.76	32800	9	F9:6741	WF5_80uL_long_1.raw	3	3	sp|P00751|CFAB_HUMAN
VLDVFEEGTEA	54.11	1207.56	11	1.8	604.789	83.95	335000	10	F10:43857	WF5_80uL_long_2.raw	4	4	sp|P01011|AACT_HUMAN
KEGEEADAPGVIPGIVGAV	54.1	1806.94	19	0.5	904.476	90.35	5370000	16	F16:34014	170303_WF3_2.raw	7	7	sp|P14209|CD99_HUMAN
LISWYDNEFGYSN	54.1	1606.69	13	2.3	804.356	108.87	1980000	11	F11:72886	170303_WF1_2.raw	5	5	sp|P04406|G3P_HUMAN
LGYTEHQVV	54.06	1044.52	9	0.8	523.27	27.38	19600000	1	F1:8315	WF1_80uL_long_1.raw	11	11	sp|P04406|G3P_HUMAN
GLQFPVGR	54.06	872.487	8	1.4	437.251	36.46	49300000	17	F17:15500	170303_WF4_1.raw	14	14	sp|Q6FI13|H2A2A_HUMAN:sp|P0C0S5|H2AZ_HUMAN:sp|Q71UI9|H2AV_HUMAN
SEHPGLSIGDTA	54.05	1182.55	12	3	592.285	23.49	1110000	9	F9:10846	WF5_80uL_long_1.raw	4	4	sp|P26583|HMGB2_HUMAN
AGTELVNFLSYF	54.02	1359.67	12	4.9	680.846	117.65	1180000	9	F9:61651	WF5_80uL_long_1.raw	7	7	sp|P02652|APOA2_HUMAN
IHWESASLLR	54.01	1210.65	10	0.7	606.331	43.07	5200000	16	F16:16541	170303_WF3_2.raw	7	7	sp|P01024|CO3_HUMAN
DIQM(+15.99)TQSPSTLSASVGDRVTI	54.01	2221.09	21	2.1	1111.55	77.97	81700	11	F11:49163	170303_WF1_2.raw	3	3	sp|P01602|KV105_HUMAN	Oxidation (M)	M4:Oxidation (M):1000.00
VFDVQIPKGAFI	53.99	1332.74	12	1	667.38	104.04	1010000	13	F13:63221	170303_WF2_1.raw	6	6	sp|P19823|ITIH2_HUMAN
SGSFRPDSPGSGNA	53.97	1334.59	14	1.4	668.301	13.15	14800	5	F5:3285	WF3_80uL_long_1.raw	1	1	sp|P02671|FIBA_HUMAN
ILENKEGLELL	53.96	1269.72	11	2.2	635.868	76.46	3780000	3	F3:49869	WF2_80uL_long_1.raw	7	7	sp|P06733|ENOA_HUMAN
TGIFTDQVLSVL	53.95	1291.7	12	0.6	646.859	115.91	20200000	18	F18:48408	170303_WF4_2.raw	19	19	sp|P02655|APOC2_HUMAN
PTLPEVKFPEVDVL	53.94	1581.87	14	2.1	791.942	107.53	449000	4	F4:60873	WF2_80uL_long_2.raw	2	2	sp|P04114|APOB_HUMAN
IPM(+15.99)SIPPEVKFNKPFVF	53.93	2005.07	17	1.4	669.366	98.51	0	3	F3:66927	WF2_80uL_long_1.raw	0	0	sp|P01009|A1AT_HUMAN	Oxidation (M)	M3:Oxidation (M):1000.00
SKGPLDQLE	53.92	985.508	9	1.1	493.762	27.6	31500000	16	F16:11151	170303_WF3_2.raw	18	18	sp|P05546|HEP2_HUMAN
SEGPLKGILGYTEHQV	53.92	1726.89	16	3.1	576.639	72.72	2050000	12	F12:35912	170303_WF1_3.raw	6	6	sp|P04406|G3P_HUMAN
FTREPQDTY	53.91	1155.52	9	1.7	578.768	14.95	2130000	3	F3:4918	WF2_80uL_long_1.raw	4	4	sp|P10909|CLUS_HUMAN
PGSPRPGSTGTWNPGSSE	53.9	1769.8	18	2.1	885.908	21.37	26900000	6	F6:8590	WF3_80uL_long_2.raw	11	11	sp|P02671|FIBA_HUMAN
YLAAVLEYLTAEI	53.89	1467.79	13	3.8	734.903	117.88	225000	1	F1:61062	WF1_80uL_long_1.raw	2	2
GLGLSYLSSHIANVER	53.88	1714.9	16	0.4	572.641	73.92	1050000	16	F16:27657	170303_WF3_2.raw	3	3	sp|P06396|GELS_HUMAN
NHGIGQAGKEAEKL	53.88	1450.75	14	1.7	726.385	11.2	7100000	15	F15:2608	170303_WF3_1.raw	15	15	sp|Q6UWP8|SBSN_HUMAN
TLSLPELEQQQ(+.98)E	53.87	1414.68	12	4	708.351	85.98	937000	10	F10:45246	WF5_80uL_long_2.raw	5	5	sp|P06727|APOA4_HUMAN	Deamidation (NQ)	Q11:Deamidation (NQ):17.01
ALVLIAFAQY	53.85	1107.63	10	3	554.825	114.32	133000	10	F10:64647	WF5_80uL_long_2.raw	3	3	sp|P02768|ALBU_HUMAN
SAFGYVFPK	53.85	1014.52	9	3.3	508.268	60.91	240000	4	F4:30854	WF2_80uL_long_2.raw	5	5	sp|P04114|APOB_HUMAN
NNLLQAELEEL	53.83	1284.66	11	0.6	643.336	112.13	147000	6	F6:50404	WF3_80uL_long_2.raw	3	3	sp|P12883|MYH7_HUMAN
TILGTM(+15.99)PAFEV	53.83	1193.6	11	0.4	597.808	102.96	761000	1	F1:48851	WF1_80uL_long_1.raw	6	6	sp|P04114|APOB_HUMAN	Oxidation (M)	M6:Oxidation (M):1000.00
VTIAQGGVLPNIQAVLLPK	53.8	1930.16	19	-2.4	966.086	108.24	795000	6	F6:48069	WF3_80uL_long_2.raw	5	5	sp|Q6FI13|H2A2A_HUMAN
AFFDTASTGKTFPG	53.78	1445.68	14	2.7	723.851	68.64	3770000	15	F15:25944	170303_WF3_1.raw	5	5	sp|P02671|FIBA_HUMAN
GEFVSETESRGSESGIF	53.78	1816.81	17	4	909.417	62.77	193000	8	F8:28129	WF4_80uL_long_2.raw	2	2	sp|P02671|FIBA_HUMAN
SLAELGGHL	53.77	895.476	9	0.7	448.746	41.98	371000000	14	F14:19765	170303_WF2_2.raw	19	19	sp|P06727|APOA4_HUMAN
AHYDLRHTFM(+15.99)GVVSLGSPSGEVSHPR	53.76	2851.38	26	0.2	713.853	54.15	3700000	17	F17:22336	170303_WF4_1.raw	5	5	sp|P02765|FETUA_HUMAN	Oxidation (M)	M10:Oxidation (M):1000.00
VEPYGENFN	53.75	1067.46	9	1.7	534.736	36.48	2670000	5	F5:14680	WF3_80uL_long_1.raw	3	3	sp|P06727|APOA4_HUMAN
TIFQERDPS	53.75	1091.52	9	2.1	546.771	18.18	38100000	10	F10:7587	WF5_80uL_long_2.raw	8	8	sp|P04406|G3P_HUMAN
PNNPDWGTFEE	53.74	1304.53	11	2.6	653.274	71.56	6660000	6	F6:30481	WF3_80uL_long_2.raw	4	4	sp|P02671|FIBA_HUMAN
SSDFN(+.98)SDTHSSTF	53.74	1431.54	13	0.7	716.779	27.45	240000	10	F10:12886	WF5_80uL_long_2.raw	4	4	sp|P04406|G3P_HUMAN	Deamidation (NQ)	N5:Deamidation (NQ):1000.00
VDVDVPDVNIEGPDA	53.71	1552.73	15	-2.4	777.368	95.46	584000	10	F10:50279	WF5_80uL_long_2.raw	7	7	sp|Q09666|AHNK_HUMAN
SLPELEQQQE	53.71	1199.57	10	2.5	600.792	39.78	71700000	9	F9:19131	WF5_80uL_long_1.raw	20	20	sp|P06727|APOA4_HUMAN
FELPTGAGLQLQI	53.71	1385.76	13	-0.1	693.885	113.92	29300	2	F2:60140	WF1_80uL_long_2.raw	2	2	sp|P04114|APOB_HUMAN
NEKLSQLQTY	53.7	1222.62	10	1	612.318	26.51	265000	3	F3:13900	WF2_80uL_long_1.raw	2	2	sp|P04114|APOB_HUMAN
LTNAVAHVDDM(+15.99)PNA	53.69	1482.68	14	0.8	742.346	18.41	2150000	6	F6:6761	WF3_80uL_long_2.raw	7	7	sp|P69905|HBA_HUMAN	Oxidation (M)	M11:Oxidation (M):1000.00
KVEQAVETEPEPELRQQT	53.68	2110.05	18	0.5	704.359	20.03	10200000	4	F4:8021	WF2_80uL_long_2.raw	8	8	sp|P02649|APOE_HUMAN
SEGLPALEFPNE	53.67	1301.61	12	1.1	651.815	103.1	1300000	9	F9:49960	WF5_80uL_long_1.raw	8	8	sp|P02748|CO9_HUMAN
GGEALGRLLVVYPWTQRF	53.66	2061.12	18	1.4	688.047	106.86	10200000	10	F10:58585	WF5_80uL_long_2.raw	13	13	sp|P68871|HBB_HUMAN:sp|P02042|HBD_HUMAN
DDLQAEEDKV	53.65	1160.52	10	2.5	581.269	26.57	1730000	3	F3:13944	WF2_80uL_long_1.raw	5	5	sp|P12883|MYH7_HUMAN:sp|P12882|MYH1_HUMAN
GEGDFLAEGGGV	53.65	1106.49	12	0.9	554.252	72	4030000	5	F5:30127	WF3_80uL_long_1.raw	12	12	sp|P02671|FIBA_HUMAN
KVEAPPAKVPEVPK	53.65	1487.87	14	1	496.965	13.71	4180000	14	F14:4779	170303_WF2_2.raw	9	9	sp|Q8WZ42|TITIN_HUMAN
VHLTPEEKSAVTALWGK	53.63	1865	17	1.6	622.677	60.13	1240000	6	F6:25733	WF3_80uL_long_2.raw	5	5	sp|P68871|HBB_HUMAN
SERLEEAGGATSV	53.62	1304.62	13	2	653.319	16.39	64200	5	F5:5139	WF3_80uL_long_1.raw	3	3	sp|P12883|MYH7_HUMAN
NVDEVGGEALGRL	53.62	1327.67	13	3.4	664.846	58.08	120000	8	F8:25673	WF4_80uL_long_2.raw	2	2	sp|P68871|HBB_HUMAN
VTEEAPLKLS	53.61	1085.6	10	0.1	543.806	28.06	167000	9	F9:13380	WF5_80uL_long_1.raw	2	2	sp|P01009|A1AT_HUMAN
ILEYLTAEVL	53.61	1162.65	10	0.1	582.332	112.21	12900	14	F14:57556	170303_WF2_2.raw	1	1	sp|P0C0S5|H2AZ_HUMAN:sp|Q71UI9|H2AV_HUMAN
VSGLM(+15.99)VATKYEV	53.6	1311.67	12	0.8	656.845	48.97	329000	3	F3:29776	WF2_80uL_long_1.raw	1	1	sp|P02751|FINC_HUMAN	Oxidation (M)	M5:Oxidation (M):1000.00
SESGIFTN(+.98)TK	53.6	1083.51	10	1.9	542.763	19.24	818000	4	F4:7519	WF2_80uL_long_2.raw	7	7	sp|P02671|FIBA_HUMAN	Deamidation (NQ)	N8:Deamidation (NQ):1000.00
TVGSLAGQPLQER	53.6	1354.72	13	0.8	678.368	24.74	63400	8	F8:10604	WF4_80uL_long_2.raw	2	2	sp|P02649|APOE_HUMAN
FNKPFVFLM(+15.99)IEQNT	53.6	1742.87	14	0.3	872.443	102.25	5650000	6	F6:43867	WF3_80uL_long_2.raw	6	6	sp|P01009|A1AT_HUMAN	Oxidation (M)	M9:Oxidation (M):1000.00
GDYDVTVPK	53.59	992.481	9	0.9	497.248	25.88	69600	1	F1:7235	WF1_80uL_long_1.raw	2	2	sp|Q09666|AHNK_HUMAN
HAGDVEGHLS	53.59	1020.46	10	1	511.239	9.68	102000	11	F11:2299	170303_WF1_2.raw	2	2	sp|P06727|APOA4_HUMAN
TKTYFPHFDLSHGSAQV	53.58	1933.93	17	-0.5	967.973	56.96	23400000	11	F11:34674	170303_WF1_2.raw	6	6	sp|P69905|HBA_HUMAN
DLPSLAADFV	53.57	1046.53	10	0.7	524.272	115.72	326000	7	F7:58363	WF4_80uL_long_1.raw	5	5	sp|P02768|ALBU_HUMAN
GSGNARPNNPDWGTF	53.56	1588.7	15	0	795.358	43.52	36000	11	F11:25487	170303_WF1_2.raw	2	2	sp|P02671|FIBA_HUMAN
IVAEGRDDLY	53.56	1149.57	10	2.8	575.792	25.14	85300	10	F10:11667	WF5_80uL_long_2.raw	2	2	sp|P01008|ANT3_HUMAN
NLEFLSLINVGLI	53.54	1443.83	13	1.1	722.925	117.92	56900	1	F1:61104	WF1_80uL_long_1.raw	2	2	sp|Q92688|AN32B_HUMAN
LPAEKEVGPPLP	53.53	1245.7	12	2.9	623.857	43.79	1170000	8	F8:19322	WF4_80uL_long_2.raw	4	4	sp|Q16610|ECM1_HUMAN
DLEHQGGHVL	53.52	1103.54	10	1.6	552.776	16.37	8400000	12	F12:6323	170303_WF1_3.raw	12	12	sp|P01042|KNG1_HUMAN
ESGSFRPDSPGSGNA	53.52	1463.63	15	0.9	732.822	14.06	1330000	3	F3:4169	WF2_80uL_long_1.raw	11	11	sp|P02671|FIBA_HUMAN
AVFVDLEPTVIDEVR	53.51	1700.9	15	4.1	851.46	103.58	607000	8	F8:47052	WF4_80uL_long_2.raw	8	8	sp|Q71U36|TBA1A_HUMAN:sp|P68363|TBA1B_HUMAN:sp|Q9BQE3|TBA1C_HUMAN
SILTIEDGIFEV	53.5	1334.7	12	-1.7	668.355	117	15500	3	F3:81936	WF2_80uL_long_1.raw	2	2	sp|P11142|HSP7C_HUMAN
AEALERM(+15.99)FL	53.49	1094.54	9	0.9	548.279	50.67	17800000	11	F11:30377	170303_WF1_2.raw	22	22	sp|P69905|HBA_HUMAN	Oxidation (M)	M7:Oxidation (M):1000.00
KVSFLSALEEYT	53.49	1385.71	12	2.6	693.863	105.81	25600	7	F7:51828	WF4_80uL_long_1.raw	2	2	sp|P02647|APOA1_HUMAN
HDNFGIVEGLM(+15.99)TTV	53.48	1547.73	14	3.1	774.874	90.87	819000	6	F6:38590	WF3_80uL_long_2.raw	7	7	sp|P04406|G3P_HUMAN	Oxidation (M)	M11:Oxidation (M):1000.00
DLYGNLGHPLS	53.48	1184.58	11	-1.2	593.298	65.37	90800	4	F4:33522	WF2_80uL_long_2.raw	1	1	sp|Q86X76|NIT1_HUMAN
WGKVGAHAGEYGAEALER	53.48	1899.92	18	0.4	634.315	26.97	224000	16	F16:10736	170303_WF3_2.raw	3	3	sp|P69905|HBA_HUMAN
ALVILAKGAEEM(+15.99)ET	53.48	1489.77	14	1.6	745.893	38.6	75100	15	F15:15011	170303_WF3_1.raw	3	3	sp|Q99497|PARK7_HUMAN	Oxidation (M)	M12:Oxidation (M):1000.00
LYNKYPDAV	53.47	1081.54	9	0.8	541.78	24.34	8670000	3	F3:12276	WF2_80uL_long_1.raw	8	8	sp|P10451|OSTP_HUMAN
AVLTIDEKGTE	53.46	1174.61	11	-0.3	588.311	24.02	2070000	5	F5:9201	WF3_80uL_long_1.raw	10	10	sp|P01009|A1AT_HUMAN
SLAPYAQDTQEKLNHQ	53.46	1841.89	16	2	921.955	22.44	227000	16	F16:8940	170303_WF3_2.raw	6	6	sp|P06727|APOA4_HUMAN
SGGGGGGGLGSGGSIRSSY	53.45	1568.72	19	0.4	785.366	19.64	11300	20	F20:8055	170303_WF5_2.raw	1	1	sp|P35527|K1C9_HUMAN
NDPFIDLNYM(+15.99)VYM(+15.99)F	53.44	1812.77	14	-0.8	907.394	116.51	67500	3	F3:81561	WF2_80uL_long_1.raw	2	2	sp|P04406|G3P_HUMAN	Oxidation (M)	M10:Oxidation (M):1000.00;M13:Oxidation (M):1000.00
TLSLPELEQQQ	53.44	1284.66	11	2.5	643.337	81.2	4410000	10	F10:42465	WF5_80uL_long_2.raw	6	6	sp|P06727|APOA4_HUMAN
SENTDFLAPGVSSF	53.43	1469.67	14	0.5	735.841	105.02	7050000	5	F5:45219	WF3_80uL_long_1.raw	8	8	sp|Q14515|SPRL1_HUMAN
ALNLPTLPEVKFPEVD	53.42	1780.96	16	-0.6	891.487	109.43	60500	3	F3:75498	WF2_80uL_long_1.raw	2	2	sp|P04114|APOB_HUMAN
FSN(+.98)GADLSGVTEEAPLKL	53.42	1847.92	18	-0.1	924.965	102.1	52600	9	F9:49209	WF5_80uL_long_1.raw	2	2	sp|P01009|A1AT_HUMAN	Deamidation (NQ)	N3:Deamidation (NQ):1000.00
DRVYIHPFHLV	53.42	1394.75	11	0.7	465.923	52.45	106000000	11	F11:31795	170303_WF1_2.raw	18	18	sp|P01019|ANGT_HUMAN
FEYPSNAVEEV	53.4	1282.57	11	2.9	642.295	75.81	72500	3	F3:49466	WF2_80uL_long_1.raw	2	2	sp|Q14624|ITIH4_HUMAN
SYFEKSKEQLTPL	53.38	1568.81	13	0.5	785.412	40.14	514000	11	F11:23217	170303_WF1_2.raw	6	6	sp|P02652|APOA2_HUMAN
SSKITHRIHWESA	53.33	1550.8	13	1.5	776.406	11.69	8580000	16	F16:2918	170303_WF3_2.raw	4	4	sp|P01024|CO3_HUMAN
KPEEEAPAPEVGASKPEG	53.33	1820.88	18	2.1	607.968	12.64	9970000	7	F7:3486	WF4_80uL_long_1.raw	14	14	sp|P04004|VTNC_HUMAN
VSFLSALEEY	53.31	1156.57	10	0.1	579.29	113.62	468000	17	F17:47851	170303_WF4_1.raw	9	9	sp|P02647|APOA1_HUMAN
TFVNITPAEVGVLVGKD	53.3	1757.96	17	1.5	879.987	105.19	173000	6	F6:45895	WF3_80uL_long_2.raw	3	3	sp|P07737|PROF1_HUMAN
AWFLESKDSLL	53.29	1307.68	11	3.5	654.848	104.15	666000	8	F8:47476	WF4_80uL_long_2.raw	4	4	sp|P55056|APOC4_HUMAN
NWASSINDAPVLI	53.29	1398.71	13	3.2	700.367	109.71	466000	3	F3:75728	WF2_80uL_long_1.raw	2	2	sp|P02748|CO9_HUMAN
ADQLRTQVNTQAEQLR	53.28	1869.97	16	0.1	624.329	21.09	22000000	11	F11:10479	170303_WF1_2.raw	9	9	sp|P06727|APOA4_HUMAN
SWAPFQDTSEYII	53.28	1555.72	13	-0.6	778.867	114.29	168000	3	F3:79705	WF2_80uL_long_1.raw	1	1	sp|P02751|FINC_HUMAN
GQPSVLQVVNLPI	53.27	1362.79	13	2.8	682.403	112.52	400000	4	F4:64589	WF2_80uL_long_2.raw	6	6	sp|P00734|THRB_HUMAN
GLPGPPDVPDHAA	53.25	1241.6	13	2.6	621.811	38.93	79200000	4	F4:19340	WF2_80uL_long_2.raw	13	13	sp|Q14624|ITIH4_HUMAN
SSQVTQELRAL	53.25	1230.66	11	-0.1	616.336	43.45	558000	19	F19:19882	170303_WF5_1.raw	6	6	sp|P02649|APOE_HUMAN
DKETPSGFTV	53.25	1079.51	10	2.9	540.766	32.07	444000	10	F10:15331	WF5_80uL_long_2.raw	2	2	sp|P06732|KCRM_HUMAN
VLPGGNLGAQNLSESA	53.24	1525.77	16	4	763.897	62.4	201000	9	F9:29551	WF5_80uL_long_1.raw	2	2	sp|Q99497|PARK7_HUMAN
NDEELNKLLGGV	53.23	1299.67	12	1.6	650.842	89.43	266000	5	F5:37672	WF3_80uL_long_1.raw	3	3
FDTASTGKTFPGFFSPM(+15.99)LGEF	53.22	2299.05	21	-1.9	1150.53	111.34	4370000	16	F16:44738	170303_WF3_2.raw	10	10	sp|P02671|FIBA_HUMAN	Oxidation (M)	M17:Oxidation (M):1000.00
N(+.98)VQFNYPHTSVT	53.22	1406.65	12	-4.2	704.328	52.83	1100000	4	F4:25979	WF2_80uL_long_2.raw	4	4	sp|P19823|ITIH2_HUMAN	Deamidation (NQ)	N1:Deamidation (NQ):28.86
M(+15.99)N(+.98)SFVNDIFERI	53.21	1500.69	12	3.2	751.356	111.5	742000	10	F10:62371	WF5_80uL_long_2.raw	7	7		Oxidation (M); Deamidation (NQ)	M1:Oxidation (M):1000.00;N2:Deamidation (NQ):83.43
RIQLVEEELD	53.2	1242.65	10	0.9	622.331	50.95	2030000	16	F16:19481	170303_WF3_2.raw	9	9	sp|P07951|TPM2_HUMAN:sp|P09493|TPM1_HUMAN
VHASLDKFLASVS	53.2	1372.73	13	0.3	687.375	64.11	623000	11	F11:39728	170303_WF1_2.raw	2	2	sp|P69905|HBA_HUMAN
LVGLFEDTNL	53.2	1119.58	10	1.3	560.799	108.25	82800	9	F9:54181	WF5_80uL_long_1.raw	2	2	sp|Q71DI3|H32_HUMAN:sp|P84243|H33_HUMAN
ESLVSQYFQTV	53.2	1299.63	11	1.8	650.826	108.37	118000	1	F1:53125	WF1_80uL_long_1.raw	3	3	sp|P02652|APOA2_HUMAN
DQVLSVLKGEE	53.2	1215.63	11	2.2	608.826	58.7	9920000	11	F11:36036	170303_WF1_2.raw	11	11	sp|P02655|APOC2_HUMAN
IIKSYDLDPGAGSLEI	53.19	1689.88	16	2.8	845.951	92.25	347000	2	F2:44550	WF1_80uL_long_2.raw	4	4	sp|Q13790|APOF_HUMAN
LPPAGSPPDSHVL	53.19	1285.67	13	3.3	643.843	34.45	4610000	3	F3:20040	WF2_80uL_long_1.raw	5	5	sp|P02765|FETUA_HUMAN
VLGAFSDGLA	53.19	948.492	10	1.3	475.254	87.05	6620000	1	F1:39823	WF1_80uL_long_1.raw	16	16	sp|P68871|HBB_HUMAN:sp|P02042|HBD_HUMAN
FLNWDAFPKL	53.17	1249.65	10	1	625.833	109.05	385000	6	F6:48604	WF3_80uL_long_2.raw	5	5	sp|P60985|KTDAP_HUMAN
LLVVYPWTQRFF	53.17	1567.86	12	2.8	784.937	111.92	368000	10	F10:62728	WF5_80uL_long_2.raw	4	4	sp|P68871|HBB_HUMAN:sp|P02042|HBD_HUMAN:sp|P69891|HBG1_HUMAN:sp|P69892|HBG2_HUMAN
SEPINIIDALEM(+15.99)R	53.16	1515.76	13	1.4	758.889	103.64	224000	3	F3:70265	WF2_80uL_long_1.raw	3	3	sp|P04114|APOB_HUMAN	Oxidation (M)	M12:Oxidation (M):1000.00
AIPGLAGAGNSVLLV	53.15	1350.79	15	3.4	676.403	109.48	77300	9	F9:55135	WF5_80uL_long_1.raw	2	2	sp|P26599|PTBP1_HUMAN
LDNWDSVTSTFS	53.15	1370.6	12	3.7	686.309	101.58	154000	9	F9:48820	WF5_80uL_long_1.raw	2	2	sp|P02647|APOA1_HUMAN
YPWTQRF	53.13	996.482	7	1.8	499.249	55.01	40200000	9	F9:26968	WF5_80uL_long_1.raw	8	8	sp|P68871|HBB_HUMAN:sp|P02042|HBD_HUMAN:sp|P69891|HBG1_HUMAN:sp|P69892|HBG2_HUMAN
NVQFNYPHT	53.11	1118.51	9	-1.1	560.264	33.49	3320000	4	F4:15886	WF2_80uL_long_2.raw	12	12	sp|P19823|ITIH2_HUMAN
VSVLPEGGETPLF	53.1	1343.7	13	0.7	672.856	108.1	15900	8	F8:50085	WF4_80uL_long_2.raw	1	1	sp|P06396|GELS_HUMAN
DDIDVRFQ	53.1	1006.47	8	3.6	504.245	42.1	2070000	10	F10:20193	WF5_80uL_long_2.raw	11	11	sp|P04114|APOB_HUMAN
VRLLLPGELAKHAV	53.1	1514.93	14	1.4	505.985	49.19	1710000	14	F14:22829	170303_WF2_2.raw	5	5
M(+15.99)NFRPGVLS	53.1	1035.52	9	2.2	518.767	25.86	17400000	7	F7:11562	WF4_80uL_long_1.raw	3	3	sp|Q14624|ITIH4_HUMAN	Oxidation (M)	M1:Oxidation (M):1000.00
M(+15.99)GVVSLGSPSGEVSHPRKT	53.09	1939.98	19	1.9	970.998	13.17	16200000	8	F8:3897	WF4_80uL_long_2.raw	3	3	sp|P02765|FETUA_HUMAN	Oxidation (M)	M1:Oxidation (M):1000.00
TPFVTHPGYDTGNGI	53.07	1574.74	15	0.5	788.376	49.51	446000	13	F13:27162	170303_WF2_1.raw	4	4	sp|P02751|FINC_HUMAN
LKQ(+.98)VHPDTGISSKAM(+15.99)GI	53.06	1797.93	17	0.6	600.317	16.26	9430000	13	F13:6845	170303_WF2_1.raw	7	7		Deamidation (NQ); Oxidation (M)	Q3:Deamidation (NQ):1000.00;M15:Oxidation (M):1000.00
GVQLQDVPRGQVV	53.05	1393.77	13	3.3	697.893	43.39	755000	9	F9:20619	WF5_80uL_long_1.raw	5	5
LPGPPDVPDHA	53.02	1113.55	11	1.2	557.781	35.64	4140000	4	F4:17286	WF2_80uL_long_2.raw	11	11	sp|Q14624|ITIH4_HUMAN
GILGYTEHQV	53.01	1115.56	10	0	558.788	40.33	5350000	13	F13:22110	170303_WF2_1.raw	10	10	sp|P04406|G3P_HUMAN
LERPGGN(+.98)EIT	52.99	1085.54	10	1.6	543.776	17.64	2240000	6	F6:6282	WF3_80uL_long_2.raw	6	6	sp|P02671|FIBA_HUMAN	Deamidation (NQ)	N7:Deamidation (NQ):1000.00
FLEAERAQSI	52.98	1162.6	10	1.8	582.307	32.8	783000	8	F8:14169	WF4_80uL_long_2.raw	4	4	sp|Q14515|SPRL1_HUMAN
SFRPDSPGSGN(+.98)ARPNNPDWGTF	52.97	2376.05	22	0.9	793.025	65.84	71700000	14	F14:30845	170303_WF2_2.raw	10	10	sp|P02671|FIBA_HUMAN	Deamidation (NQ)	N11:Deamidation (NQ):33.06
NFRPGVL	52.97	801.45	7	0.5	401.732	26.72	365000000	16	F16:10833	170303_WF3_2.raw	20	20	sp|Q14624|ITIH4_HUMAN
GLVEKVQAA	52.97	913.523	9	0.6	457.769	16.46	2770000	17	F17:6004	170303_WF4_1.raw	6	6	sp|P02649|APOE_HUMAN
DTHIPGSPF	52.96	969.456	9	0.6	485.735	59.79	15600000	10	F10:29507	WF5_80uL_long_2.raw	13	13	sp|P21333|FLNA_HUMAN
GDDGIFDDNFIEER	52.96	1640.7	14	0.4	821.355	95.67	192000	9	F9:45704	WF5_80uL_long_1.raw	4	4
ISGLIYEETR	52.94	1179.61	10	0.9	590.815	37.05	4870000	17	F17:15625	170303_WF4_1.raw	17	17	sp|P62805|H4_HUMAN
FGHGAEDSLADQAANEWG	52.93	1873.79	18	3.2	937.904	71.24	2740000	3	F3:46359	WF2_80uL_long_1.raw	9	9	sp|P0DJI8|SAA1_HUMAN
DDPIEKVIEGI	52.93	1226.64	11	2.7	614.329	110.32	836000	8	F8:51562	WF4_80uL_long_2.raw	4	4	sp|Q6UWP8|SBSN_HUMAN
TAFGFASADLI	52.92	1111.55	11	3.7	556.787	110.57	65200	3	F3:76497	WF2_80uL_long_1.raw	1	1	sp|P04114|APOB_HUMAN
IYEETRGVLKV	52.92	1305.73	11	0.6	653.872	26.34	1750000	9	F9:12506	WF5_80uL_long_1.raw	7	7	sp|P62805|H4_HUMAN
YNKYPDAV	52.92	968.46	8	0.2	485.238	15.61	2090000	4	F4:5112	WF2_80uL_long_2.raw	6	6	sp|P10451|OSTP_HUMAN
FVTHPGYDTGNGI	52.9	1376.64	13	1.8	689.327	34.61	3840000	3	F3:19967	WF2_80uL_long_1.raw	4	4	sp|P02751|FINC_HUMAN
FILGQEFDEV	52.9	1195.58	10	3.2	598.797	107.84	59200	10	F10:59404	WF5_80uL_long_2.raw	1	1	sp|P15090|FABP4_HUMAN
SGVAVSDGVIKVF	52.9	1276.7	13	1.6	639.36	78.99	286000	18	F18:30781	170303_WF4_2.raw	2	2	sp|P23528|COF1_HUMAN
DIPTNSPELEETLTHTI	52.9	1908.93	17	0.6	955.474	103.96	392000	12	F12:54871	170303_WF1_3.raw	4	4	sp|P01042|KNG1_HUMAN
TGQWHSESGSF	52.89	1221.51	11	1	611.76	20.36	9850000	10	F10:8976	WF5_80uL_long_2.raw	12	12	sp|P02671|FIBA_HUMAN
VLLDQLGTTI	52.88	1071.62	10	1.8	536.817	104.27	1320000	4	F4:58163	WF2_80uL_long_2.raw	2	2	sp|P04114|APOB_HUMAN
NFRPGVLSS	52.88	975.514	9	1.9	488.765	24.34	83600000	8	F8:10405	WF4_80uL_long_2.raw	19	19	sp|Q14624|ITIH4_HUMAN
THLAPYSDELRQ	52.87	1428.7	12	-4.5	715.354	19.76	13800000	19	F19:8437	170303_WF5_1.raw	22	22	sp|P02647|APOA1_HUMAN
SAAILEYLTAEVLEL	52.86	1633.88	15	3.6	817.951	117.93	36700	4	F4:68528	WF2_80uL_long_2.raw	2	2	sp|P0C0S5|H2AZ_HUMAN:sp|Q71UI9|H2AV_HUMAN
N(+.98)VHSGSTFF	52.85	995.435	9	0.6	498.725	44.85	777000000	20	F20:20347	170303_WF5_2.raw	19	19	sp|Q14624|ITIH4_HUMAN	Deamidation (NQ)	N1:Deamidation (NQ):1000.00
M(+15.99)NFRPGVLSS	52.83	1122.55	10	1.6	562.283	26.2	14000000	7	F7:11733	WF4_80uL_long_1.raw	12	12	sp|Q14624|ITIH4_HUMAN	Oxidation (M)	M1:Oxidation (M):1000.00
GWVTDGFSSLKDYWSTV	52.83	1946.9	17	0.5	974.46	114.31	1000000	3	F3:79731	WF2_80uL_long_1.raw	8	8	sp|P02656|APOC3_HUMAN
GHLDQQVEEF	52.82	1200.54	10	1	601.278	32.97	182000000	14	F14:15695	170303_WF2_2.raw	19	19	sp|P06727|APOA4_HUMAN
VLEYLTAEILELA	52.8	1475.81	13	1.2	738.914	117.79	1850000	3	F3:82713	WF2_80uL_long_1.raw	4	4	sp|Q6FI13|H2A2A_HUMAN:sp|O75367|H2AY_HUMAN
QLTYNPDESSKPNM(+15.99)I	52.79	1751.8	15	2.3	876.911	34.42	4990000	2	F2:12992	WF1_80uL_long_2.raw	12	12	sp|P02679|FIBG_HUMAN	Oxidation (M)	M14:Oxidation (M):1000.00
AAFNSGKVDIV	52.79	1119.59	11	0.5	560.804	42.96	2250000	2	F2:17046	WF1_80uL_long_2.raw	5	5	sp|P04406|G3P_HUMAN
TLAAHLPAEFTPA	52.78	1337.7	13	2.4	669.858	71.77	30900000	2	F2:32694	WF1_80uL_long_2.raw	10	10	sp|P69905|HBA_HUMAN
GSGN(+.98)ARPNNPDWGTF	52.78	1589.69	15	-3.3	795.847	58.23	102000	3	F3:36387	WF2_80uL_long_1.raw	3	3	sp|P02671|FIBA_HUMAN	Deamidation (NQ)	N4:Deamidation (NQ):42.89
FFTREPQD	52.77	1038.48	8	0.7	520.246	21.82	37100000	1	F1:5571	WF1_80uL_long_1.raw	6	6	sp|P10909|CLUS_HUMAN
VRAKLEEQAQQI	52.76	1411.78	12	2.1	706.898	13.92	214000	8	F8:4371	WF4_80uL_long_2.raw	4	4	sp|P02649|APOE_HUMAN
GLEEELQFSLGSKINV	52.72	1761.91	16	-0.8	881.964	107.33	1430000	6	F6:47412	WF3_80uL_long_2.raw	10	10
PGSSGTGGTATWKPG	52.72	1359.64	15	1.1	680.829	14.69	536000	6	F6:4534	WF3_80uL_long_2.raw	3	3	sp|P02671|FIBA_HUMAN
GFPRGDKLFGPDL	52.71	1417.74	13	1	473.586	67.6	166000000	16	F16:25913	170303_WF3_2.raw	16	16	sp|P08697|A2AP_HUMAN
LGPLVEQGR	52.71	967.545	9	1.7	484.781	18.37	989000	13	F13:8316	170303_WF2_1.raw	5	5	sp|P02649|APOE_HUMAN
DQNVEELKGRLTPY	52.7	1660.84	14	2.3	831.43	50.01	13000000	8	F8:22022	WF4_80uL_long_2.raw	6	6	sp|P06727|APOA4_HUMAN
SVSTVLTSKYR	52.7	1239.68	11	1.8	620.85	16.55	1250000	13	F13:7060	170303_WF2_1.raw	4	4	sp|P69905|HBA_HUMAN
GFDVDYDFL	52.7	1089.47	9	0.9	545.74	112.91	384000	10	F10:63510	WF5_80uL_long_2.raw	5	5	sp|P19823|ITIH2_HUMAN
PGVTVKDVNQQEFV	52.7	1558.8	14	3.9	780.41	48.59	26300	5	F5:20094	WF3_80uL_long_1.raw	1	1
GSEM(+15.99)VVAGKLQD	52.7	1248.6	12	0.1	625.308	16.37	139000	8	F8:5934	WF4_80uL_long_2.raw	3	3	sp|Q14624|ITIH4_HUMAN	Oxidation (M)	M4:Oxidation (M):1000.00
ELTQQLNALF	52.7	1175.62	10	3.8	588.819	108.17	13600000	7	F7:53514	WF4_80uL_long_1.raw	20	20	sp|P06727|APOA4_HUMAN
LTDFRAFQTV	52.68	1196.62	10	-2.5	599.315	67.29	243000	7	F7:32413	WF4_80uL_long_1.raw	2	2	sp|P49747|COMP_HUMAN
GSEM(+15.99)VVAGKLQDRGPDV	52.68	1772.87	17	0.7	591.965	22.45	133000000	16	F16:9050	170303_WF3_2.raw	12	12	sp|Q14624|ITIH4_HUMAN	Oxidation (M)	M4:Oxidation (M):1000.00
DLYANTVLSGGTTM(+15.99)YPGIADR	52.67	2230.06	21	2.6	744.362	95.34	369000	2	F2:46179	WF1_80uL_long_2.raw	4	4	sp|P60709|ACTB_HUMAN:sp|P63261|ACTG_HUMAN	Oxidation (M)	M14:Oxidation (M):1000.00
AIGALQEASEAYLV	52.66	1433.74	14	2.1	717.879	105.28	1010000	3	F3:71717	WF2_80uL_long_1.raw	4	4	sp|P84243|H33_HUMAN
SGSTGQWHSESGSFRPDSPGSGNA	52.63	2391.01	24	4.1	1196.52	20.88	751000000	10	F10:9294	WF5_80uL_long_2.raw	13	13	sp|P02671|FIBA_HUMAN
SGSTGQWHSESGSFR	52.63	1608.69	15	-0.5	805.353	13.44	667000	11	F11:4804	170303_WF1_2.raw	5	5	sp|P02671|FIBA_HUMAN
LSGIGTLDGFR	52.6	1134.6	11	1.6	568.31	64.37	4580	15	F15:24379	170303_WF3_1.raw	1	1	sp|P02671|FIBA_HUMAN
HVLLAAPPGHQLH	52.6	1388.77	13	0.1	463.93	13.66	27500000	15	F15:4266	170303_WF3_1.raw	12	12	sp|P02765|FETUA_HUMAN
YGINILGM(+15.99)DPL	52.59	1220.61	11	-0.1	611.313	109.55	242000	7	F7:54445	WF4_80uL_long_1.raw	2	2	sp|P02748|CO9_HUMAN	Oxidation (M)	M8:Oxidation (M):1000.00
NFAPIPGEPVVPI	52.59	1348.74	13	2.3	675.378	108.7	4340	5	F5:47892	WF3_80uL_long_1.raw	1	1	sp|Q02747|GUC2A_HUMAN
TFPGFFSPM(+15.99)LGEFVSETESR	52.58	2280.04	20	3.5	761.024	111.08	26700000	7	F7:55693	WF4_80uL_long_1.raw	20	20	sp|P02671|FIBA_HUMAN	Oxidation (M)	M9:Oxidation (M):1000.00
VTALWGKVNVDEV	52.58	1428.76	13	4.9	715.391	80.41	97600	10	F10:41705	WF5_80uL_long_2.raw	2	2	sp|P68871|HBB_HUMAN
DIVM(+15.99)TQTPLSSPV	52.57	1402.7	13	-1	702.357	80.5	2080000	4	F4:42907	WF2_80uL_long_2.raw	16	16	sp|A0A0C4DH68|KV224_HUMAN	Oxidation (M)	M4:Oxidation (M):1000.00
SLGLKGETHEQVHSI	52.56	1633.84	15	2.7	817.931	14.08	8620000	11	F11:5311	170303_WF1_2.raw	6	6	sp|P05546|HEP2_HUMAN
KIDQNVEELKG	52.56	1271.67	11	1.7	636.844	13.59	12100000	8	F8:4173	WF4_80uL_long_2.raw	14	14	sp|P06727|APOA4_HUMAN
TPLFKQFF	52.55	1026.55	8	0.9	514.285	92.43	428000	18	F18:35662	170303_WF4_2.raw	2	2	sp|P06396|GELS_HUMAN
TPIFKQFF	52.55	1026.55	8	0.9	514.285	92.43	428000	18	F18:35662	170303_WF4_2.raw	2	2
GSEM(+15.99)VVAGKLQ	52.54	1133.58	11	-1.1	567.794	14.74	29600	5	F5:4231	WF3_80uL_long_1.raw	1	1	sp|Q14624|ITIH4_HUMAN	Oxidation (M)	M4:Oxidation (M):1000.00
GAGAPVYM(+15.99)AAV	52.54	1021.49	11	2.5	511.754	36.59	1090000	3	F3:21267	WF2_80uL_long_1.raw	5	5	sp|Q6FI13|H2A2A_HUMAN	Oxidation (M)	M8:Oxidation (M):1000.00
RGSESGIFTN(+.98)TKESS	52.53	1599.74	15	1.1	800.877	13.71	2130000	15	F15:4299	170303_WF3_1.raw	3	3	sp|P02671|FIBA_HUMAN	Deamidation (NQ)	N10:Deamidation (NQ):1000.00
NLDVSLQLPSR	52.53	1240.68	11	0.5	621.346	72.79	997000	1	F1:31143	WF1_80uL_long_1.raw	12	12	sp|P01024|CO3_HUMAN
RLLLPGELAKHAVSEGTKAVTKY	52.53	2480.41	23	1.8	621.111	64.09	16000000	19	F19:30048	170303_WF5_1.raw	3	3
AGDVEGHLSFL	52.53	1143.56	11	0.8	572.786	70.01	3390000	13	F13:40056	170303_WF2_1.raw	11	11	sp|P06727|APOA4_HUMAN
SFRPDSPGSGNA	52.52	1190.53	12	2.5	596.275	13.11	866000	3	F3:3310	WF2_80uL_long_1.raw	4	4	sp|P02671|FIBA_HUMAN
LVEVNPKSEDAGGAEGETPHM(+15.99)	52.52	2181.98	21	-4.2	728.332	18.46	177000	8	F8:7308	WF4_80uL_long_2.raw	3	3	sp|Q92954|PRG4_HUMAN	Oxidation (M)	M21:Oxidation (M):1000.00
HGHEQQHGLGHGHKF	52.5	1704.8	15	0.1	427.207	7.8	2440000	14	F14:1815	170303_WF2_2.raw	7	7	sp|P01042|KNG1_HUMAN
TPDM(+15.99)DYLPR	52.5	1122.5	9	1	562.259	25.12	1480000	9	F9:11805	WF5_80uL_long_1.raw	9	9	sp|Q92954|PRG4_HUMAN	Oxidation (M)	M4:Oxidation (M):1000.00
STGKTFPGF	52.49	940.465	9	-0.5	471.24	36.24	3040000	4	F4:17444	WF2_80uL_long_2.raw	6	6	sp|P02671|FIBA_HUMAN
IENIDFNKSGSSTA	52.48	1481.7	14	3.1	741.859	25.36	1320000	13	F13:13077	170303_WF2_1.raw	5	5	sp|P04114|APOB_HUMAN
DTASTGKTFPGFFSPM(+15.99)LGEFVSETESR	52.48	2940.35	27	-1.2	981.122	107.9	15000000	16	F16:42488	170303_WF3_2.raw	7	7	sp|P02671|FIBA_HUMAN	Oxidation (M)	M16:Oxidation (M):1000.00
N(+.98)VGDIDIEGPEGKL	52.48	1455.71	14	0.8	728.862	81.39	381000	10	F10:42273	WF5_80uL_long_2.raw	6	6	sp|Q09666|AHNK_HUMAN	Deamidation (NQ)	N1:Deamidation (NQ):1000.00
PLPPPPAPETY	52.48	1177.6	11	3.1	589.81	56.58	350000	3	F3:35184	WF2_80uL_long_1.raw	2	2
SLAALKKALAAAGYDVEKN	52.47	1932.07	19	1.2	645.031	77.06	178000	14	F14:36331	170303_WF2_2.raw	5	5	sp|P16403|H12_HUMAN:sp|P10412|H14_HUMAN:sp|P16402|H13_HUMAN
ILATPPQEDAPSVDIA	52.47	1635.84	16	2	818.927	79.81	3390000	4	F4:42613	WF2_80uL_long_2.raw	6	6	sp|P29401|TKT_HUMAN
PGSTGTWNPGSSERG	52.46	1488.66	15	-0.6	745.337	15.62	66500	3	F3:5477	WF2_80uL_long_1.raw	1	1	sp|P02671|FIBA_HUMAN
PSLQAPVRVS	52.45	1052.6	10	0.7	527.307	23.72	6070000	16	F16:9553	170303_WF3_2.raw	10	10	sp|Q04206|TF65_HUMAN
SYQPPQNPYYYVDGD	52.45	1804.76	15	2.9	903.389	84.56	239000	3	F3:56254	WF2_80uL_long_1.raw	3	3	sp|Q06033|ITIH3_HUMAN
KIDQNVEELKGRLTPY	52.44	1902.02	16	1.2	635.015	45.7	9120000	18	F18:18862	170303_WF4_2.raw	5	5	sp|P06727|APOA4_HUMAN
AASQAALGL	52.44	800.439	9	1.3	401.227	39.66	76000000	4	F4:19514	WF2_80uL_long_2.raw	20	20	sp|P02768|ALBU_HUMAN
AQDTQEKLNHQLEGLTFQM(+15.99)	52.44	2246.06	19	1	1124.04	62.81	254000	15	F15:23871	170303_WF3_1.raw	3	3	sp|P06727|APOA4_HUMAN	Oxidation (M)	M19:Oxidation (M):1000.00
ILEGELERSEE	52.43	1302.63	11	-2.8	652.321	27.66	119000	10	F10:13006	WF5_80uL_long_2.raw	1	1	sp|P07951|TPM2_HUMAN
IVAEEFLKNF	52.42	1208.64	10	4.3	605.332	100.84	1140000	7	F7:48436	WF4_80uL_long_1.raw	7	7	sp|P59998|ARPC4_HUMAN
VHASLDKFLASVST	52.42	1473.78	14	1.1	737.899	66.18	2120000	12	F12:32525	170303_WF1_3.raw	6	6	sp|P69905|HBA_HUMAN
EGVQKEDIPPADLSDQVPDTESETRI	52.42	2867.37	26	2	956.798	69.23	9280000	8	F8:33000	WF4_80uL_long_2.raw	9	9	sp|P01024|CO3_HUMAN
AVGKVIPELN(+.98)GK	52.41	1224.71	12	1.9	613.362	22.1	48800000	11	F11:11355	170303_WF1_2.raw	20	20	sp|P04406|G3P_HUMAN	Deamidation (NQ)	N10:Deamidation (NQ):1000.00
VSDGVIKVF	52.4	962.544	9	0.4	482.279	53.26	233000	16	F16:20249	170303_WF3_2.raw	2	2	sp|P23528|COF1_HUMAN
DIQYPDATDEDIT	52.39	1494.64	13	-3	748.323	71.03	165000	3	F3:46166	WF2_80uL_long_1.raw	4	4	sp|P10451|OSTP_HUMAN
GIFTN(+.98)TKESS	52.39	1083.51	10	-0.8	542.761	21.08	7600000	15	F15:8305	170303_WF3_1.raw	10	10	sp|P02671|FIBA_HUMAN	Deamidation (NQ)	N5:Deamidation (NQ):1000.00
LVIIESDLERAEE	52.39	1514.78	13	1.5	758.4	69.02	86900	20	F20:31876	170303_WF5_2.raw	4	4	sp|P09493|TPM1_HUMAN
FRPDSPGSGNA	52.36	1103.5	11	2.6	552.759	12.54	278000	3	F3:2927	WF2_80uL_long_1.raw	3	3	sp|P02671|FIBA_HUMAN
HTFM(+15.99)GVVSLGSPSGEV	52.36	1618.77	16	0.5	810.391	62.75	2990000	6	F6:26710	WF3_80uL_long_2.raw	9	9	sp|P02765|FETUA_HUMAN	Oxidation (M)	M4:Oxidation (M):1000.00
TFPGFFSPM(+15.99)LGEFVSETES	52.34	2123.94	19	3.3	1062.98	116.85	39600000	7	F7:59129	WF4_80uL_long_1.raw	14	14	sp|P02671|FIBA_HUMAN	Oxidation (M)	M9:Oxidation (M):1000.00
RGDKLFGPDL	52.34	1116.59	10	1	559.304	34.45	18800000	15	F15:13473	170303_WF3_1.raw	17	17	sp|P08697|A2AP_HUMAN
SGIGTLDGF	52.33	865.418	9	0.5	433.717	84.2	2710000	8	F8:38116	WF4_80uL_long_2.raw	14	14	sp|P02671|FIBA_HUMAN
TQRLNGEIQAL	52.33	1241.67	11	0.8	621.844	32.91	18600000	10	F10:15704	WF5_80uL_long_2.raw	14	14	sp|P04114|APOB_HUMAN
TGKTFPGFFSPM(+15.99)LG	52.32	1501.73	14	1.7	751.872	91.91	805000	15	F15:34819	170303_WF3_1.raw	6	6	sp|P02671|FIBA_HUMAN	Oxidation (M)	M12:Oxidation (M):1000.00
IDDIDVRFQ	52.29	1119.56	9	2.2	560.787	53.96	2390000	9	F9:25428	WF5_80uL_long_1.raw	10	10	sp|P04114|APOB_HUMAN
TPNLAEFAFSLY	52.28	1371.67	12	1.3	686.844	117.5	497000	5	F5:52547	WF3_80uL_long_1.raw	4	4	sp|P01009|A1AT_HUMAN
TVIGPDGHKEVTKEV	52.28	1607.85	15	-0.7	804.933	12.39	81700	15	F15:3305	170303_WF3_1.raw	1	1	sp|P02671|FIBA_HUMAN
FEGSALGKQL	52.27	1048.56	10	2.2	525.286	30.99	3240000	19	F19:14431	170303_WF5_1.raw	4	4	sp|P02647|APOA1_HUMAN
GFGIYEVPEEL	52.26	1251.6	11	2.6	626.81	109.06	229000	9	F9:54809	WF5_80uL_long_1.raw	4	4
DWILEKTQAV	52.26	1201.63	10	1.1	601.825	71.47	36200000	7	F7:34418	WF4_80uL_long_1.raw	13	13	sp|P03951|FA11_HUMAN
RPPGFSPF	52.25	903.46	8	0.5	452.738	45.4	3520000000	11	F11:27706	170303_WF1_2.raw	20	20	sp|P01042|KNG1_HUMAN
EVSADQVATV	52.25	1017.5	10	0.5	509.756	31.46	62800000	4	F4:14871	WF2_80uL_long_2.raw	16	16	sp|P06727|APOA4_HUMAN
GVVSLGSPSGEVS	52.24	1173.59	13	0.6	587.802	45.02	71900	8	F8:19736	WF4_80uL_long_2.raw	2	2	sp|P02765|FETUA_HUMAN
VGKVIPELNGKLTGM(+15.99)AF	52.24	1788.98	17	3.3	597.336	77.1	12000000	1	F1:34470	WF1_80uL_long_1.raw	10	10	sp|P04406|G3P_HUMAN	Oxidation (M)	M15:Oxidation (M):1000.00
YELNPLDHR	52.24	1155.57	9	-0.2	386.196	26.99	21900000	13	F13:14213	170303_WF2_1.raw	16	16
SGM(+15.99)DAALDDLIDTL	52.23	1464.67	14	3.2	733.342	116.09	164000	10	F10:66010	WF5_80uL_long_2.raw	4	4	sp|P20810|ICAL_HUMAN	Oxidation (M)	M3:Oxidation (M):1000.00
PAVHASLDKF	52.23	1083.57	10	1.2	362.198	18.21	679000	10	F10:7612	WF5_80uL_long_2.raw	8	7	sp|P69905|HBA_HUMAN
TLTSEEEARL	52.22	1147.57	10	0.3	574.793	24.02	1010000	19	F19:10909	170303_WF5_1.raw	4	4	sp|P00338|LDHA_HUMAN
DLGYDLLM(+15.99)TM(+15.99)	52.22	1202.52	10	4	602.27	105.91	258000	3	F3:72273	WF2_80uL_long_1.raw	4	4	sp|Q13790|APOF_HUMAN	Oxidation (M)	M8:Oxidation (M):1000.00;M10:Oxidation (M):1000.00
GAHAGEYGAEAL	52.22	1144.51	12	2.1	573.266	19.01	6880000	10	F10:8156	WF5_80uL_long_2.raw	7	7	sp|P69905|HBA_HUMAN
GINILGM(+15.99)DPL	52.21	1057.55	10	2.1	529.782	104.7	310000	8	F8:47876	WF4_80uL_long_2.raw	4	4	sp|P02748|CO9_HUMAN	Oxidation (M)	M7:Oxidation (M):1000.00
SSLQSGVPSKFSGSGSGTDFTLTI	52.21	2359.15	24	0.1	1180.58	99.65	1700000	16	F16:37296	170303_WF3_2.raw	3	3
AFFDTASTGKTFPGFFSP	52.21	1923.9	18	1.9	962.961	110.94	5580000	1	F1:55338	WF1_80uL_long_1.raw	8	8	sp|P02671|FIBA_HUMAN
RAKLEEQAQQI	52.2	1312.71	11	-1.6	657.361	12.55	1250000	11	F11:4061	170303_WF1_2.raw	1	1	sp|P02649|APOE_HUMAN
WLNPDPSQKQ	52.2	1211.59	10	-0.3	606.804	22.96	1550000	4	F4:10063	WF2_80uL_long_2.raw	2	2	sp|P10451|OSTP_HUMAN
YTVLQNEDTKSG	52.19	1353.64	12	3.9	677.831	16.86	117000	2	F2:4249	WF1_80uL_long_2.raw	2	2	sp|P00450|CERU_HUMAN
VHLTPEEKSAVTAL	52.18	1493.81	14	3	747.914	33.57	64600000	10	F10:16180	WF5_80uL_long_2.raw	19	19	sp|P68871|HBB_HUMAN
RPPWVTDDSF	52.18	1218.57	10	0	610.291	65.01	38900	10	F10:32303	WF5_80uL_long_2.raw	1	1
ALFQDKLGEVNTY	52.17	1496.75	13	0.8	749.383	73.34	34600	3	F3:47817	WF2_80uL_long_1.raw	1	1	sp|P06727|APOA4_HUMAN
SLVIENEAGDE	52.17	1174.54	11	0.7	588.275	37.99	85500	9	F9:18133	WF5_80uL_long_1.raw	2	2	sp|P19823|ITIH2_HUMAN
FLDDASPGDKRLAA	52.17	1474.74	14	4.5	738.381	26.56	45500	12	F12:12358	170303_WF1_3.raw	1	1	sp|P04114|APOB_HUMAN
SETESRGSESGIFT	52.17	1485.66	14	0	743.836	20.96	21300000	15	F15:8373	170303_WF3_1.raw	16	16	sp|P02671|FIBA_HUMAN
NYKPEEEYPDLSKH	52.15	1747.81	14	2.6	874.912	17.11	42400000	11	F11:7557	170303_WF1_2.raw	14	14	sp|P06732|KCRM_HUMAN
NVQFNYPHTSVTDV	52.15	1619.76	14	1.6	810.888	60.17	429000	9	F9:28457	WF5_80uL_long_1.raw	6	6	sp|P19823|ITIH2_HUMAN
LQEM(+15.99)DKDDESLIKY	52.15	1741.81	14	1	581.611	32.26	1980000	16	F16:12759	170303_WF3_2.raw	4	4	sp|P52566|GDIR2_HUMAN	Oxidation (M)	M4:Oxidation (M):1000.00
RLLLPGELAKH	52.13	1245.76	11	1.4	416.26	21.84	2530000	7	F7:9631	WF4_80uL_long_1.raw	14	14
AGDVEGHLSFLE	52.12	1272.6	12	1.4	637.308	69.2	21700000	4	F4:36126	WF2_80uL_long_2.raw	16	16	sp|P06727|APOA4_HUMAN
LVIIESDLER	52.11	1185.66	10	1	593.838	53.89	7520000	14	F14:24877	170303_WF2_2.raw	6	6	sp|P09493|TPM1_HUMAN
EM(+15.99)SAFGYVFPKAV	52.1	1460.7	13	2.2	731.359	90.74	6610000	11	F11:58548	170303_WF1_2.raw	9	9	sp|P04114|APOB_HUMAN	Oxidation (M)	M2:Oxidation (M):1000.00
M(+15.99)ENAFELPTGAGLQLQI	52.1	1846.91	17	-3.6	924.461	114.4	202000	2	F2:60520	WF1_80uL_long_2.raw	2	2	sp|P04114|APOB_HUMAN	Oxidation (M)	M1:Oxidation (M):1000.00
SLEAQADKY	52.09	1023.49	9	0.9	512.751	19	3200000	1	F1:4569	WF1_80uL_long_1.raw	9	9	sp|P07951|TPM2_HUMAN
WIQKVIDQFGE	52.08	1361.7	11	1.4	681.857	80.29	32600	7	F7:38664	WF4_80uL_long_1.raw	1	1	sp|P00734|THRB_HUMAN
IAFSATRTI	52.07	978.55	9	2.5	490.283	33.79	1290000	11	F11:19169	170303_WF1_2.raw	5	5	sp|P02746|C1QB_HUMAN
QWAGLVEKVQA	52.07	1227.66	11	1.4	614.839	52.62	820000	6	F6:22167	WF3_80uL_long_2.raw	4	4	sp|P02649|APOE_HUMAN
FLYPEKDEPTYI	52.07	1513.73	12	1.5	757.875	73.99	2930000	12	F12:36684	170303_WF1_3.raw	8	8	sp|P04114|APOB_HUMAN
FWDNLEKETEGL	52.05	1479.69	12	0.7	740.852	93.34	1860000	10	F10:49103	WF5_80uL_long_2.raw	5	5	sp|P02647|APOA1_HUMAN
KTFPGFFSPM(+15.99)	52.04	1173.55	10	1.1	587.784	70.88	5510000	4	F4:37435	WF2_80uL_long_2.raw	8	8	sp|P02671|FIBA_HUMAN	Oxidation (M)	M10:Oxidation (M):1000.00
EFTPEVQASWQK	52.02	1448.69	12	1.7	725.355	49.33	59600	4	F4:24097	WF2_80uL_long_2.raw	2	2	sp|P69891|HBG1_HUMAN:sp|P69892|HBG2_HUMAN
FSDGLAHL	52	858.423	8	-0.5	430.219	39.95	5100000	11	F11:23228	170303_WF1_2.raw	10	10	sp|P68871|HBB_HUMAN:sp|P02042|HBD_HUMAN
LNLPTLPEVKFPEV	51.98	1594.9	14	3.7	798.459	109.77	1060000	4	F4:62629	WF2_80uL_long_2.raw	7	7	sp|P04114|APOB_HUMAN
VVGGHPGNSPWTV	51.98	1305.65	13	1.6	653.832	35.75	260000	10	F10:17132	WF5_80uL_long_2.raw	3	3
NVQFNYPHTSV	51.98	1304.62	11	0.4	653.315	42.3	2970000	12	F12:20116	170303_WF1_3.raw	9	9	sp|P19823|ITIH2_HUMAN
SLPELEQQQEQ	51.98	1327.63	11	2.4	664.822	38.82	1750000	4	F4:18620	WF2_80uL_long_2.raw	3	3	sp|P06727|APOA4_HUMAN
AINVAVHV	51.96	821.476	8	-0.3	411.745	29.58	169000	8	F8:12666	WF4_80uL_long_2.raw	2	2	sp|P02766|TTHY_HUMAN
FLEKDLRDKV	51.95	1261.7	10	0.4	631.859	19.32	31300000	12	F12:8360	170303_WF1_3.raw	11	11	sp|P06727|APOA4_HUMAN
SGLIYEETRGV	51.95	1222.62	11	1	612.318	38.79	5880000	12	F12:18440	170303_WF1_3.raw	14	14	sp|P62805|H4_HUMAN
TSTFSKLREQLGPVTQEF	51.95	2067.06	18	0.4	1034.54	85.1	0	11	F11:54434	170303_WF1_2.raw	0	0	sp|P02647|APOA1_HUMAN
YFPHFDLSHGS	51.94	1305.58	11	0.9	436.2	54.49	57000000	11	F11:33391	170303_WF1_2.raw	12	12	sp|P69905|HBA_HUMAN
SSSGVIAPGAKAGV	51.94	1199.65	14	2.5	600.834	20.92	2470000	1	F1:5249	WF1_80uL_long_1.raw	2	2	sp|P04114|APOB_HUMAN
LEAIPM(+15.99)SIPPEVKFNKPFVFL	51.94	2431.32	21	4.2	811.452	108.08	7020000	19	F19:56086	170303_WF5_1.raw	1	1	sp|P01009|A1AT_HUMAN	Oxidation (M)	M6:Oxidation (M):1000.00
SGVQQLIQYYQDQK	51.94	1696.84	14	-1	849.427	86.37	320000	3	F3:57290	WF2_80uL_long_1.raw	5	5	sp|Q13790|APOF_HUMAN
GENFNKALVQ(+.98)QM(+15.99)EQL	51.93	1764.84	15	2.3	883.427	57	93100	17	F17:23198	170303_WF4_1.raw	2	2	sp|P06727|APOA4_HUMAN	Deamidation (NQ); Oxidation (M)	Q10:Deamidation (NQ):40.00;M12:Oxidation (M):1000.00
NVGKGQPSVLQVV	51.92	1323.75	13	0.6	662.883	43.79	18900000	6	F6:18573	WF3_80uL_long_2.raw	19	19	sp|P00734|THRB_HUMAN
VFEIKM(+15.99)DASLGNLFA	51.92	1669.84	15	2.6	835.929	105.19	414000	7	F7:51445	WF4_80uL_long_1.raw	4	4	sp|Q92520|FAM3C_HUMAN	Oxidation (M)	M6:Oxidation (M):1000.00
VLTGNPRLDLQEI	51.92	1466.81	13	-0.7	734.411	75.93	51000	9	F9:36162	WF5_80uL_long_1.raw	1	1	sp|P36955|PEDF_HUMAN
TALWGKVNVDEVGGEALG	51.92	1813.92	18	3.1	907.971	91.78	1620000	6	F6:39019	WF3_80uL_long_2.raw	6	6	sp|P68871|HBB_HUMAN
IHRALYYDLI	51.91	1275.7	10	1.5	638.857	59.26	2080000	11	F11:36412	170303_WF1_2.raw	5	5	sp|P36955|PEDF_HUMAN
GGVLPNIQAV	51.91	966.55	10	2.1	484.283	80.98	12900000	13	F13:47125	170303_WF2_1.raw	20	20	sp|Q6FI13|H2A2A_HUMAN
FFSPM(+15.99)LGEFVSETES	51.89	1721.75	15	0.4	861.882	109.09	1010000	15	F15:43761	170303_WF3_1.raw	10	10	sp|P02671|FIBA_HUMAN	Oxidation (M)	M5:Oxidation (M):1000.00
DEVGGEALGRLLV	51.87	1326.71	13	1.5	664.365	99.88	20100000	5	F5:41931	WF3_80uL_long_1.raw	11	11	sp|P68871|HBB_HUMAN
FDTASTGKTFPGFFSPM(+15.99)LG	51.86	2022.94	19	1.8	1012.48	104.9	3680000	16	F16:40427	170303_WF3_2.raw	9	9	sp|P02671|FIBA_HUMAN	Oxidation (M)	M17:Oxidation (M):1000.00
M(+15.99)LGQSTEELRV	51.84	1277.63	11	1	639.822	32.74	1500000	3	F3:18527	WF2_80uL_long_1.raw	3	3	sp|P02649|APOE_HUMAN	Oxidation (M)	M1:Oxidation (M):1000.00
TPFLNIDKL	51.84	1059.6	9	3.2	530.807	83.76	933000	6	F6:35675	WF3_80uL_long_2.raw	8	8	sp|P60985|KTDAP_HUMAN
TYNPDESSKPN(+.98)M(+15.99)I	51.83	1511.64	13	3.1	756.832	18.83	56800	4	F4:7254	WF2_80uL_long_2.raw	2	2	sp|P02679|FIBG_HUMAN	Deamidation (NQ); Oxidation (M)	N11:Deamidation (NQ):82.32;M12:Oxidation (M):1000.00
NHGIGQAGKEAEKLG	51.81	1507.77	15	3.1	503.6	11.28	595000	15	F15:2647	170303_WF3_1.raw	2	2	sp|Q6UWP8|SBSN_HUMAN
KVDIDAPDVSIEGPDA	51.8	1639.79	16	4.1	820.908	64.56	25900	10	F10:32074	WF5_80uL_long_2.raw	1	1	sp|Q09666|AHNK_HUMAN
NHQ(+.98)LEGLTFQM(+15.99)	51.8	1333.6	11	0.7	667.806	53.52	2250000	17	F17:21909	170303_WF4_1.raw	5	5	sp|P06727|APOA4_HUMAN	Deamidation (NQ); Oxidation (M)	Q3:Deamidation (NQ):14.63;M11:Oxidation (M):1000.00
TGIFTDQVLSV	51.78	1178.62	11	2.9	590.318	107.11	2130000	3	F3:73369	WF2_80uL_long_1.raw	11	11	sp|P02655|APOC2_HUMAN
TQEFWDNLEKETEGL	51.78	1837.84	15	4.5	919.93	107.78	25900000	12	F12:57967	170303_WF1_3.raw	13	13	sp|P02647|APOA1_HUMAN
SM(+15.99)VPNVGLKFSI	51.78	1306.7	12	2.2	654.356	86.81	720000	9	F9:42100	WF5_80uL_long_1.raw	9	9	sp|P17213|BPI_HUMAN	Oxidation (M)	M2:Oxidation (M):1000.00
SLDKFLASV	51.78	978.539	9	0.2	490.277	79.22	174000000	13	F13:46253	170303_WF2_1.raw	17	17	sp|P69905|HBA_HUMAN
TDLRIPSVQI	51.76	1140.65	10	1	571.333	81.1	29500000	13	F13:47031	170303_WF2_1.raw	10	10	sp|P04114|APOB_HUMAN
GPAKSPYQLV	51.75	1058.58	10	2.1	530.296	30.2	11600000	9	F9:14513	WF5_80uL_long_1.raw	19	19	sp|Q15582|BGH3_HUMAN
EGVQKEDIPPADLSDQVPDTESETRILL	51.75	3093.54	28	2.5	1032.19	98.78	146000000	8	F8:46143	WF4_80uL_long_2.raw	2	2	sp|P01024|CO3_HUMAN
STVLTSKY	51.75	897.481	8	0.9	449.748	15.15	5170000	14	F14:5734	170303_WF2_2.raw	6	6	sp|P69905|HBA_HUMAN
EVDETYVPKEF	51.75	1354.63	11	-2.8	678.32	56.96	83900	9	F9:26916	WF5_80uL_long_1.raw	3	3	sp|P02768|ALBU_HUMAN
IDVDAPDIDIHGPDA	51.74	1561.73	15	2.6	781.872	75.68	831000	3	F3:49411	WF2_80uL_long_1.raw	6	6	sp|Q09666|AHNK_HUMAN
SLEDKTERELLESYIDGR	51.74	2152.06	18	0.5	718.362	83.92	12300000	16	F16:31699	170303_WF3_2.raw	5	5	sp|P00734|THRB_HUMAN
VIHDNFGIV	51.74	1012.53	9	1.2	507.275	48.19	50300000	11	F11:28718	170303_WF1_2.raw	10	10	sp|P04406|G3P_HUMAN
FIREVPLNTI	51.73	1200.69	10	2.2	601.352	63.31	9910000	4	F4:32429	WF2_80uL_long_2.raw	9	9	sp|P01008|ANT3_HUMAN
NEIEDLM(+15.99)VDV	51.72	1191.53	10	0.3	596.774	91.17	338000	6	F6:38703	WF3_80uL_long_2.raw	3	3	sp|P12883|MYH7_HUMAN	Oxidation (M)	M7:Oxidation (M):1000.00
VLDLPDLPED	51.71	1124.56	10	1.1	563.288	104.07	4960000	5	F5:44489	WF3_80uL_long_1.raw	12	12	sp|Q9Y4L1|HYOU1_HUMAN
WDLDPEVRPTSAVAA	51.71	1625.8	15	1.9	813.911	76.26	7600000	7	F7:36709	WF4_80uL_long_1.raw	12	12	sp|P02656|APOC3_HUMAN
ILKESPSGYL	51.71	1105.6	10	1.3	553.809	35.48	3110000	9	F9:16998	WF5_80uL_long_1.raw	11	11	sp|Q99972|MYOC_HUMAN
LKAKIDQNVEEL	51.69	1398.77	12	1.4	700.394	24.75	1870000	8	F8:10727	WF4_80uL_long_2.raw	4	4	sp|P06727|APOA4_HUMAN
N(+.98)VQFNYPHTSV	51.68	1305.6	11	1.7	653.808	54.4	3780000	14	F14:25208	170303_WF2_2.raw	11	11	sp|P19823|ITIH2_HUMAN	Deamidation (NQ)	N1:Deamidation (NQ):18.53
VNLGGSKSISIS	51.68	1160.64	12	2.1	581.329	28.51	98500	19	F19:13143	170303_WF5_1.raw	2	2	sp|P04264|K2C1_HUMAN
NIILEEGKEI	51.68	1156.63	10	0.1	579.324	48.5	1740000	19	F19:22128	170303_WF5_1.raw	6	6	sp|P23528|COF1_HUMAN
TQRFFESFGDLSTPDA	51.67	1816.83	16	3.7	909.424	96.23	90800	9	F9:46000	WF5_80uL_long_1.raw	2	2	sp|P68871|HBB_HUMAN
REQLGPVTQEFWDNLEK	51.67	2088.03	17	0.3	697.017	93.77	1070000	3	F3:62591	WF2_80uL_long_1.raw	3	3	sp|P02647|APOA1_HUMAN
YPWTQRFF	51.66	1143.55	8	2.4	572.784	93.5	1140000	9	F9:44981	WF5_80uL_long_1.raw	5	5	sp|P68871|HBB_HUMAN:sp|P02042|HBD_HUMAN:sp|P69891|HBG1_HUMAN:sp|P69892|HBG2_HUMAN
FGHGAEDSLADQAANEWGR	51.65	2029.89	19	1.9	677.638	56.83	16000000	16	F16:21655	170303_WF3_2.raw	9	9	sp|P0DJI8|SAA1_HUMAN
FDEFKPLVEEPQN	51.64	1590.76	13	4.1	796.389	68.86	126000	5	F5:28776	WF3_80uL_long_1.raw	3	3	sp|P02768|ALBU_HUMAN
ALTNAVAHVDDM(+15.99)PNA	51.63	1553.71	15	0.8	777.865	25.97	1940000	16	F16:10322	170303_WF3_2.raw	4	4	sp|P69905|HBA_HUMAN	Oxidation (M)	M12:Oxidation (M):1000.00
DEKVLDSGF	51.63	1008.48	9	2.6	505.247	43.73	587000	10	F10:20961	WF5_80uL_long_2.raw	5	5	sp|P01833|PIGR_HUMAN
TKTYFPHFDL	51.62	1267.62	10	0.7	634.819	68.97	14100000	11	F11:43210	170303_WF1_2.raw	8	8	sp|P69905|HBA_HUMAN
STITSREIQTAVRL	51.62	1573.88	14	1.4	525.634	45.77	4420000	8	F8:20196	WF4_80uL_long_2.raw	3	3
SLGLKGETHEQV	51.62	1296.67	12	0.5	649.341	13.22	393000	13	F13:4622	170303_WF2_1.raw	4	4	sp|P05546|HEP2_HUMAN
ALWGKVNVDEVGGEALG	51.6	1712.87	17	3	857.447	88.86	385000	5	F5:37447	WF3_80uL_long_1.raw	4	4	sp|P68871|HBB_HUMAN
DRLDEVKEQV	51.59	1229.63	10	1.9	615.821	21.46	11900000	7	F7:9291	WF4_80uL_long_1.raw	19	19	sp|P02649|APOE_HUMAN
EGKVLPGVDAL	51.59	1096.61	11	1.2	549.314	53.76	10600000	10	F10:25949	WF5_80uL_long_2.raw	19	19	sp|P00558|PGK1_HUMAN
GTELVNFLSYFVELGTQPATQ	51.57	2313.15	21	2.3	772.06	117.95	607000	1	F1:61132	WF1_80uL_long_1.raw	6	6	sp|P02652|APOA2_HUMAN
VVKLFDSDPITV	51.57	1331.73	12	3.8	666.877	91.51	670000	3	F3:60942	WF2_80uL_long_1.raw	3	3	sp|P10909|CLUS_HUMAN
AHVDDM(+15.99)PNALSALS	51.57	1455.67	14	2.2	728.842	49.4	1560000	1	F1:18877	WF1_80uL_long_1.raw	5	5	sp|P69905|HBA_HUMAN	Oxidation (M)	M6:Oxidation (M):1000.00
LQIDNARLAADDF	51.57	1460.73	13	-1.9	731.369	73.25	19300	5	F5:30548	WF3_80uL_long_1.raw	2	2
TLYGRPNWDNEF	51.57	1510.68	12	-3	756.347	70.36	50600	10	F10:35198	WF5_80uL_long_2.raw	2	2	sp|P04839|CY24B_HUMAN
SESGSFRPDSPGSGNARPN	51.53	1917.86	19	2.2	640.294	19.65	941000	1	F1:4862	WF1_80uL_long_1.raw	4	4	sp|P02671|FIBA_HUMAN
SLRPHADEL	51.52	1036.53	9	0.3	519.273	12.39	9160000	15	F15:3303	170303_WF3_1.raw	5	5	sp|P06727|APOA4_HUMAN
EDIPPADLSDQVPDTESET	51.52	2056.9	19	1	1029.46	77.39	189000	9	F9:38799	WF5_80uL_long_1.raw	5	5	sp|P01024|CO3_HUMAN
DGLAHLDNL	51.52	966.477	9	0	484.246	53.96	230000000	15	F15:20606	170303_WF3_1.raw	19	19	sp|P68871|HBB_HUMAN:sp|P02042|HBD_HUMAN
RLLLPGELAKHAVSEGTK	51.52	1918.1	18	0.4	480.532	31.96	18000000	11	F11:18279	170303_WF1_2.raw	13	13
FLSALEEYTKKLNTQ	51.5	1783.94	15	1.6	892.976	77.96	1000000	16	F16:29122	170303_WF3_2.raw	7	7	sp|P02647|APOA1_HUMAN
NDPFIDLNYM(+15.99)	51.5	1256.54	10	3	629.278	102.04	1040000	3	F3:68924	WF2_80uL_long_1.raw	6	6	sp|P04406|G3P_HUMAN	Oxidation (M)	M10:Oxidation (M):1000.00
NSPLDEENLT	51.5	1130.51	10	2.2	566.263	49.2	1200000	1	F1:18703	WF1_80uL_long_1.raw	7	7	sp|P01011|AACT_HUMAN
SLAELGGHLDQQVE	51.49	1494.73	14	1.8	748.374	54.62	9000000	5	F5:22643	WF3_80uL_long_1.raw	22	22	sp|P06727|APOA4_HUMAN
PGVLSSRQL	51.49	955.545	9	0.7	478.78	21.07	22300000	15	F15:8427	170303_WF3_1.raw	17	17	sp|Q14624|ITIH4_HUMAN
AQDTQEKLNHQLEGL	51.47	1722.85	15	1.5	862.435	32.55	7700000	16	F16:12791	170303_WF3_2.raw	7	7	sp|P06727|APOA4_HUMAN
SWYDNEFGYS	51.47	1266.48	10	4.9	634.252	100.69	789000	4	F4:55411	WF2_80uL_long_2.raw	2	2	sp|P04406|G3P_HUMAN
PLFM(+15.99)GKVVNPTQK	51.47	1473.8	13	2.9	737.91	20.38	6630000	20	F20:8453	170303_WF5_2.raw	4	4	sp|P01009|A1AT_HUMAN	Oxidation (M)	M4:Oxidation (M):1000.00
GDVVM(+15.99)TQSPLSLPV	51.47	1457.74	14	2.6	729.881	102.03	193000	3	F3:68913	WF2_80uL_long_1.raw	3	3	sp|A0A075B6S6|KVD30_HUMAN:sp|P06310|KV230_HUMAN	Oxidation (M)	M5:Oxidation (M):1000.00
QGSDSVFSGFLLFPD	51.44	1614.76	15	2.8	808.388	117.67	19700000	3	F3:82616	WF2_80uL_long_1.raw	14	14	sp|P02747|C1QC_HUMAN
AQDFKTDLRFQSSAV	51.43	1711.85	15	3.8	856.937	49.06	1490000	14	F14:22785	170303_WF2_2.raw	5	5	sp|Q71DI3|H32_HUMAN
TDLRIPSVQINF	51.42	1401.76	12	2.3	701.89	103.97	677000	14	F14:51289	170303_WF2_2.raw	5	5	sp|P04114|APOB_HUMAN
TDAGFTLRWV	51.41	1164.59	10	1.9	583.305	95.94	26700	10	F10:50516	WF5_80uL_long_2.raw	3	3	sp|P18206|VINC_HUMAN
SGGNTLHLV	51.41	896.472	9	0.8	449.243	22.02	3510000	14	F14:10058	170303_WF2_2.raw	9	9	sp|P04114|APOB_HUMAN
LTIDEKGTEAA	51.4	1146.58	11	2.2	574.297	20.15	3640000	1	F1:5008	WF1_80uL_long_1.raw	8	8	sp|P01009|A1AT_HUMAN
YKSELEEQLTPV	51.4	1434.72	12	1.7	718.37	51.77	20500000	9	F9:24455	WF5_80uL_long_1.raw	17	17	sp|P02649|APOE_HUMAN
PDSPGSGNARPNNPDWGTF	51.39	1984.87	19	0.8	993.441	55.72	6900000	3	F3:34807	WF2_80uL_long_1.raw	8	8	sp|P02671|FIBA_HUMAN
ELLESYIDGR	51.37	1193.59	10	2.5	597.805	65.31	865000	6	F6:27703	WF3_80uL_long_2.raw	2	2	sp|P00734|THRB_HUMAN
RLEALKENGGARLA	51.37	1496.84	14	2.4	499.956	12.95	11500000	8	F8:3704	WF4_80uL_long_2.raw	19	19	sp|P02647|APOA1_HUMAN
TSPVDEKALQDQLV	51.35	1541.79	14	-0.6	771.904	61.35	86300	10	F10:30201	WF5_80uL_long_2.raw	3	3	sp|P01019|ANGT_HUMAN
IITGPEIKYT	51.35	1133.63	10	1.3	567.825	37.63	1550000	15	F15:14619	170303_WF3_1.raw	11	11	sp|Q15063|POSTN_HUMAN
ELERPGGNEI	51.34	1112.55	10	2.7	557.282	19.57	808000000	10	F10:9227	WF5_80uL_long_2.raw	11	11	sp|P02671|FIBA_HUMAN
AQAWGERL	51.34	929.472	8	1	465.744	26.4	9020000	5	F5:10418	WF3_80uL_long_1.raw	14	14	sp|P02649|APOE_HUMAN
VGKVIPELN(+.98)GKLTGM(+15.99)AF	51.33	1789.96	17	2.6	597.664	72.84	60000000	10	F10:37099	WF5_80uL_long_2.raw	16	16	sp|P04406|G3P_HUMAN	Deamidation (NQ); Oxidation (M)	N9:Deamidation (NQ):1000.00;M15:Oxidation (M):1000.00
DIDVPDVEVQGPDWHL	51.31	1832.86	16	-4.3	917.432	108.7	35300	9	F9:54530	WF5_80uL_long_1.raw	2	2	sp|Q09666|AHNK_HUMAN
SIYVYKV	51.31	870.485	7	0.1	436.25	31.88	181000000	11	F11:18073	170303_WF1_2.raw	21	21
PNNPDWGTFEEVSGNVSPGT	51.3	2102.92	20	2.4	1052.47	102.09	145000	16	F16:38659	170303_WF3_2.raw	2	2	sp|P02671|FIBA_HUMAN
AFFDTASTGKTFPGFFSPM(+15.99)L	51.28	2184.02	20	-0.6	1093.02	112.15	3920000	4	F4:64316	WF2_80uL_long_2.raw	8	8	sp|P02671|FIBA_HUMAN	Oxidation (M)	M19:Oxidation (M):1000.00
SESGIFTNT	51.27	954.429	9	1	478.223	36.01	9300000	15	F15:14072	170303_WF3_1.raw	11	11	sp|P02671|FIBA_HUMAN
ENVIRDAVTY	51.26	1178.59	10	-0.3	590.304	39.79	121000	10	F10:19133	WF5_80uL_long_2.raw	3	3	sp|P62805|H4_HUMAN
SPLFM(+15.99)GKVVNPTQK	51.25	1560.83	14	0.6	521.285	22.42	64300000	15	F15:9073	170303_WF3_1.raw	19	19	sp|P01009|A1AT_HUMAN	Oxidation (M)	M5:Oxidation (M):1000.00
RQLGLPGPPDVPDHAA	51.22	1638.85	16	2.2	547.291	40.83	1230000	7	F7:18999	WF4_80uL_long_1.raw	4	4	sp|Q14624|ITIH4_HUMAN
DVDVPDVNIEGPDAKL	51.2	1694.84	16	2.5	848.428	89.48	744000	9	F9:43109	WF5_80uL_long_1.raw	10	10	sp|Q09666|AHNK_HUMAN
DVLKDSGRDYV	51.18	1265.63	11	-3	633.818	24.7	1430000	13	F13:12623	170303_WF2_1.raw	9	9	sp|P02647|APOA1_HUMAN
LLVVDPETDEQLQ	51.18	1497.76	13	1.7	749.887	85.43	7300	3	F3:56597	WF2_80uL_long_1.raw	1	1	sp|O14745|NHRF1_HUMAN
VLEYLTAEI	51.18	1049.56	9	1.3	525.79	105.07	2870000	9	F9:51585	WF5_80uL_long_1.raw	10	10	sp|Q6FI13|H2A2A_HUMAN:sp|O75367|H2AY_HUMAN
LN(+.98)HQLEGLTFQM(+15.99)	51.17	1446.68	12	-1.3	724.347	65.39	135000	6	F6:27745	WF3_80uL_long_2.raw	4	4	sp|P06727|APOA4_HUMAN	Deamidation (NQ); Oxidation (M)	N2:Deamidation (NQ):14.63;M12:Oxidation (M):1000.00
EEPAVPAPLPK	51.17	1146.63	11	1.3	574.322	29.9	16400000	10	F10:14367	WF5_80uL_long_2.raw	12	12	sp|P14317|HCLS1_HUMAN
FSDYIHPV	51.17	976.465	8	2.9	489.241	40.23	200000	10	F10:19345	WF5_80uL_long_2.raw	8	8	sp|P00734|THRB_HUMAN
TLTDFRAYQTV	51.16	1313.66	11	1.3	657.839	61.86	6200000	11	F11:38359	170303_WF1_2.raw	14	14
KVGAHAGEYGAEALE	51.16	1500.72	15	-0.1	751.368	16	269000	15	F15:5619	170303_WF3_1.raw	3	3	sp|P69905|HBA_HUMAN
IAQGGVLPNIQAV	51.16	1278.73	13	1.6	640.373	90	3840000	3	F3:60041	WF2_80uL_long_1.raw	10	10	sp|Q6FI13|H2A2A_HUMAN
LGAFSDGLAHL	51.15	1099.57	11	0.1	550.79	79.68	212000	3	F3:52328	WF2_80uL_long_1.raw	3	3	sp|P68871|HBB_HUMAN:sp|P02042|HBD_HUMAN
VGEVLNSIFF	51.14	1123.59	10	3	562.805	115.03	1680000	20	F20:61128	170303_WF5_2.raw	8	8	sp|P01019|ANGT_HUMAN
IDDIDVRF	51.12	991.497	8	1.2	496.757	64	161000	19	F19:29473	170303_WF5_1.raw	1	1	sp|P04114|APOB_HUMAN
VNLPIVERPV	51.11	1134.68	10	1.9	568.346	59.19	36400	4	F4:29735	WF2_80uL_long_2.raw	2	2	sp|P00734|THRB_HUMAN
RENADSLQASLRPHADE	51.11	1907.91	17	4.7	636.98	16.24	629000	7	F7:6003	WF4_80uL_long_1.raw	2	2	sp|P06727|APOA4_HUMAN
FDGFDFGDDPSDKF	51.11	1607.64	14	4.3	804.832	104.44	13200	10	F10:56584	WF5_80uL_long_2.raw	1	1	sp|P02679|FIBG_HUMAN
TGLSPGVTYYFKVFAV	51.1	1747.92	16	2.8	874.969	111.27	671000	3	F3:77124	WF2_80uL_long_1.raw	3	3	sp|P02751|FINC_HUMAN
HASLDKFLASVSTVLTS	51.09	1774.95	17	0.1	888.481	107.75	3540000	12	F12:57932	170303_WF1_3.raw	5	5	sp|P69905|HBA_HUMAN
SGLIYEETRGVLK	51.08	1463.8	13	1.9	732.908	42.61	4050000	13	F13:23382	170303_WF2_1.raw	9	9	sp|P62805|H4_HUMAN
TEEAPLKLS	51.07	986.528	9	1	494.272	22.33	9470000	9	F9:10249	WF5_80uL_long_1.raw	9	9	sp|P01009|A1AT_HUMAN
TWKPGSSGPGSTGSWN	51.07	1604.72	16	3	803.371	34.47	7390000	12	F12:16392	170303_WF1_3.raw	8	8	sp|P02671|FIBA_HUMAN
N(+.98)VHSGSTFFKYYLQGA	51.07	1818.86	16	0.9	910.437	87.71	2740000	16	F16:33020	170303_WF3_2.raw	3	3	sp|Q14624|ITIH4_HUMAN	Deamidation (NQ)	N1:Deamidation (NQ):113.79
SGSFRPDSPGSGN(+.98)ARPNNPDWGTF	51.06	2520.11	24	1.5	841.044	65	86200000	13	F13:37090	170303_WF2_1.raw	7	7	sp|P02671|FIBA_HUMAN	Deamidation (NQ)	N13:Deamidation (NQ):48.97
NFLSYFVELG	51.05	1187.59	10	4	594.803	117.62	14200	18	F18:49244	170303_WF4_2.raw	1	1	sp|P02652|APOA2_HUMAN
EETKENEGFTV	51.05	1281.57	11	2.2	641.795	22.83	7180000	5	F5:8682	WF3_80uL_long_1.raw	10	10	sp|P01024|CO3_HUMAN
SGNARPNNPDWGTF	51.04	1531.68	14	-1.4	766.846	50.18	1870000	1	F1:19153	WF1_80uL_long_1.raw	7	7	sp|P02671|FIBA_HUMAN
INYIQDEINTIF	51.03	1481.74	12	2.5	741.879	115.93	265000	4	F4:66984	WF2_80uL_long_2.raw	4	4	sp|P04114|APOB_HUMAN
LGAFSDGLAH	51.03	986.482	10	0	494.248	36.02	140000	20	F20:16362	170303_WF5_2.raw	2	2	sp|P68871|HBB_HUMAN:sp|P02042|HBD_HUMAN
TTLTAFGFASADLI	51.02	1426.73	14	-2.2	714.373	116.49	15900	3	F3:81516	WF2_80uL_long_1.raw	2	2	sp|P04114|APOB_HUMAN
EFVSETESRGSESG	51.01	1499.64	14	3.2	750.828	14.15	409000	5	F5:3941	WF3_80uL_long_1.raw	3	3	sp|P02671|FIBA_HUMAN
RQAVDTAVDGVFI	51	1389.73	13	4.6	695.873	70.75	1120000	9	F9:33562	WF5_80uL_long_1.raw	5	5	sp|P19827|ITIH1_HUMAN
IDKPSEDSPPLEM(+15.99)L	51	1585.75	14	3.3	793.887	54.08	2000000	3	F3:33360	WF2_80uL_long_1.raw	8	8	sp|P19827|ITIH1_HUMAN	Oxidation (M)	M13:Oxidation (M):1000.00
ILGTM(+15.99)PAFEV	50.98	1092.55	10	2.1	547.285	89.75	20600000	3	F3:60040	WF2_80uL_long_1.raw	14	14	sp|P04114|APOB_HUMAN	Oxidation (M)	M5:Oxidation (M):1000.00
HLPAEFTPAV	50.96	1080.56	10	2.7	541.289	51.19	150000000	9	F9:24287	WF5_80uL_long_1.raw	17	17	sp|P69905|HBA_HUMAN
AFGYVFPK	50.96	927.485	8	0.3	464.75	54.01	3520000	13	F13:29906	170303_WF2_1.raw	7	7	sp|P04114|APOB_HUMAN
IWHHTFY	50.95	1002.47	7	0	502.243	22.18	3590000	10	F10:10014	WF5_80uL_long_2.raw	5	5	sp|P60709|ACTB_HUMAN:sp|P63261|ACTG_HUMAN:sp|P68032|ACTC_HUMAN:sp|P68133|ACTS_HUMAN
PEVDVLTKY	50.91	1062.56	9	1.6	532.288	45.13	148000	13	F13:24730	170303_WF2_1.raw	3	3	sp|P04114|APOB_HUMAN
DTASTGKTFPGFFSPM(+15.99)LGE	50.91	2004.91	19	1.4	1003.47	104.68	30800000	8	F8:47859	WF4_80uL_long_2.raw	16	16	sp|P02671|FIBA_HUMAN	Oxidation (M)	M16:Oxidation (M):1000.00
ALQKLEEAEKAADESERGM(+15.99)	50.9	2120.01	19	2.1	707.677	25.39	952000	8	F8:10891	WF4_80uL_long_2.raw	7	7	sp|P07951|TPM2_HUMAN:sp|P09493|TPM1_HUMAN	Oxidation (M)	M19:Oxidation (M):1000.00
LLSFM(+15.99)QGYM(+15.99)	50.9	1120.49	9	1.6	561.255	70.64	5110000	4	F4:37169	WF2_80uL_long_2.raw	8	8	sp|P02656|APOC3_HUMAN	Oxidation (M)	M5:Oxidation (M):1000.00;M9:Oxidation (M):1000.00
SEETKENEGFTVTAEGK	50.89	1854.85	17	2.5	619.292	14.87	6770000	5	F5:4295	WF3_80uL_long_1.raw	13	13	sp|P01024|CO3_HUMAN
LLTIPEAEKSPL	50.87	1309.75	12	1.8	655.883	78.17	5110000	1	F1:34384	WF1_80uL_long_1.raw	8	8	sp|Q86VP6|CAND1_HUMAN
FPHFDLSHGSA	50.87	1213.55	11	-0.2	405.524	43.98	46000000	11	F11:26140	170303_WF1_2.raw	12	12	sp|P69905|HBA_HUMAN
KLLLQM(+15.99)DSSAT	50.87	1221.63	11	0.5	611.821	20.46	1810000	13	F13:9777	170303_WF2_1.raw	4	4	sp|P04114|APOB_HUMAN	Oxidation (M)	M6:Oxidation (M):1000.00
ALWGKVNVD	50.86	1000.53	9	1.1	501.275	45.17	177000	5	F5:18477	WF3_80uL_long_1.raw	4	4	sp|P68871|HBB_HUMAN:sp|P02042|HBD_HUMAN
VPPLIPPKIPEGERV	50.85	1639.97	15	1.1	547.663	58.39	293000000	20	F20:27731	170303_WF5_2.raw	11	11	sp|P13805|TNNT1_HUMAN
SEDPIEDPLQPDVT	50.85	1553.71	14	0.8	777.863	87.56	2710000	4	F4:47351	WF2_80uL_long_2.raw	6	6	sp|P12259|FA5_HUMAN
TGASGSFKL	50.84	866.45	9	2.1	434.233	21.21	293000	18	F18:8583	170303_WF4_2.raw	3	3	sp|P16401|H15_HUMAN:sp|P16403|H12_HUMAN:sp|P10412|H14_HUMAN:sp|P16402|H13_HUMAN
SSFLPWIRTT	50.83	1206.64	10	1.7	604.328	99.32	12400000	4	F4:54556	WF2_80uL_long_2.raw	15	15	sp|P08311|CATG_HUMAN
NEKLSQLQTYM(+15.99)I	50.83	1482.74	12	1.6	742.378	56.93	159000	11	F11:34614	170303_WF1_2.raw	4	4	sp|P04114|APOB_HUMAN	Oxidation (M)	M11:Oxidation (M):1000.00
SSRAGLQFPV	50.81	1060.57	10	1.1	531.291	45.94	53700000	17	F17:19207	170303_WF4_1.raw	18	18	sp|Q6FI13|H2A2A_HUMAN
KSYDLDPGAGSLEI	50.81	1463.71	14	1.9	732.866	74.48	283000	13	F13:42659	170303_WF2_1.raw	5	5	sp|Q13790|APOF_HUMAN
YVNKEIQNAV	50.8	1176.61	10	1.6	589.315	19.41	1140000	5	F5:6814	WF3_80uL_long_1.raw	9	9	sp|P10909|CLUS_HUMAN
VLEYLTAEILELAGNAA	50.79	1788.95	17	0.1	895.483	117.81	159000	9	F9:61767	WF5_80uL_long_1.raw	2	2	sp|Q6FI13|H2A2A_HUMAN:sp|O75367|H2AY_HUMAN
DLKVEDIPLA	50.79	1111.61	10	0.7	556.814	81.38	80700000	13	F13:47590	170303_WF2_1.raw	19	19	sp|P04114|APOB_HUMAN
SIQDWVQKTIAEN	50.77	1530.77	13	2.9	766.393	101	16400000	16	F16:38002	170303_WF3_2.raw	20	20	sp|P00738|HPT_HUMAN
DLKDYEDQQ	50.76	1152.49	9	3.5	577.256	20.03	120000	3	F3:8926	WF2_80uL_long_1.raw	1	1	sp|P02671|FIBA_HUMAN
GIAEFPSRG	50.75	932.472	9	1.7	467.244	22.35	155000000	5	F5:8915	WF3_80uL_long_1.raw	21	20	sp|P02671|FIBA_HUMAN
ILPGVLGSETL	50.74	1097.63	11	3	549.826	103.36	1980000	3	F3:70010	WF2_80uL_long_1.raw	8	8	sp|Q9BZQ8|NIBAN_HUMAN
AALDLNAVANK	50.73	1098.6	11	-0.5	550.309	30.59	118000	11	F11:17081	170303_WF1_2.raw	2	2	sp|P04114|APOB_HUMAN
KKLVAASQAALGL	50.73	1268.78	13	1.7	635.399	26.25	1320000	19	F19:12134	170303_WF5_1.raw	4	4	sp|P02768|ALBU_HUMAN
GEGGEFSVDRPI	50.72	1261.59	12	4.1	631.807	43.42	241000	4	F4:20991	WF2_80uL_long_2.raw	3	3	sp|Q8NC51|PAIRB_HUMAN
KDTEEEDFHVDQV	50.72	1589.68	13	1.4	795.851	27.81	329000	13	F13:14622	170303_WF2_1.raw	4	4	sp|P01009|A1AT_HUMAN
TWIEGVM(+15.99)RNN	50.72	1234.58	10	0.1	618.295	27.38	1300000	3	F3:14558	WF2_80uL_long_1.raw	5	5	sp|P00747|PLMN_HUMAN	Oxidation (M)	M7:Oxidation (M):1000.00
LDEVKEQVAEV	50.72	1257.65	11	3.9	629.832	28.6	134000	5	F5:11300	WF3_80uL_long_1.raw	2	2	sp|P02649|APOE_HUMAN
TQNNFRLLF	50.7	1151.61	9	1.5	576.812	83.7	3060000	17	F17:33271	170303_WF4_1.raw	9	9	sp|Q14624|ITIH4_HUMAN
VNEPSILEM(+15.99)S	50.7	1133.53	10	2.2	567.772	51.54	12400000	5	F5:21485	WF3_80uL_long_1.raw	15	15	sp|O14791|APOL1_HUMAN	Oxidation (M)	M9:Oxidation (M):1000.00
NALAHKYH	50.69	952.488	8	1.1	477.252	13.58	6190000	14	F14:4703	170303_WF2_2.raw	6	6	sp|P68871|HBB_HUMAN:sp|P02042|HBD_HUMAN
RVEPYGENF	50.69	1109.51	9	-0.9	555.764	26.72	600000	16	F16:10661	170303_WF3_2.raw	4	4	sp|P06727|APOA4_HUMAN
AATVGSLAGQPLQER	50.68	1496.79	15	3.4	749.407	32.47	5920	7	F7:14625	WF4_80uL_long_1.raw	1	1	sp|P02649|APOE_HUMAN
SLAALKKALAAAGYDVEKNNS	50.68	2133.14	21	1.1	712.056	77.41	4690000	11	F11:48762	170303_WF1_2.raw	5	5	sp|P16403|H12_HUMAN:sp|P10412|H14_HUMAN:sp|P16402|H13_HUMAN
LDKENAIDRAEQA	50.68	1471.73	13	4.5	736.874	14.9	125000	10	F10:5342	WF5_80uL_long_2.raw	4	4	sp|P07951|TPM2_HUMAN
LDKENALDRAEQA	50.68	1471.73	13	4.5	736.874	14.9	125000	10	F10:5342	WF5_80uL_long_2.raw	4	4	sp|P09493|TPM1_HUMAN
WLNPDPSQKQNL	50.67	1438.72	12	0.6	720.368	41.97	12600000	12	F12:20087	170303_WF1_3.raw	9	9	sp|P10451|OSTP_HUMAN
TLSGIGTLD	50.67	875.46	9	1.2	438.738	54.68	3360000	6	F6:23299	WF3_80uL_long_2.raw	6	6	sp|P02671|FIBA_HUMAN
SLLAYDLGLTT	50.65	1165.62	11	4.1	583.821	109.37	119000	3	F3:75447	WF2_80uL_long_1.raw	2	2	sp|P41218|MNDA_HUMAN
GKTFPGFFSP	50.65	1083.54	10	2.3	542.778	85.31	904000	1	F1:38681	WF1_80uL_long_1.raw	2	2	sp|P02671|FIBA_HUMAN
TFPGFFSPM(+15.99)L	50.64	1158.54	10	1.7	580.279	113.86	73300000	1	F1:58136	WF1_80uL_long_1.raw	15	15	sp|P02671|FIBA_HUMAN	Oxidation (M)	M9:Oxidation (M):1000.00
VVAGVANALAH	50.63	1020.57	11	2.5	511.294	25.64	96100	5	F5:9939	WF3_80uL_long_1.raw	3	3	sp|P68871|HBB_HUMAN:sp|P02042|HBD_HUMAN
ARISASAEEL	50.63	1045.54	10	1.8	523.778	19.25	1520000	8	F8:7723	WF4_80uL_long_2.raw	4	4	sp|P06727|APOA4_HUMAN
IGTLDGFR	50.63	877.466	8	0.9	439.74	32.9	47700000	15	F15:12994	170303_WF3_1.raw	26	26	sp|P02671|FIBA_HUMAN
LGQLGITKVFSN(+.98)GADLSGVTEEAPLKLS	50.62	2844.51	28	1.5	949.179	106.68	1580000	12	F12:57063	170303_WF1_3.raw	4	4	sp|P01009|A1AT_HUMAN	Deamidation (NQ)	N12:Deamidation (NQ):63.62
VYELNPLDH	50.62	1098.53	9	1.4	550.275	52.43	1360000	3	F3:32168	WF2_80uL_long_1.raw	4	4
ADALTNAVAHV	50.62	1080.56	11	1.9	541.287	46.79	204000	6	F6:19801	WF3_80uL_long_2.raw	5	5	sp|P69905|HBA_HUMAN
DSTFESKSY	50.61	1062.45	9	3.9	532.235	19.4	95800	3	F3:8478	WF2_80uL_long_1.raw	2	2	sp|P02671|FIBA_HUMAN
LLSFM(+15.99)QGY	50.6	973.458	8	1.9	487.737	75.67	1950000	4	F4:40117	WF2_80uL_long_2.raw	6	6	sp|P02656|APOC3_HUMAN	Oxidation (M)	M5:Oxidation (M):1000.00
YGKDLM(+15.99)EKV	50.6	1097.54	9	0.4	549.779	22.09	11100000	20	F20:9673	170303_WF5_2.raw	7	7	sp|P02652|APOA2_HUMAN	Oxidation (M)	M6:Oxidation (M):1000.00
VIDFEM(+15.99)QPI	50.59	1106.53	9	1.1	554.274	80.85	33100000	4	F4:43330	WF2_80uL_long_2.raw	18	18	sp|P07357|CO8A_HUMAN	Oxidation (M)	M6:Oxidation (M):1000.00
VLIFQEENEIPASVFV	50.59	1832.96	16	3.6	917.489	116.3	241000	10	F10:66165	WF5_80uL_long_2.raw	1	1	sp|O95810|CAVN2_HUMAN
TVIGPDGHKEVTKEVV	50.58	1706.92	16	1.5	854.469	14.32	59800000	15	F15:4804	170303_WF3_1.raw	9	9	sp|P02671|FIBA_HUMAN
SDLTEQLGSSGKTI	50.58	1434.72	14	2.5	718.369	43.02	55500	10	F10:20580	WF5_80uL_long_2.raw	2	2	sp|P12883|MYH7_HUMAN
SVYVYKVLKQVHPDTGISSKAM(+15.99)GI	50.58	2635.4	24	0.4	879.476	55.3	112000000	11	F11:33632	170303_WF1_2.raw	6	6		Oxidation (M)	M22:Oxidation (M):1000.00
RPDIQYPDATDEDI	50.57	1646.74	14	-2.6	824.376	53.52	4000	11	F11:32193	170303_WF1_2.raw	1	1	sp|P10451|OSTP_HUMAN
DDLQKRLAVYQAGAREGAE	50.57	2089.06	19	0.9	697.36	41.03	90400000	14	F14:19382	170303_WF2_2.raw	16	16	sp|P02649|APOE_HUMAN
[truncated: 5,810 more rows]
